# Supplementary material for: A Phase I study evaluating the safety and immunogenicity of MVA85A, a candidate TB vaccine, in HIV-infected adults
Source: PubMed Central journal article supplement — BMJ Open. 2011 Nov 14;1(2):e000223. doi: 10.1136/bmjopen-2011-000223 (PMC3221299; doi:10.1136/bmjopen-2011-000223), 2011-11-14

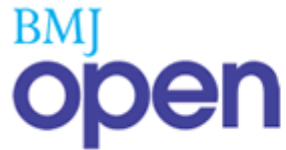

**A Phase I study evaluating the safety and immunogenicity of MVA85A, a candidate TB vaccine, in HIV-infected adults**

|                                 |                                                                                                                                                                                                                                                                                                                                                                                                                                                                                                                                                                                                                                                                                                                                                                                                                                                                                                                                                                                                                                                                                                                                                                                                                                            |
|---------------------------------|--------------------------------------------------------------------------------------------------------------------------------------------------------------------------------------------------------------------------------------------------------------------------------------------------------------------------------------------------------------------------------------------------------------------------------------------------------------------------------------------------------------------------------------------------------------------------------------------------------------------------------------------------------------------------------------------------------------------------------------------------------------------------------------------------------------------------------------------------------------------------------------------------------------------------------------------------------------------------------------------------------------------------------------------------------------------------------------------------------------------------------------------------------------------------------------------------------------------------------------------|
| Journal:                        | <i>BMJ Open</i>                                                                                                                                                                                                                                                                                                                                                                                                                                                                                                                                                                                                                                                                                                                                                                                                                                                                                                                                                                                                                                                                                                                                                                                                                            |
| Manuscript ID:                  | bmjopen-2011-000223                                                                                                                                                                                                                                                                                                                                                                                                                                                                                                                                                                                                                                                                                                                                                                                                                                                                                                                                                                                                                                                                                                                                                                                                                        |
| Article Type:                   | Research                                                                                                                                                                                                                                                                                                                                                                                                                                                                                                                                                                                                                                                                                                                                                                                                                                                                                                                                                                                                                                                                                                                                                                                                                                   |
| Date Submitted by the Author:   | 16-Jun-2011                                                                                                                                                                                                                                                                                                                                                                                                                                                                                                                                                                                                                                                                                                                                                                                                                                                                                                                                                                                                                                                                                                                                                                                                                                |
| Complete List of Authors:       | McShane, Helen; University of Oxford, The Jenner Institute<br>Minassian, Angela; University of Oxford, The Jenner Institute<br>Rowland, Rosalind; University of Oxford, The Jenner Institute<br>Beveridge, Natalie; University of Oxford, The Jenner Institute<br>Satti, Iman; University of Oxford, The Jenner Institute<br>Harris, Stephanie; University of Oxford, The Jenner Institute<br>Poyntz, Hazel; University of Oxford, The Jenner Institute<br>Hamill, Matthew; University of Oxford, The Jenner Institute<br>Griffiths, Kristin; University of Oxford, The Jenner Institute<br>Sander, Clare; University of Oxford, The Jenner Institute<br>Ambrozak, David; NIAID, Vaccine Research Center<br>Hill, Brenna; NIAID, Vaccine Research Center<br>Casazza, Joseph; NIAID, Vaccine Research Center<br>Douek, Daniel; NIAID, Vaccine Research Center<br>Koup, Richard; NIAID, Vaccine Research Center<br>Roederer, Mario; NIAID, Vaccine Research Center<br>Winston, Alan; Imperial College Healthcare NHS Trust<br>Ross, Jonathan; University Hospitals Birmingham NHS Foundation Trust<br>Williams, Nicola; University of Oxford, Centre for Statistics in Medicine<br>Pathan, Ansar; University of Oxford, The Jenner Institute |
| <b>Primary Subject Heading</b>: | Infectious diseases                                                                                                                                                                                                                                                                                                                                                                                                                                                                                                                                                                                                                                                                                                                                                                                                                                                                                                                                                                                                                                                                                                                                                                                                                        |
| Keywords:                       | Tuberculosis < INFECTIOUS DISEASES, HIV & AIDS < INFECTIOUS DISEASES, IMMUNOLOGY                                                                                                                                                                                                                                                                                                                                                                                                                                                                                                                                                                                                                                                                                                                                                                                                                                                                                                                                                                                                                                                                                                                                                           |
|                                 |                                                                                                                                                                                                                                                                                                                                                                                                                                                                                                                                                                                                                                                                                                                                                                                                                                                                                                                                                                                                                                                                                                                                                                                                                                            |

SCHOLARONE™  
Manuscripts

1  
2  
3  
4  
5 **A Phase I study evaluating the safety and immunogenicity of**  
6  
7 **MVA85A, a candidate TB vaccine, in HIV-infected adults**  
8  
9

10  
11  
12  
13 Angela M Minassian<sup>1</sup>, Rosalind Rowland<sup>1</sup>, Natalie ER Beveridge<sup>1</sup>, Ian D Poulton<sup>1</sup>,  
14  
15 Iman Satti<sup>1</sup>, Stephanie Harris<sup>1</sup>, Hazel Poyntz<sup>1</sup>, Matthew Hamill<sup>1</sup>, Kristin Griffiths<sup>1</sup>,  
16  
17 Clare R Sander<sup>1</sup>, David R Ambrozak<sup>2</sup>, David A Price<sup>3, 4</sup>, Brenna J Hill<sup>3</sup>, Joseph P  
18  
19 Casazza<sup>2</sup>, Daniel C Douek<sup>3</sup>, Richard A Koup<sup>2</sup>, Mario Roederer<sup>5</sup>, Alan Winston<sup>6</sup>,  
20  
21 Jonathan Ross<sup>7</sup>, Jackie Sherrard<sup>8</sup>, Guy Rooney<sup>9</sup>, Nicola Williams<sup>10</sup>, Alison M  
22  
23 Lawrie<sup>1</sup>, Helen A Fletcher<sup>1</sup>, Ansar A Pathan<sup>1\*</sup> and Helen McShane<sup>1</sup>  
24  
25  
26  
27  
28

29  
30 <sup>1</sup> The Jenner Institute, Old Road Campus Research Building, Oxford University, Oxford, OX3 7DQ,  
31  
32 UK

33  
34 <sup>2</sup> Immunology Laboratory, Vaccine Research Center, NIAID, National Institutes of Health, Bethesda,  
35  
36 Maryland, USA

37  
38 <sup>3</sup> Human Immunology Section, Vaccine Research Center, NIAID, National Institutes of Health,  
39  
40 Bethesda, Maryland, USA

41  
42 <sup>4</sup> Department of Infection, Immunity & Biochemistry, Cardiff University School of Medicine, Cardiff,  
43  
44 Wales, UK

45  
46 <sup>5</sup> Immuno-Technology Section, Vaccine Research Center, NIAID, National Institutes of Health,  
47  
48 Bethesda, Maryland, USA

49  
50 <sup>6</sup> Imperial College Healthcare NHS Trust, Praed Street, London, W2 1NY, UK

51  
52 <sup>7</sup> Selly Oak Hospital, Selly Oak, University Hospitals Birmingham NHS Foundation Trust, B29 6JD,  
53  
54 UK

55  
56 <sup>8</sup> Genito-urinary Medicine Department, Churchill Hospital, Oxford Radcliffe Hospitals NHS Trust,  
57  
58 Oxford, OX3 7LJ, UK

59  
60 <sup>9</sup> Great Western Hospital, Great Western Hospitals NHS Foundation Trust, Swindon, UK

<sup>10</sup> Centre for Statistics in Medicine, Wolfson College Annexe, University of Oxford, Linton Road,  
Oxford OX2 6UD

\* Now at Centre for Infection, Immunity and Disease Mechanisms, Biosciences, School of Health

1  
2  
3 Sciences and Social Care, Brunel University, Uxbridge UB8 3PH, West London, UK  
4  
5  
6  
7

8 Correspondence to Helen McShane, [helen.mcshane@ndm.ox.ac.uk](mailto:helen.mcshane@ndm.ox.ac.uk)  
9  
10

11 Short title: Phase I study with MVA85A in HIV  
12  
13  
14  
15  
16  
17  
18  
19  
20  
21  
22  
23  
24  
25  
26  
27  
28  
29  
30  
31  
32  
33  
34  
35  
36  
37  
38  
39  
40  
41  
42  
43  
44  
45  
46  
47  
48  
49  
50  
51  
52  
53  
54  
55  
56  
57  
58  
59  
60

For peer review only

**ABSTRACT**

**OBJECTIVES:** Control of the TB epidemic is a global health priority and one that is only likely to be achieved through vaccination. The critical overlap with the HIV epidemic requires any effective TB vaccine regimen to be safe in individuals who are infected with HIV. The objectives of this clinical trial were to evaluate the safety and immunogenicity of a leading candidate TB vaccine, MVA85A, in healthy, HIV-infected adults.

**DESIGN:** This was an open-label Phase I trial, performed in 20 healthy HIV-infected, antiretroviral-naïve subjects. Two different doses of MVA85A were each evaluated as a single immunisation in 10 subjects, with 24 weeks of follow-up. Safety of MVA85A was assessed by clinical and laboratory markers, including regular CD4 counts and HIV RNA load measurements. Vaccine immunogenicity was assessed by *ex-vivo* IFN- $\gamma$  ELISpot assays and flow cytometric analysis.

**RESULTS:** MVA85A was safe in subjects with HIV infection, with an adverse event profile comparable to previous trials in HIV-uninfected subjects. There were no clinically significant vaccine-related changes in CD4 count or HIV RNA load in any subjects, and no evidence from qPCR analyses to indicate that MVA85A vaccination leads to widespread preferential infection of vaccine-induced CD4+ T cell populations. Both doses of MVA85A induced an antigen-specific IFN- $\gamma$  response that was durable for 24 weeks, although of a lesser magnitude compared to HIV-uninfected subjects. The functional quality of the vaccine-induced T cell response in HIV-infected subjects was remarkably comparable, although less durable, to that observed in healthy HIV-uninfected controls.

1  
2  
3 **CONCLUSION:** MVA85A is safe and immunogenic in healthy adults infected with  
4  
5 HIV. Further safety and efficacy evaluation of this candidate vaccine in TB and HIV  
6  
7 endemic areas is therefore merited.  
8  
9

## 10 11 12 **ARTICLE SUMMARY SECTION**

### 13 14 **Article focus**

- 15  
16 • HIV infection increases susceptibility to TB, and globally, TB is the cause of  
17  
18 death in up to half of AIDS deaths  
19  
20
- 21  
22 • There is an urgent need for a safe and effective TB vaccine in HIV-infected  
23  
24 people  
25  
26

### 27 **Key messages**

- 28  
29 • MVA85A, a leading candidate TB vaccine, is safe and well tolerated in HIV-  
30  
31 infected people and does not induce changes in either CD4 count or HIV RNA  
32  
33 load  
34  
35
- 36  
37 • MVA85A is immunogenic in HIV-infected people, and induces a similar  
38  
39 immune profile to that seen in HIV-uninfected people, but the immunogenicity  
40  
41 is less durable in HIV-infected people.  
42  
43

### 44 **Strengths and limitations of this study**

- 45  
46 • This is a Phase I study with 20 subjects, and further studies are needed in TB  
47  
48 endemic countries in this important target population.  
49  
50

51  
52  
53  
54  
55 **Funding:** This study was supported by The Wellcome Trust (Grant number  
56  
57 WT076943MA), TBVAC (an EU 6<sup>th</sup> Framework programme grant) and The NIHR  
58  
59 Oxford Biomedical Research Centre.  
60

## INTRODUCTION

Tuberculosis (TB) and HIV are inextricably linked. At the end of 2007, approximately 33.2 million persons were living with Human Immune Deficiency Virus-1 (HIV) infection, an estimated one-third of whom were co-infected with *Mycobacterium tuberculosis* (*M. tuberculosis*)<sup>1</sup>. TB is the cause of death for up to half of all AIDS patients<sup>2</sup> and the increasing incidence of drug-resistant strains of *M. tuberculosis* poses a significant threat to a susceptible HIV-infected population<sup>3</sup>.

*Mycobacterium bovis* (*M. bovis*) Bacille Calmette Guérin (BCG) fails to protect consistently against the adult pulmonary form of TB, whilst providing reliable protection against disseminated infection in childhood<sup>4</sup>. An improved vaccine strategy is thus essential for global control of this disease<sup>5</sup>. MVA85A (modified vaccinia virus Ankara expressing antigen 85A) is a leading candidate TB vaccine, designed to enhance the effect of BCG; it is safe and highly immunogenic in healthy BCG-naïve and BCG-vaccinated subjects, and in subjects latently infected with *M. tuberculosis* in the UK and Africa<sup>6-11</sup>.

It is essential that any new TB vaccine is safe in an HIV-infected population. Subunit vaccines are an ideal choice for an immuno-compromised population in which the safety of replicating whole organism vaccines may be a concern. Although MVA is a live viral vaccine vector, it cannot replicate in human cells<sup>12, 13</sup>. There are now safety data from a number of clinical trials with recombinant MVAs in HIV-infected subjects, which demonstrate no sustained effect on either HIV load or CD4 count<sup>14-16</sup>. Most of these studies assessed immune-reconstituted HIV-infected individuals on anti-retroviral therapy (ARV); however, some ARV-naïve subjects with more advanced HIV infection have also been vaccinated with a recombinant MVA, with no

1  
2  
3 significant rise in HIV load or fall in CD4 count over a 4-week follow-up period <sup>17</sup>.  
4  
5 Preclinical studies in severely immuno-suppressed macaques have also documented  
6  
7 safety in this model <sup>18</sup>. To date, MVA85A has been administered to more than 1,000  
8  
9 individuals with no vaccine-related serious adverse events <sup>6, 8-11</sup> (McShane,  
10  
11 unpublished data).  
12  
13

14  
15 Here we present the first clinical trial of a subunit TB vaccine in an HIV-infected  
16  
17 population. This trial was designed to evaluate the safety and immunogenicity of two  
18  
19 doses of MVA85A in healthy HIV-infected subjects in the UK.  
20  
21  
22  
23  
24  
25  
26  
27  
28  
29  
30  
31  
32  
33  
34  
35  
36  
37  
38  
39  
40  
41  
42  
43  
44  
45  
46  
47  
48  
49  
50  
51  
52  
53  
54  
55  
56  
57  
58  
59  
60

## METHODS

### Trial design and participants

The protocol for this multi-site study was approved by the Medicines and Healthcare products Regulatory Agency (MHRA) and the Gene Therapy Advisory Committee (GTAC). Participants were recruited from the Genitourinary Medicine (GUM) departments at the Oxford Radcliffe Hospitals NHS Trust, University Hospitals Birmingham NHS Foundation Trust (Selly Oak Hospital), Great Western Hospitals NHS Foundation Trust, and Imperial College Healthcare NHS Trust, London.

Potentially eligible subjects were referred to the clinical trial team. Vaccination visits took place in Oxford; screening and follow-up visits took place at local NHS Trust sites. Written informed consent was obtained from all subjects prior to enrolment in the trial, and the referring HIV physicians were notified.

Eligibility required participants to be generally healthy, aged 18-55 years, with a normal chest radiograph and no clinical or radiological evidence of TB disease, a current CD4 count (measured at screening) of at least  $350 \times 10^6/L$ , a nadir CD4 count of not less than  $300 \times 10^6/L$  and an HIV RNA load at screening of less than 100,000 copies/mL. All subjects were diagnosed with HIV infection at least six months before screening and had not received any ARVs within the preceding six months (full inclusion/exclusion criteria, Supplemental Methods). In all cases, testing for latent *M. tuberculosis* infection (LTBI) was conducted at screening using an in-house *ex-vivo* interferon gamma (IFN- $\gamma$ ) ELISpot assay for ESAT6 and CFP10 peptides. Subjects found to be latently infected were referred back to their consultants for possible treatment at the end of the trial.

The trial was registered on a clinical trials database: ClinicalTrials.gov ID NCT00395720.



## Vaccine

Clinical grade MVA was produced under Good Manufacturing Practice standard by IDT Biologika GmbH.

## Procedures

Participants were vaccinated intradermally with either  $5 \times 10^7$  plaque-forming units (pfu; first group of 10 subjects) or  $1 \times 10^8$  pfu (second group of 10 subjects). A diary card was completed by all subjects recording local and systemic adverse events and body temperature for days 1 to 7 post-vaccination. All subjects were followed up regularly for 12 months; blood samples taken at each time-point for CD4 count, HIV RNA load measurement and cellular immunological assays. CD4 count and HIV RNA load results were communicated to the patient's HIV physician at regular intervals. Routine haematology and biochemistry assays were performed at weeks 1 and 12 after vaccination. All subjects attended their usual NHS follow-up appointments and received routine clinical care throughout the trial.

## Immunological assays

*Ex vivo* IFN- $\gamma$  ELISpot assays were performed at screening and at weeks 1, 2, 4, 12, and 24 post-vaccination using fresh peripheral blood mononuclear cells (PBMCs), as described previously<sup>10</sup>. A single pool of 15-mer peptides spanning the Ag85A protein (66, overlapping by 10 amino acids, 2 $\mu$ g/mL final concentration of each peptide in each well), and 7 pools of non-overlapping 9-10 Ag85A peptides (final concentration of 10 $\mu$ g/mL in each well) were used to stimulate for the IFN- $\gamma$  ELISpot assays. For the 7 peptide pool wells, the results were summed across all peptide pools for each time-point. This potentially resulted in duplicate counting of T cells that responded to any of the 10mer overlap regions, since any 10mer occurred in two pools with

1  
2  
3 adjacent peptides, but allows direct comparison with immunogenicity data from  
4  
5 previous trials.  
6

7  
8 Intracellular cytokine staining of PBMCs was performed as described previously <sup>19</sup>.  
9  
10 Briefly, cells were stained with the amine reactive LIVE/DEAD fixable dye ViViD  
11  
12 (Molecular Probes, Invitrogen) and then surface stained with monoclonal antibodies  
13  
14 against CD4, CD14, CD19, CD27, CD45RO, CD57 and CCR5. After washing, cells  
15  
16 were permeabilized (Cytofix/cytoperm kit; BD Pharmingen) and stained  
17  
18 intracellularly for CD3, CD8, IFN- $\gamma$ , TNF- $\alpha$ , IL-2 and MIP-1 $\beta$ . Naïve CD4+ memory  
19  
20 cells were identified as CD45RO-CD27+CD57+; memory CD4 T cell as  
21  
22 CD45RO+CD27 $\pm$ CD57 $\pm$ . CD4+ T cells producing two or more cytokines (IFN- $\gamma$ , IL-  
23  
24 2 or TNF- $\alpha$ ) following stimulation with Ag85A peptides were sorted to greater than  
25  
26 98% purity using a modified FACSaria flow cytometer (BD Biosciences); CMV-  
27  
28 specific CD4+ T cells, defined similarly, and bulk resting memory CD4+ T cells were  
29  
30 sorted simultaneously. Cytokine production and the expression of surface markers  
31  
32 were analysed using FlowJo version 8.7 (Tree Star Inc), Pestle version 1.5 and SPICE  
33  
34 version 4.1 (both from Mario Roederer, Vaccine Research Center, NIAID, NIH,  
35  
36 USA).  
37  
38  
39  
40  
41  
42

43  
44 Real-time quantitative PCR (qPCR) was used to determine the proportion of HIV-  
45  
46 infected Ag85A-specific CD4+ T cells; resting memory CD4+ T cells (non-Ag85A-  
47  
48 specific) and CMV-specific CD4+ T cells were used as intra-individual controls.  
49  
50 HIV-1 gag proviral DNA within sorted CD4+ T cell populations was quantified by  
51  
52 qPCR, as described previously <sup>20</sup>. qPCR was performed simultaneously for albumin  
53  
54 gene copy number in all sorted CD4+ T cell populations to quantify cell number in  
55  
56 each reaction.  
57  
58  
59  
60

1  
2  
3 CD4+ T cells from 12 subjects (4/10 in the low-dose group and 8/10 in the high-dose  
4  
5 group) were analysed for HIV *gag* content; low sort yields (less than 250 antigen-  
6  
7 specific CD4+T cells) prevented similar analyses in the remaining 8 subjects.  
8  
9

10 Serum levels of MIP-1 $\alpha$ , MIP-1 $\beta$ , RANTES, TNF- $\alpha$  and IL-2 were measured pre-  
11  
12 vaccination and at weeks one, two and 24 post-vaccination using FlowCytomix  
13  
14 simplex kits (Bender MedSystems). Serum was thawed and plated out in duplicate in  
15  
16 round-bottom 96-well plates. Samples were used neat for MIP-1 $\alpha$ , MIP-1 $\beta$ , TNF- $\alpha$   
17  
18 and IL-2, and diluted 1/10 for RANTES. Standards (provided) were reconstituted as  
19  
20 specified, and 1/3 serial dilutions plated in duplicate. Bead and biotin-conjugate  
21  
22 cocktails were added to each well in 25 $\mu$ L and 50 $\mu$ L volumes, respectively, and  
23  
24 incubated for two hours in the dark at room temperature. Samples were then washed  
25  
26 twice in 100 $\mu$ L Assay Buffer. Streptavidin-PE (50 $\mu$ L) and Assay Buffer (100 $\mu$ L) were  
27  
28 added and plates were incubated for one hour in the dark at room temperature.  
29  
30 Samples were then washed again and transferred to cluster tubes in 4%  
31  
32 paraformaldehyde in PBS (400 $\mu$ L) and acquired using an LSRII flow cytometer (BD  
33  
34 Biosciences) set up with the beads provided and the highest concentration standard;  
35  
36 the stopping gate was set so that at least 300 events were collected for each sample.  
37  
38 Data were analysed using FlowCytomixPro software (Bender MedSystems).  
39  
40  
41  
42  
43  
44  
45  
46  
47

### 48 **Statistical analysis**

49  
50 Peak (1 week) and plateau (24 weeks) CD4+ T cell responses were compared with  
51  
52 those at baseline using the Wilcoxon signed rank test, Stata Statistical Software,  
53  
54 Release 9.0. 2005 (Stata Corporation, College Station, TX). Area under the curve  
55  
56 (AUC) analysis was performed to compare the magnitude of vaccine-induced CD4+ T  
57  
58 cell responses in each dose group. Comparisons between this trial and previous trials  
59  
60

1  
2  
3 of MVA85A, and between low and high dose groups were conducted using the Mann-  
4  
5  
6 Whitney U test (Stata).

7  
8 Within-subject CD4 counts and HIV RNA load levels at weeks 1 and 24 post-  
9  
10 vaccination were compared with baseline levels, using a repeated measures analysis  
11  
12 of variance (*p*-values obtained from the F-test, Stata).

13  
14  
15 Non-parametric Spearman rank analyses were used to correlate immune assays and  
16  
17  
18 CD4/HIV RNA load with CD4+ T cell responses.  
19  
20  
21  
22  
23  
24  
25  
26  
27  
28  
29  
30  
31  
32  
33  
34  
35  
36  
37  
38  
39  
40  
41  
42  
43  
44  
45  
46  
47  
48  
49  
50  
51  
52  
53  
54  
55  
56  
57  
58  
59  
60

## RESULTS

Thirty-five individuals attended for screening between October 2006 and June 2009; 20 subjects were enrolled (Fig. 1, consort). The demographics of the 20 participants are shown in Table 1, and were comparable across the two groups.

Local reactions related to the MVA vaccine occur during the first week after vaccination and have been reported previously<sup>6, 7, 10</sup>. The local adverse event (AE) profile recorded in the diary cards of the HIV-infected subjects in this study was comparable to that observed in HIV-uninfected subjects, although pruritis appeared slightly higher in the HIV-infected group (Table 2a).

One subject in the low dose group experienced a single episode of fever greater than 37.5 °C (documented at 38.1°C). All other subjective systemic symptoms occurred with similar frequencies in the low dose and high dose groups (Table 2b).

Pre-vaccination CD4 counts and HIV RNA loads for all 20 subjects over a time period of one to six years before enrolment are shown in Figure 2. These longitudinal data illustrate the levels of natural fluctuation that occur over time and represent important baseline measurements for the interpretation of these parameters post-vaccination, also shown in Figure 2, in the absence of an unvaccinated control group. A repeated measures analysis of variance showed no evidence of a difference in either CD4 counts or HIV RNA load levels pre- and post- vaccination (low dose, CD4 count:  $p=0.35$ ; low dose, HIV RNA load:  $p=0.30$ ; high dose, CD4 count:  $p=0.83$ ; high dose, HIV RNA load:  $p=0.48$ ).

1  
2  
3 A major concern with respect to the vaccination of HIV-infected individuals is the  
4 possibility that responding antigen-specific CD4+ T cells will act as preferential  
5 targets for HIV infection as a function of their activated status, thereby enhancing the  
6 propagation of HIV and accelerating disease progression. In this study, however, there  
7 was no evidence for preferential HIV infection of Ag85A-specific CD4+ T cells. The  
8 median number of CD4+ T cells in Ag85A-specific qPCR reactions was 73 (95% CI:  
9 15-130 CD4+ T cells). Where possible, multiple time-points throughout the  
10 vaccination course for each subject were analyzed, to determine the proportion of  
11 Ag85A-specific CD4+ T cells that were infected with HIV. Of 32 Ag85A-specific  
12 CD4+ T cell samples in total (12 subjects), only three samples from two subjects  
13 showed a positive signal for HIV *gag* DNA by qPCR: subject 1004 (week 1 post-  
14 vaccination) and subject 1029 (weeks 2 and 8 post-vaccination) (data not shown). In  
15 all 12 subjects tested, resting HIV-specific memory cell populations showed a positive  
16 signal in all assays (data not shown). For CMV-specific CD4+ T cell populations,  
17 HIV *gag* DNA was detected in subjects 1004, 1029 and 1035 at the pre-vaccination  
18 time-points only (data not shown). All other samples were negative. In addition,  
19 vaccination had no effect on levels of MIP-1 $\alpha$ , MIP-1 $\beta$ , RANTES, TNF- $\alpha$  and IL-2 in  
20 unstimulated serum (data not shown).

21  
22 MVA85A induced significant antigen-specific T cell responses as measured by IFN- $\gamma$   
23 ELISpot assay (Fig. 3a-d, Table 3a). In the low dose group, the frequency of IFN- $\gamma$ -  
24 secreting T cells responding to the single 85A peptide pool at week one post-  
25 vaccination, increased by a median of 393 sfc/million compared to baseline  
26 ( $p=0.009$ ); there a significant increase remained until 24 weeks post-vaccination  
27 ( $p=0.032$ ). In the high dose group, a median increase of 502 sfc/million was apparent  
28 at week 1 post-vaccination ( $p=0.005$ ); again, this response was maintained until 24  
29  
30  
31  
32  
33  
34  
35  
36  
37  
38  
39  
40  
41  
42  
43  
44  
45  
46  
47  
48  
49  
50  
51  
52  
53  
54  
55  
56  
57  
58  
59  
60

1  
2  
3 weeks ( $p=0.048$ ). In both groups, T cell responses to the summed 85A peptide pools  
4 followed a similar pattern with a significant increase above baseline at week 1 (738  
5 and 1730 sfc/million for low and high dose groups, respectively), although, the week  
6  
7  
8  
9  
10  
11  
12  
13  
14  
15  
16  
17  
18  
19  
20  
21  
22  
23  
24  
25  
26  
27  
28  
29  
30  
31  
32  
33  
34  
35  
36  
37  
38  
39  
40  
41  
42  
43  
44  
45  
46  
47  
48  
49  
50  
51  
52  
53  
54  
55  
56  
57  
58  
59  
60

weeks ( $p=0.048$ ). In both groups, T cell responses to the summed 85A peptide pools followed a similar pattern with a significant increase above baseline at week 1 (738 and 1730 sfc/million for low and high dose groups, respectively), although, the week 24 response was only maintained significantly above baseline in the high dose group (low dose  $p=0.17$ ; high dose  $p=0.007$ ). There were no significant differences in the magnitude of the IFN- $\gamma$  response between low and high dose groups at any time-point ( $p=0.29$  and  $p=0.68$  for summed and single peptide pools, respectively; AUC analysis, data not shown). However the responder rate was higher in the high dose group with no observed non-responders compared with 1-2 non-responders (depending on antigen) in the low dose group. Overall, the kinetics of the Ag85A-specific T cell responses were very similar to those previously reported in similar studies of HIV-uninfected subjects<sup>6-11</sup>.

Ag85A-specific T cell responses in the low-dose group were significantly lower compared to those observed in previous studies of HIV-uninfected subjects (AUC analysis,  $p=0.02$ ; Table 3b). This difference was not significant at week 1  $p=0.12$ , which represents the peak response, but was significant at week 24 post-vaccination ( $p=0.004$ ; Table 3b, Figure 3e-g). There were no significant differences in baseline responses between the HIV-infected and HIV-uninfected groups ( $p=0.85$ ; Table 3b). Similarly, HIV-infected subjects in the high dose group exhibited significantly lower responses compared to HIV-uninfected subjects who received the same dose of MVA85A (AUC analysis,  $p=0.0001$ ; week 1 and week 24  $p = 0.0001$ ; Table 3b, Figure 3e-g). Again, baseline responses were comparable ( $p=0.24$ ) (Fig. 3).

There was a weak positive correlation between the CD4 count at screening and the peak summed 85A peptide pool response ( $R=0.04$ ,  $p=0.09$ ), and a weak negative correlation between HIV RNA load at screening and the peak immune response ( $R= -$

1  
2  
3 0.04,  $p=0.08$ ). There was a strong negative correlation between viral load at screening  
4 and the plateau immune response at week 24 ( $R= -0.8$ ,  $p=0.002$ ).  
5  
6

7  
8 Four subjects were found to have LTBI. However, there were no significant post-  
9 vaccination changes in the magnitude of ESAT-6/CFP10 responses in these subjects  
10 (data not shown).  
11  
12

13  
14 Ag85A-specific cytokine/chemokine production by CD4+ T cells prior to MVA85A  
15 vaccination was undetectable and increased significantly post-vaccination (Fig. 4a).  
16  
17 One week following MVA85A vaccination, more than 40% of Ag85A-specific CD4+  
18 T cells produced IFN- $\gamma$ , IL-2, MIP-1 $\beta$  and TNF- $\alpha$  simultaneously ( $p<0.01$ ); this  
19 remained significant at week 2 ( $p<0.05$ ). By week 8 post-vaccination, 60% of Ag85A-  
20 specific CD4+ T cells were still producing IFN- $\gamma$ , IL-2 and TNF- $\alpha$  simultaneously;  
21 production of IL-2 and IFN- $\gamma$  was maintained until 24 weeks. Production of MIP-1 $\beta$   
22 was not detected beyond week 2 post-vaccination (Fig. 4a, 5a). In the first two weeks  
23 post-vaccination, Ag85A-specific CD4+ T cells exhibited similar functional profiles  
24 in the HIV-infected groups, both low dose and high dose, and the "control" low dose  
25 HIV-uninfected group; in all cases, the responses were dominated by four functionally  
26 distinct subsets (Fig. 4b, c). IFN- $\gamma$  production measured by ICS correlated closely  
27 with IFN- $\gamma$  secretion observed in the ELISpot assay ( $R= 0.75$ ,  $p<0.0001$ ,  $n=45$ ; data  
28 not shown).  
29  
30

31  
32 Surface expression of the HIV M-tropic co-receptor CCR5 was monitored throughout  
33 the course of vaccination (Fig. 5). At week 1 post-vaccination, the MFI for CCR5 was  
34 highest in the activated Ag85A-specific CD4+ T cells, and lowest in the naïve CD4+  
35 T cell subsets. Using the integrated MFI (iMFI) function to account for cell  
36 frequencies, expression of CCR5 was highest in the memory CD4+ T cell pool (Fig.  
37 5d). No significant increase in CCR5 expression was detected in either the memory  
38  
39  
40  
41  
42  
43  
44  
45  
46  
47  
48  
49  
50  
51  
52  
53  
54  
55  
56  
57  
58  
59  
60



1  
2  
3 (Fig. 5e) or the total (Fig. 5f) CD4+ T cell populations as a result of MVA85A  
4  
5  
6 vaccination.  
7  
8  
9  
10  
11  
12  
13  
14  
15  
16  
17  
18  
19  
20  
21  
22  
23  
24  
25  
26  
27  
28  
29  
30  
31  
32  
33  
34  
35  
36  
37  
38  
39  
40  
41  
42  
43  
44  
45  
46  
47  
48  
49  
50  
51  
52  
53  
54  
55  
56  
57  
58  
59  
60

For peer review only

## DISCUSSION

This is the first Phase I trial of a subunit vectored TB vaccine in HIV-infected individuals. Similar studies in South Africa (*Tameris et al, unpublished data*) and Senegal (*Mboup et al, unpublished data*) are ongoing. The two main findings of this study are that MVA85A is safe in healthy subjects infected with HIV (a proportion of whom are co-infected with *M. tuberculosis*), and that MVA85A is immunogenic in this population, albeit at a lower level than in HIV-uninfected subjects.

The local and systemic AE profiles in this trial were comparable to those observed in HIV-uninfected subjects previously. Importantly, there were no statistically significant effects of vaccination on either CD4 count or HIV RNA load. It is important to understand the variability in these parameters during stable untreated HIV infection, to enable meaningful interpretation of fluctuations throughout the trial period. A recent quantitative review of cohort studies of HIV-infected adults suggests that, during stable untreated infection, intra-individual HIV RNA measurements can fluctuate over short periods of time by as much as 0.2-0.5 log<sub>10</sub> copies/mL, with measurement error and physiological fluctuation each contributing about 50% of this variation. CD4 counts can also vary within patients by 60-130 cells/uL within weeks, but there is less measurement error, and during stable infection the overall within-subject variation is proportionally larger for HIV RNA than for CD4 count<sup>21</sup>. In this study, we also observed greater intra-individual variations in HIV RNA load compared to CD4 counts. Only one subject in each group demonstrated a more than 0.5 log rise in HIV RNA load at week 24 post-vaccination. The first of these (low dose group, 008) had displayed a relatively high baseline HIV RNA load and low baseline CD4 count at screening, just within the inclusion criteria. As the rise in HIV

1  
2  
3 RNA load was only detectable 24 weeks after vaccination, it was considered highly  
4 unlikely that this was due to MVA85A vaccination. This subject commenced ARVs  
5 before week 24; all other subjects remained ARV-free throughout the trial period. The  
6 second subject (high dose group, 035) developed a rise in HIV RNA load between  
7 week 12 and week 24, peaking at just greater than a 0.5 log increase over baseline.  
8 However, this subject's HIV RNA load had been stable prior to this, so it was again  
9 deemed unlikely that this was a vaccination-related effect. Other fluctuations in the  
10 HIV RNA loads were observed, but any sustained rise was well within the expected  
11 0.5 log variation.  
12  
13  
14  
15  
16  
17  
18  
19  
20  
21  
22  
23

24 HIV preferentially infects memory CD4+ T cells<sup>22, 23</sup>, in particular HIV-specific  
25 memory CD4+ T cells,<sup>20</sup> and other activated antigen-specific CD4+ T cells<sup>24</sup>. Using  
26 a sensitive qPCR method, we detected HIV *gag* DNA in Ag85A-specific CD4+ T  
27 cells from only 2/12 subjects post-vaccination. This low positivity rate concurs with  
28 the stable CD4 count and HIV RNA load parameters in most subjects throughout the  
29 trial. Although the qPCR assay is sensitive, the low yield of Ag85A-specific CD4+ T  
30 cells entering the assay is an important limitation and provides just a snapshot of the  
31 HIV burden within the Ag85A-specific CD4+ T cell pool. However, these data  
32 suggest that MVA85A vaccination of healthy HIV-infected individuals does not lead  
33 to widespread preferential infection and depletion of vaccine-induced CD4+ T cell  
34 populations in the periphery. In addition, the lack of effect of vaccination on  
35 chemokine and cytokine levels in unstimulated serum supports the interpretation that  
36 vaccination with MVA85A did not lead to widespread immune activation in this  
37 subject group.  
38  
39  
40  
41  
42  
43  
44  
45  
46  
47  
48  
49  
50  
51  
52  
53  
54  
55  
56  
57  
58  
59  
60

1  
2  
3 We have shown that vaccine-induced immunogenicity, while of moderate magnitude,  
4 is significantly lower than in healthy HIV-uninfected subjects given the same dose of  
5 MVA85A. Thus, additional strategies may be required to augment immune responses  
6 to MVA85A vaccination in the context of HIV infection. Partial reconstitution of the  
7 immune system with ARVs may improve the response to vaccination. Indeed, this  
8 study shows that the baseline HIV RNA level is a strong negative predictor of  
9 summed 85A peptide pool responses at week 24 post-vaccination. In addition, a  
10 booster vaccination with MVA85A may be required to enhance the vaccine-induced  
11 immune response.  
12  
13  
14  
15  
16  
17  
18  
19  
20  
21  
22  
23  
24  
25  
26

27 The functional profile of Ag85A-specific CD4+ T cells observed in this study was  
28 remarkably comparable to that of healthy HIV-uninfected subjects<sup>19</sup> and *M.*  
29 *tuberculosis*-infected subjects<sup>10</sup>, although the response in HIV-infected subjects is  
30 less durable. IFN- $\gamma$  and TNF- $\alpha$  are known to be important for protective immunity to  
31 TB, and these cytokines dominated the MVA85A vaccine-induced CD4+ T cell  
32 response elicited in the current study cohort. In this study, production of MIP-1 $\beta$  by  
33 Ag85A-specific CD4+ T cells was not detectable after week 2 post-vaccination. The  
34 production of multiple cytokines including IL-2 and MIP-1 $\beta$  by HIV-specific CD8+ T  
35 cells is associated with long-term non-progression, albeit with uncertain causality<sup>25</sup>.  
36 The production of  $\beta$ -chemokines by CD8+ T cells was not assessed here as there were  
37 no detectable Ag-85A specific CD8+ T cell responses pre- or post-vaccination.  
38  
39  
40  
41  
42  
43  
44  
45  
46  
47  
48  
49  
50  
51  
52  
53  
54  
55

56 Vaccine-induced bystander activation of CD4+ T cells in HIV-infected subjects is  
57 likely to be undesirable because activated CD4+ T cells are at increased risk of HIV  
58 infection. The overall pattern of cytokine production and the frequency of CMV-  
59  
60

1  
2  
3 specific CD4+ T cell producing cytokines remained both relatively stable over the 24-  
4 week period following MVA85A vaccination, and comparable to pre-vaccination  
5 responses (Supplemental Figure 1). These data suggest that MVA85A vaccination  
6 does not induce substantial bystander activation of antigen-specific CD4+ T cell  
7 populations.  
8  
9  
10  
11  
12  
13  
14  
15  
16

17 Demonstrating the safety and immunogenicity of a new TB vaccine in an important  
18 target population is a crucial step, but does not mean that the vaccine will be effective.  
19  
20 However, the data presented here support further safety and immunogenicity studies  
21 of this candidate vaccine, together with proof-of-concept efficacy trials, in TB and  
22 HIV endemic areas.  
23  
24  
25  
26  
27  
28  
29  
30  
31  
32  
33  
34  
35  
36  
37  
38  
39  
40  
41  
42  
43  
44  
45  
46  
47  
48  
49  
50  
51  
52  
53  
54  
55  
56  
57  
58  
59  
60

**Authors' Contributions:**

Concept and design of study, and obtaining funding: HMcS.

Protocol writing: HMcS, CRS, AMM.

Recruitment, vaccination and follow-up of volunteers: AMM, RR, MH, AW, JR.

Immunology assays and analysis: AAP, NERB, IS, SH, HP.

Collaboration and contribution of reagents/materials/analysis tools: DRA, JPC, DCD, RAK, MR.

Data analysis: AMM, RR, AAP, NW, NERB, HMcS.

Writing of the paper: AMM, HMcS, with contributions from all authors.

**Conflict of Interest Statement:** AAP and HMcS are named inventors on a composition of matter patent for MVA85A filed by the University of Oxford, and are shareholders in a Joint Venture formed for the further development of this vaccine.

**Acknowledgements:**

We thank Ian Poulton, Dr Janet Scott, Dr Jackie Sherrard, Dr Guy Rooney and the clinical research nurses in Oxford, at St. Mary's Hospital in London and at Selly Oak Hospital in Birmingham, especially Kenneth Legg and Jan Harding, for their invaluable assistance in identification, recruitment and follow-up of eligible subjects.

We thank Dr Alison Lawrie for project management support. We also thank Professors Adrian Hill and David Price and Dr Helen Fletcher for discussions. Oxford University was the sponsor for this clinical trial. HMcS is a Wellcome Trust Senior Clinical Research Fellow and a Jenner Institute Investigator.

## REFERENCES

1. Dye C, Lonnroth K, Jaramillo E, Williams BG, Raviglione M. Trends in tuberculosis incidence and their determinants in 134 countries. *Bull World Health Organ.* 2009 Sep;87(9):683-91.
2. World Health Organization, "Global Tuberculosis Control: A Short Update To The 2009 Report" WHO. 2009:6-32.
3. Matteelli A, Migliori GB, Cirillo D, Centis R, Girard E, Raviglione M. Multidrug-resistant and extensively drug-resistant Mycobacterium tuberculosis: epidemiology and control. *Expert Rev Anti Infect Ther.* 2007 Oct;5(5):857-71.
4. Colditz GA, Brewer TF, Berkey CS, Wilson ME, Burdick E, Fineberg HV, et al. Efficacy of BCG vaccine in the prevention of tuberculosis. Meta-analysis of the published literature. *JAMA.* 1994 Mar 2;271(9):698-702.
5. Minassian A. Tuberculosis vaccines: present and future. *Expert Reviews in Respiratory Medicine.* 2008;2(6):721-38.
6. McShane H, Pathan AA, Sander CR, Keating SM, Gilbert SC, Huygen K, et al. Recombinant modified vaccinia virus Ankara expressing antigen 85A boosts BCG-primed and naturally acquired antimycobacterial immunity in humans. *Nat Med.* 2004 Nov;10(11):1240-4.
7. Pathan AA, Sander CR, Fletcher HA, Poulton I, Alder NC, Beveridge NE, et al. Boosting BCG with recombinant modified vaccinia ankara expressing antigen 85A: different boosting intervals and implications for efficacy trials. *PLoS One.* 2007;2(10):e1052.
8. Hawkrigde T, Scriba TJ, Gelderbloem S, Smit E, Tameris M, Moyo S, et al. Safety and immunogenicity of a new tuberculosis vaccine, MVA85A, in healthy adults in South Africa. *J Infect Dis.* 2008 Aug 15;198(4):544-52.
9. Brookes RH, Hill PC, Owiafe PK, Ibanga HB, Jeffries DJ, Donkor SA, et al. Safety and immunogenicity of the candidate tuberculosis vaccine MVA85A in West Africa. *PLoS One.* 2008;3(8):e2921.
10. Sander CR, Pathan AA, Beveridge NE, Poulton I, Minassian A, Alder N, et al. Safety and immunogenicity of a new tuberculosis vaccine, MVA85A, in Mycobacterium tuberculosis-infected individuals. *Am J Respir Crit Care Med.* 2009 Apr 15;179(8):724-33.
11. Scriba TJ, Tameris M, Mansoor N, Smit E, van der Merwe L, Isaacs F, et al. Modified vaccinia Ankara-expressing Ag85A, a novel tuberculosis vaccine, is safe in adolescents and children, and induces polyfunctional CD4+ T cells. *Eur J Immunol.* Jan;40(1):279-90.
12. Carroll MW, Moss B. Host range and cytopathogenicity of the highly attenuated MVA strain of vaccinia virus: propagation and generation of recombinant viruses in a nonhuman mammalian cell line. *Virology.* 1997 Nov 24;238(2):198-211.
13. Meyer H, Sutter G, Mayr A. Mapping of deletions in the genome of the highly attenuated vaccinia virus MVA and their influence on virulence. *J Gen Virol.* 1991 May;72 ( Pt 5):1031-8.
14. Cosma A, Nagaraj R, Buhler S, Hinkula J, Busch DH, Sutter G, et al. Therapeutic vaccination with MVA-HIV-1 nef elicits Nef-specific T-helper cell responses in chronically HIV-1 infected individuals. *Vaccine.* 2003 Dec 8;22(1):21-9.
15. Harrer E, Bauerle M, Ferstl B, Chaplin P, Petzold B, Mateo L, et al. Therapeutic vaccination of HIV-1-infected patients on HAART with a recombinant HIV-1 nef-expressing MVA: safety, immunogenicity and influence on viral load during treatment interruption. *Antivir Ther.* 2005;10(2):285-300.

16. Dorrell L, Williams P, Suttill A, Brown D, Roberts J, Conlon C, et al. Safety and tolerability of recombinant modified vaccinia virus Ankara expressing an HIV-1 gag/multiepitope immunogen (MVA.HIVA) in HIV-1-infected persons receiving combination antiretroviral therapy. *Vaccine*. 2007 Apr 30;25(17):3277-83.
17. Bejon P, Peshu N, Gilbert SC, Lowe BS, Molyneux CS, Forsdyke J, et al. Safety profile of the viral vectors of attenuated fowlpox strain FP9 and modified vaccinia virus Ankara recombinant for either of 2 preerythrocytic malaria antigens, ME-TRAP or the circumsporozoite protein, in children and adults in Kenya. *Clin Infect Dis*. 2006 Apr 15;42(8):1102-10.
18. Stittelaar KJ, Kuiken T, de Swart RL, van Amerongen G, Vos HW, Niesters HG, et al. Safety of modified vaccinia virus Ankara (MVA) in immune-suppressed macaques. *Vaccine*. 2001 Jun 14;19(27):3700-9.
19. Beveridge NE, Price DA, Casazza JP, Pathan AA, Sander CR, Asher TE, et al. Immunisation with BCG and recombinant MVA85A induces long-lasting, polyfunctional Mycobacterium tuberculosis-specific CD4+ memory T lymphocyte populations. *Eur J Immunol*. 2007 Nov;37(11):3089-100.
20. Douek DC, Brenchley JM, Betts MR, Ambrozak DR, Hill BJ, Okamoto Y, et al. HIV preferentially infects HIV-specific CD4+ T cells. *Nature*. 2002 May 2;417(6884):95-8.
21. Korenromp EL, Williams BG, Schmid GP, Dye C. Clinical prognostic value of RNA viral load and CD4 cell counts during untreated HIV-1 infection--a quantitative review. *PLoS One*. 2009;4(6):e5950.
22. Schnittman SM, Lane HC, Greenhouse J, Justement JS, Baseler M, Fauci AS. Preferential infection of CD4+ memory T cells by human immunodeficiency virus type 1: evidence for a role in the selective T-cell functional defects observed in infected individuals. *Proc Natl Acad Sci U S A*. 1990 Aug;87(16):6058-62.
23. Brenchley JM, Hill BJ, Ambrozak DR, Price DA, Guenaga FJ, Casazza JP, et al. T-cell subsets that harbor human immunodeficiency virus (HIV) in vivo: implications for HIV pathogenesis. *J Virol*. 2004 Feb;78(3):1160-8.
24. Lore K, Smed-Sorensen A, Vasudevan J, Mascola JR, Koup RA. Myeloid and plasmacytoid dendritic cells transfer HIV-1 preferentially to antigen-specific CD4+ T cells. *J Exp Med*. 2005 Jun 20;201(12):2023-33.
25. Casazza JP, Brenchley JM, Hill BJ, Ayana R, Ambrozak D, Roederer M, et al. Autocrine production of beta-chemokines protects CMV-Specific CD4 T cells from HIV infection. *PLoS Pathog*. 2009 Oct;5(10):e1000646.



## TABLE and FIGURE LEGENDS

**Table 1** *Subject demographics*: Comparison of low and high dose vaccination groups.

**Tables 2a and b** *Local and systemic adverse events*: Comparison of low and high dose vaccination groups with dose-matched HIV-uninfected subjects from previous trials of MVA85A. There were significantly fewer systemic AEs per person, (and a lower frequency of systemic AEs overall,) in the 10 HIV-infected subjects receiving high dose MVA85A compared with HIV-uninfected subjects receiving the same dose of vaccine ( $p=0.026$ , data not shown and Pathan *et al*, unpublished)

**Table 3a** *Ex-vivo IFN- $\gamma$  ELISpot statistics (1)*: Comparison of screening, week 1 and week 24 responses within low and high dose groups, for both summed and single pooled peptides, using Wilcoxon signed rank test. Median (range), median difference (range, of week 1 and week 24 responses compared to screening,) and  $p$ -values are shown.

**Table 3b** *Ex-vivo IFN- $\gamma$  ELISpot statistics (2)*: Comparison of responses between HIV-infected and HIV-uninfected subjects, at each time-point and each vaccine dose, using Mann-Whitney U test. Median (range), difference in medians (with 95% confidence intervals), and  $p$ -values are shown. AUC analysis is also shown.

**Figure 1** *Consort flowcharts*. Follow-up was conducted for 24 weeks post-vaccination in both the low dose MVA85A ( $5 \times 10^7$  pfu; left panels) and high dose MVA85A ( $1 \times 10^8$  pfu; right panels) groups. Of the volunteers excluded at screening,

1  
2  
3 5/15 had CD4 counts  $<350 \times 10^6/L$  and/or exhibited progressively decreasing CD4  
4  
5  
6 counts, 2/15 had HIV RNA loads of  $>100,000$  copies/mL, 2/15 had abnormal chest  
7  
8 radiographs, 1/15 had a current history of active eczema, and 1/15 had a history of  
9  
10 illicit drug usage and unstable depression; the remaining 4/15 were eligible but failed  
11  
12 to attend for vaccination (2 in each dose group).  
13  
14  
15

16  
17 **Figure 2 (a-d)** *Comparison of pre and post-vaccination CD4 counts:* Longitudinal  
18  
19 CD4 counts of subjects in the low dose ( $5 \times 10^7$  pfu MVA85A) group pre-vaccination,  
20  
21 **(a)**; and high dose ( $1 \times 10^8$  pfu MVA85A) group **(c)** pre-vaccination. Longitudinal CD4  
22  
23 counts post-vaccination (up to 24 weeks) in the low dose **(b)** and high dose **(d)**  
24  
25 groups. NB X-axis for the pre-vaccination data is not standardised for time but varies  
26  
27 from 1-6 years depending on the individual subject. **(e-h)** *Comparison of pre and post-*  
28  
29 *vaccination HIV RNA loads:* Longitudinal HIV RNA loads of subjects in the low dose  
30  
31 **(e)** and high dose **(g)** groups pre-vaccination. Longitudinal HIV RNA loads post-  
32  
33 vaccination (up to 24 weeks) in the low dose **(f)** and high dose **(h)** groups.  
34  
35 Anonymous number codes (001-036) shown in key. NB X-axis for the pre-  
36  
37 vaccination data is not standardised for time but varies from 1-6 years depending on  
38  
39 the individual subject.  
40  
41  
42  
43  
44  
45  
46  
47

48 **Figure 3 (a-d)** *IFN- $\gamma$  ELISpot responses in the low dose and high dose groups.*  
49  
50 *Longitudinal* responses to the single 85A peptide pool are shown for the low dose  
51  
52 ( $5 \times 10^7$  pfu MVA85A) group, **(a)** and high dose ( $1 \times 10^8$  pfu MVA85A) group **(b)**.  
53  
54 Longitudinal responses to the summed 85A peptide pools are shown for the low dose  
55  
56 **(c)** and high dose **(d)** groups. Horizontal bars represent the median response.  
57  
58  
59  
60

1  
2  
3  
4 *Comparison of IFN- $\gamma$  ELISpot responses in HIV-infected and HIV-uninfected subjects*  
5  
6 (e-g). Responses to summed 85A peptide pools for low dose and high dose vaccine  
7  
8 regimes at screening (e); week 1 post-vaccination (f) and week 24 post-vaccination  
9  
10 (g). Subjects with LTBI are denoted with grey symbols. Statistically significant  
11  
12 differences in the responses between HIV-infected and HIV-uninfected subjects were  
13  
14 assessed using the Mann-Whitney U test. \* $p < 0.05$ ; \*\* $p < 0.01$ ; \*\*\* $p < 0.001$ . Horizontal  
15  
16 bars represent the median response.  
17  
18

19  
20  
21  
22 **Figure 4** *MVA85A induces polyfunctional Ag85A-specific CD4+ T cells in HIV-*  
23 *infected individuals.* MVA85A vaccination-induced production of IFN- $\gamma$ , IL-2, MIP-  
24  
25 1 $\beta$  and TNF- $\alpha$  by antigen-specific CD4+ T cells was assessed following Ag85A  
26  
27 peptide stimulation of cryopreserved PBMC using polychromatic flow cytometry. (a)  
28  
29 Individual data points are shown with median line, interquartile range (open bars) and  
30  
31 range (whiskers) at baseline and at each time-point post-vaccination for every  
32  
33 possible combination of cytokine/chemokine production. High dose and low dose  
34  
35 groups were analyzed together (n=17). (b) The functional profile of the Ag85A-  
36  
37 specific CD4+ T cell response is summarized in the pie charts (n=17). CD4+ T cells  
38  
39 producing a given number of cytokines/chemokines are grouped and colour-coded  
40  
41 together. Pie charts are shown for the high dose HIV-infected group (n=9), the low  
42  
43 dose HIV-infected group (n=8) and low dose healthy controls (n=6). (c) Absolute  
44  
45 percentages of the highest frequency CD4+ T cell subsets producing specific  
46  
47 combinations of chemokine/cytokines at week 1 post-vaccination across the different  
48  
49 groups; \*  $p < 0.05$ , \*\*  $p < 0.01$ .  
50  
51  
52  
53  
54  
55  
56  
57  
58  
59  
60

**Figure 5** *Cytokine/chemokine production and receptor expression*

1  
2  
3  
4 (a) Absolute percent of Ag85A-specific CD4+ T cells producing IL-2 or MIP-1 $\beta$  at  
5  
6 week 1 post-MVA85A vaccination in HIV-infected subjects (low dose and high dose,  
7  
8 n=17) versus healthy controls (n=6). Representative histogram (b) and scatter plot (c)  
9  
10 showing CCR5 median fluorescence intensity (MFI) in naïve CD4+ T cells, memory  
11  
12 CD4+ T cells and activated Ag85A-specific CD4+ T cells at week 1 post-  
13  
14 vaccination (n=16 in all groups). (d) Scatter plot showing CCR5 integrated MFI  
15  
16 (iMFI) for naïve, memory and Ag85A-specific CD4+ T cells (n=16). Line charts  
17  
18 showing CCR5 MFI in memory CD4+ T cells (e) and the total CD4+ T cell  
19  
20 population (f) across the MVA85A vaccination time-course (n=16). \*  $p<0.05$ , \*\*  
21  
22  $p<0.01$ .  
23  
24  
25  
26  
27  
28  
29  
30  
31  
32  
33  
34  
35  
36  
37  
38  
39  
40  
41  
42  
43  
44  
45  
46  
47  
48  
49  
50  
51  
52  
53  
54  
55  
56  
57  
58  
59  
60

TABLE 1

| Demographics and screening results |               | Low dose<br>5x10 <sup>7</sup> pfu | High dose<br>1x10 <sup>8</sup> pfu |
|------------------------------------|---------------|-----------------------------------|------------------------------------|
| Sex                                | Male          | 9 (90%)                           | 8 (80%)                            |
|                                    | Female        | 1 (10%)                           | 2 (20%)                            |
| Median age (range)                 |               | 35.8 (21-52)                      | 35.1 (27-46)                       |
| Continent of Birth                 | Africa        | 4 (40%)                           | 4 (40%)                            |
|                                    | Asia          | 0                                 | 1 (10%)                            |
|                                    | Europe        | 4 (40%)                           | 5 (40%)                            |
|                                    | North America | 1 (10%)                           | 0                                  |
|                                    | South America | 1 (10%)                           | 0                                  |
| BCG                                | Definite      | 7 (70%)                           | 10 (100%)                          |
|                                    | Uncertain     | 3 (30%)                           | 0 (0%)                             |
| Latent infection (ESAT-6/CFP-10 +) |               | 2 (20%)                           | 3 (30%)                            |
| Median CD4 count (range)           |               | 570<br>(430-1200)                 | 625<br>(410-840)                   |
| Median HIV RNA load (range)        |               | 6069 (39-<br>41890)               | 14805 (49-<br>71090)               |

TABLE 2

(a)

| Local Adverse Events | HIV-infected               |                               | HIV-negative                  |                               |                               |
|----------------------|----------------------------|-------------------------------|-------------------------------|-------------------------------|-------------------------------|
|                      | Dose<br>Number of subjects | 5x10 <sup>7</sup> pfu<br>n=10 | 1x10 <sup>8</sup> pfu<br>n=10 | 5x10 <sup>7</sup> pfu<br>n=43 | 1x10 <sup>8</sup> pfu<br>n=12 |
| Redness              |                            | 10 (100%)                     | 10 (100%)                     | 42 (98%)                      | 12 (100%)                     |
| Pruritis             |                            | 10 (100%)                     | 9 (90%)                       | 22 (51%)                      | 8 (67%)                       |
| Pain                 |                            | 8 (80%)                       | 7 (70%)                       | 36 (84%)                      | 12 (100%)                     |
| Induration           |                            | 10 (100%)                     | 10 (100%)                     | 42 (98%)                      | 12 (100%)                     |

(b)

| Systemic Adverse Events            | HIV-infected               |                               | HIV-negative                  |                               |                               |
|------------------------------------|----------------------------|-------------------------------|-------------------------------|-------------------------------|-------------------------------|
|                                    | Dose<br>Number of subjects | 5x10 <sup>7</sup> pfu<br>n=10 | 1x10 <sup>8</sup> pfu<br>n=10 | 5x10 <sup>7</sup> pfu<br>n=43 | 1x10 <sup>8</sup> pfu<br>n=12 |
| Fever                              |                            | 1 (10%)                       | 0 (0%)                        | 3 (7%)                        | 5 (42%)                       |
| Feverish                           |                            | 3 (30%)                       | 2 (20%)                       | 17 (40%)                      | 9 (75%)                       |
| Arthralgia                         |                            | 2 (20%)                       | 3 (30%)                       | 6 (14%)                       | 7 (58%)                       |
| Headache                           |                            | 6 (60%)                       | 4 (40%)                       | 21 (49%)                      | 10 (83%)                      |
| Myalgia                            |                            | 1 (10%)                       | 2 (20%)                       | 18 (42%)                      | 9 (75%)                       |
| Nausea                             |                            | 1 (10%)                       | 0 (0%)                        | 4 (9%)                        | 4 (33%)                       |
| Vasovagal syncope                  |                            | 0 (0%)                        | 1 (10%)                       | 0 (0%)                        | 0 (0%)                        |
| Axillary lymphadenopathy           |                            | 1 (10%)                       | 0 (0%)                        | 2 (5%)                        | 2 (17%)                       |
| Change in haematology/biochemistry |                            | 0 (0%)                        | 0 (0%)                        | 0 (0%)                        | 0 (0%)                        |

TABLE 3

(a)

## Summed pooled peptides – within dose changes from screening to peak and plateau

| Dose |                                                   | Screening<br>(n=10) | Week 1<br>(n=10) | Week 24<br>(n=10)   |
|------|---------------------------------------------------|---------------------|------------------|---------------------|
| Low  | Median (range)                                    | 10 (3, 20)          | 738 (109, 4398)  | 20 (0, 237) n=9     |
|      | Median difference (range) (compared to screening) |                     | 730 (109, 4383)  | 17 (-8, 218)<br>n=9 |
|      | <i>p</i> -value*                                  |                     | 0.007            | 0.17                |
| High | Median (range)                                    | 3 (0, 14)           | 1730 (758, 2138) | 42 (33, 256)        |
|      | Median difference (range) (compared to screening) |                     | 1721 (743, 2135) | 42 (27, 247)        |
|      | <i>p</i> -value*                                  |                     | 0.005            | 0.007               |

\*Wilcoxon signed rank test

## Single pooled peptides – within dose changes from screening to peak and plateau

| Dose |                                                   | Screening<br>(n=10) | Week 1<br>(n=10)      | Week 24<br>(n=10) |
|------|---------------------------------------------------|---------------------|-----------------------|-------------------|
| Low  | Median (range)                                    | 0 (0, 8) n=9        | 393 (67, 1275) n=9    | 13 (2, 103) n=9   |
|      | Median difference (range) (compared to screening) |                     | 393 (60, 1272)<br>n=9 | 13 (2, 97)<br>n=9 |
|      | <i>p</i> -value*                                  |                     | 0.009                 | 0.032             |
| High | Median (range)                                    | 0 (0, 8)            | 502 (312, 677)        | 14 (0, 68)        |
|      | Median difference (range) (compared to screening) |                     | 502 (294, 677)        | 14 (0, 66)        |
|      | <i>p</i> -value*                                  |                     | 0.005                 | 0.048             |

\*Wilcoxon signed rank test

1  
2  
3  
4  
5  
6  
7  
8  
9  
10  
11  
12  
13  
14  
15  
16  
17  
18  
19  
20  
21  
22  
23  
24  
25  
26  
27  
28  
29  
30  
31  
32  
33  
34  
35  
36  
37  
38  
39  
40  
41  
42  
43  
44  
45  
46  
47

(b)

HIV-infected vs. HIV-negative group

|                      | Summed Pooled peptides | Median (range) HIV+           | Median (range) HIV-             | Difference in medians^<br>(95% confidence interval) | p-value* |
|----------------------|------------------------|-------------------------------|---------------------------------|-----------------------------------------------------|----------|
| Week 1               | Low dose               | 738<br>(109, 4398)<br>n=10    | 2147<br>(1173, 5085)<br>n=21    | 1101<br>(-393, 2873)                                | 0.12     |
|                      | High dose              | 1730<br>(758, 2138)<br>n=10   | 6493<br>(4854, 7312)<br>n=12    | 4557<br>(3038, 5904)                                | 0.0001   |
| Week 24              | Low dose               | 20<br>(0, 237)<br>n=9         | 385<br>(228, 1010)<br>n=20      | 339<br>(161, 534)                                   | 0.004    |
|                      | High dose              | 42<br>(33, 256)<br>n=10       | 970<br>(655, 1199)<br>n=12      | 820<br>(569, 1050)                                  | 0.0001   |
| Area under the curve | Low dose               | 2162<br>(519, 23348)<br>n=9   | 16317<br>(9129, 36418)<br>n=20  | 11884<br>(3191, 17387)                              | 0.02     |
|                      | High dose              | 5929<br>(3167, 11607)<br>n=10 | 41575<br>(26919, 53807)<br>n=12 | 31384<br>(20778, 45504)                             | 0.0001   |

\*Mann Whitney U test

^The method used to calculate the 'difference in medians' does not simply subtract one median from the other. All possible pairwise differences between the 2 groups are calculated and the median of these differences is obtained. Hence the 'difference in medians' are not exactly the differences between the entries in the 'median' columns.



Figure 1

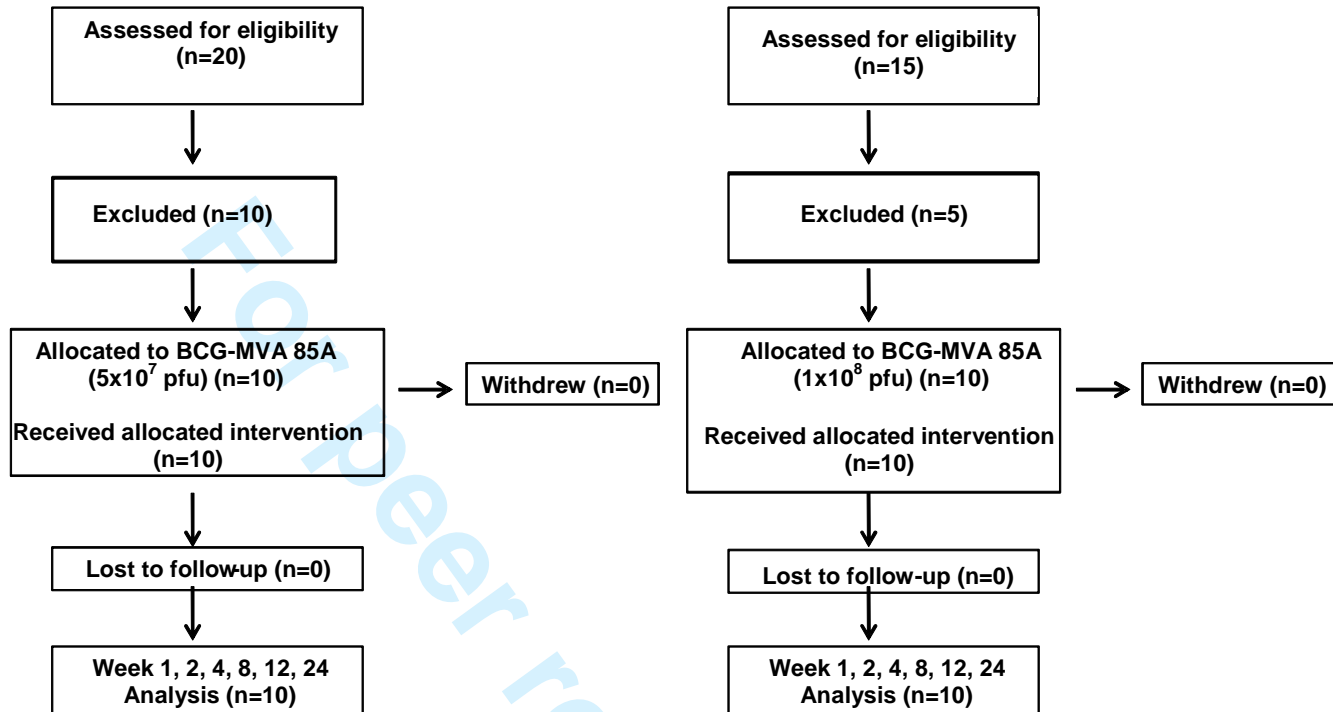

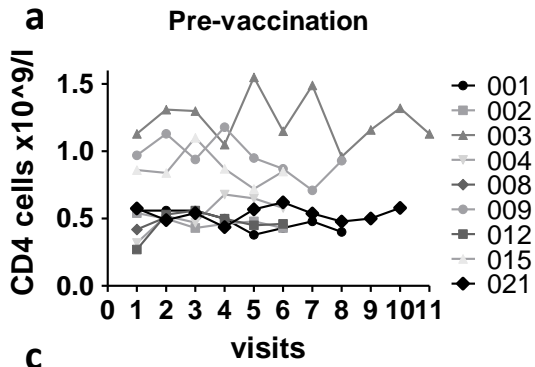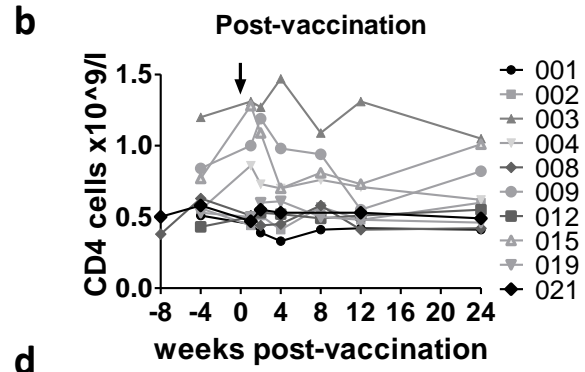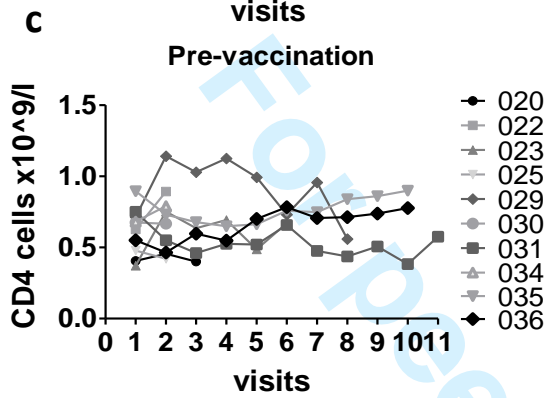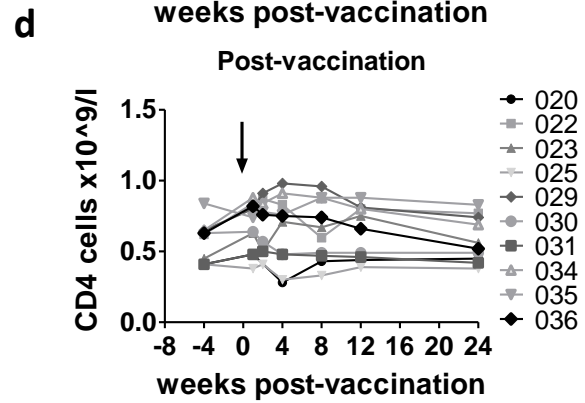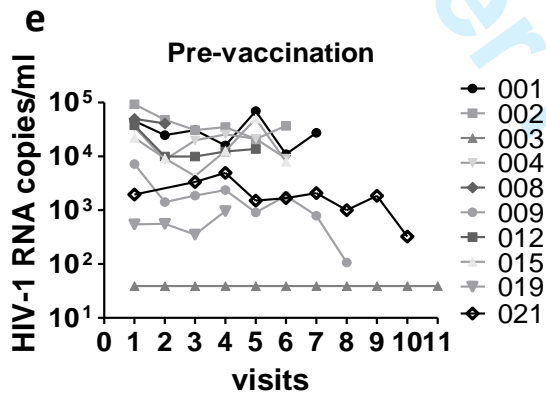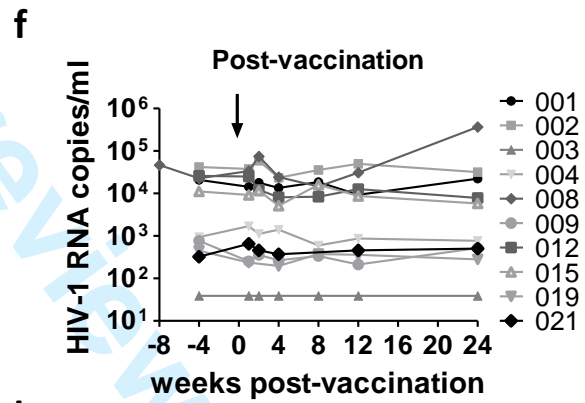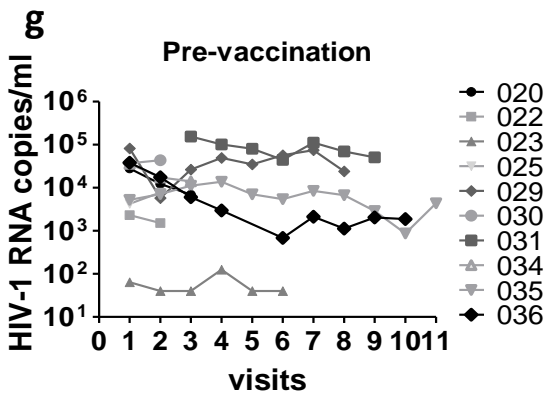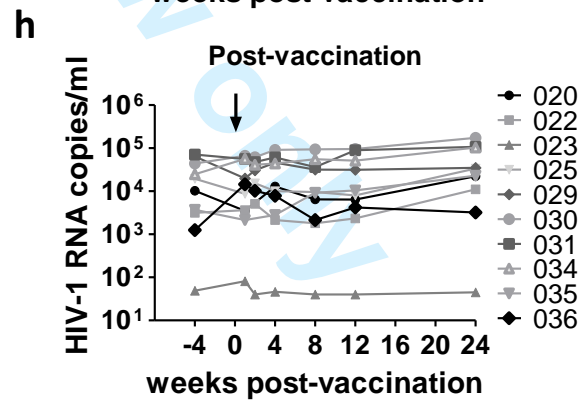

Figure 3

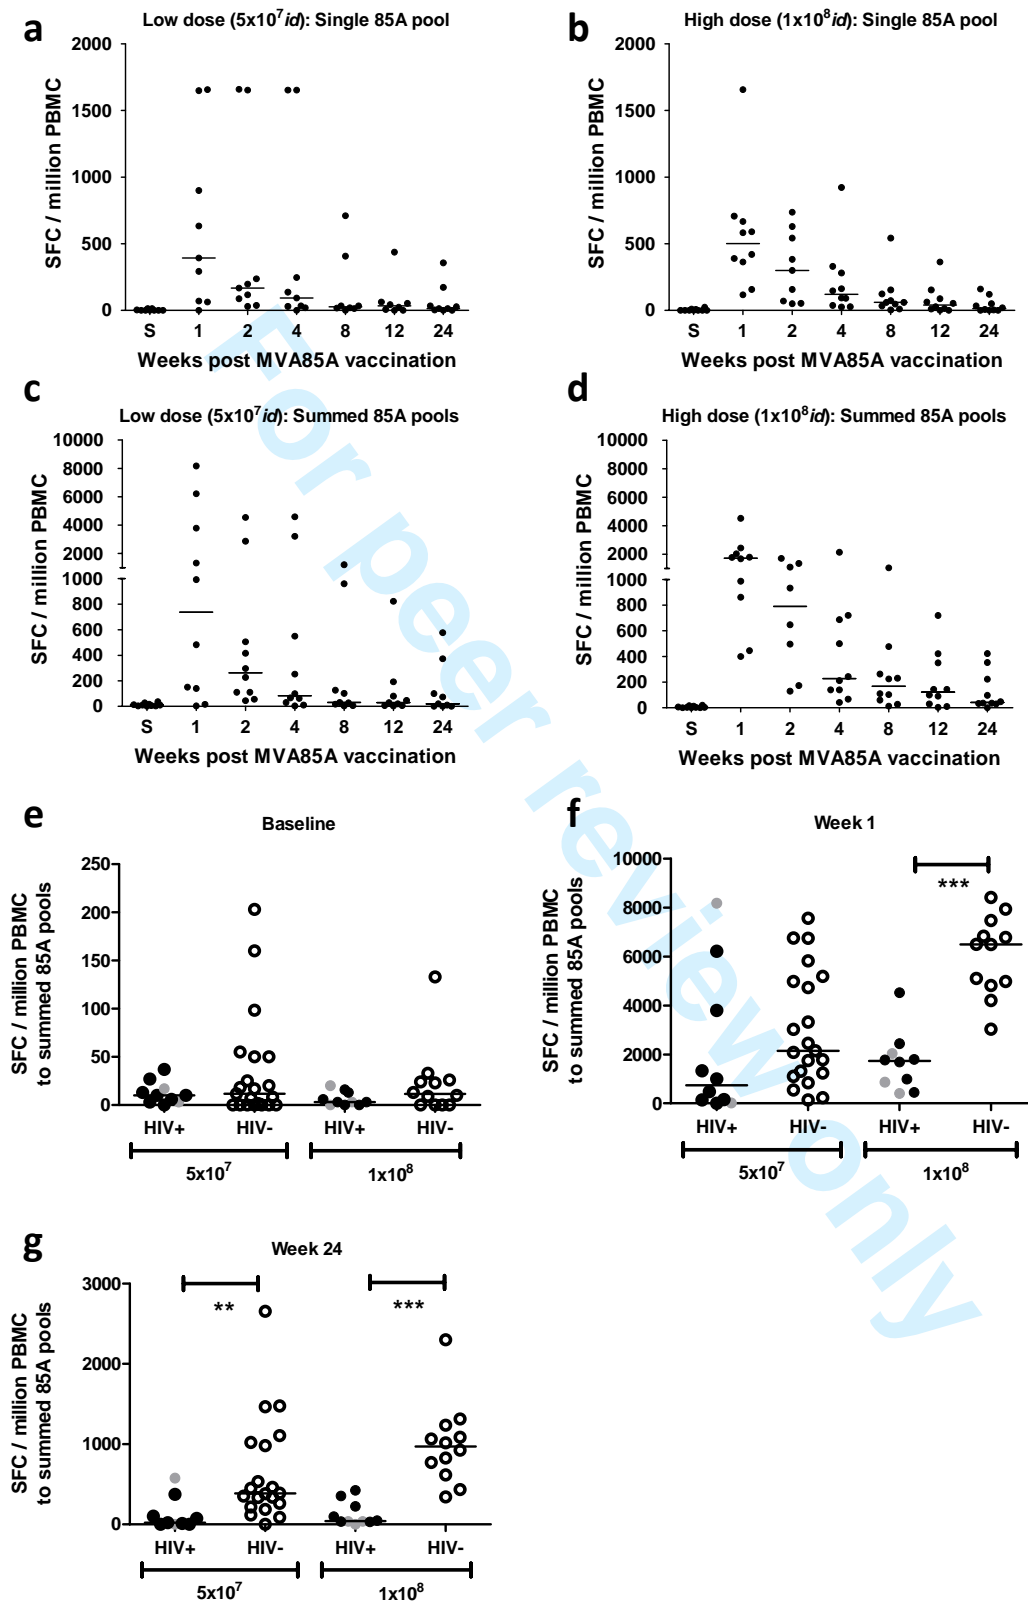

## Figure 4

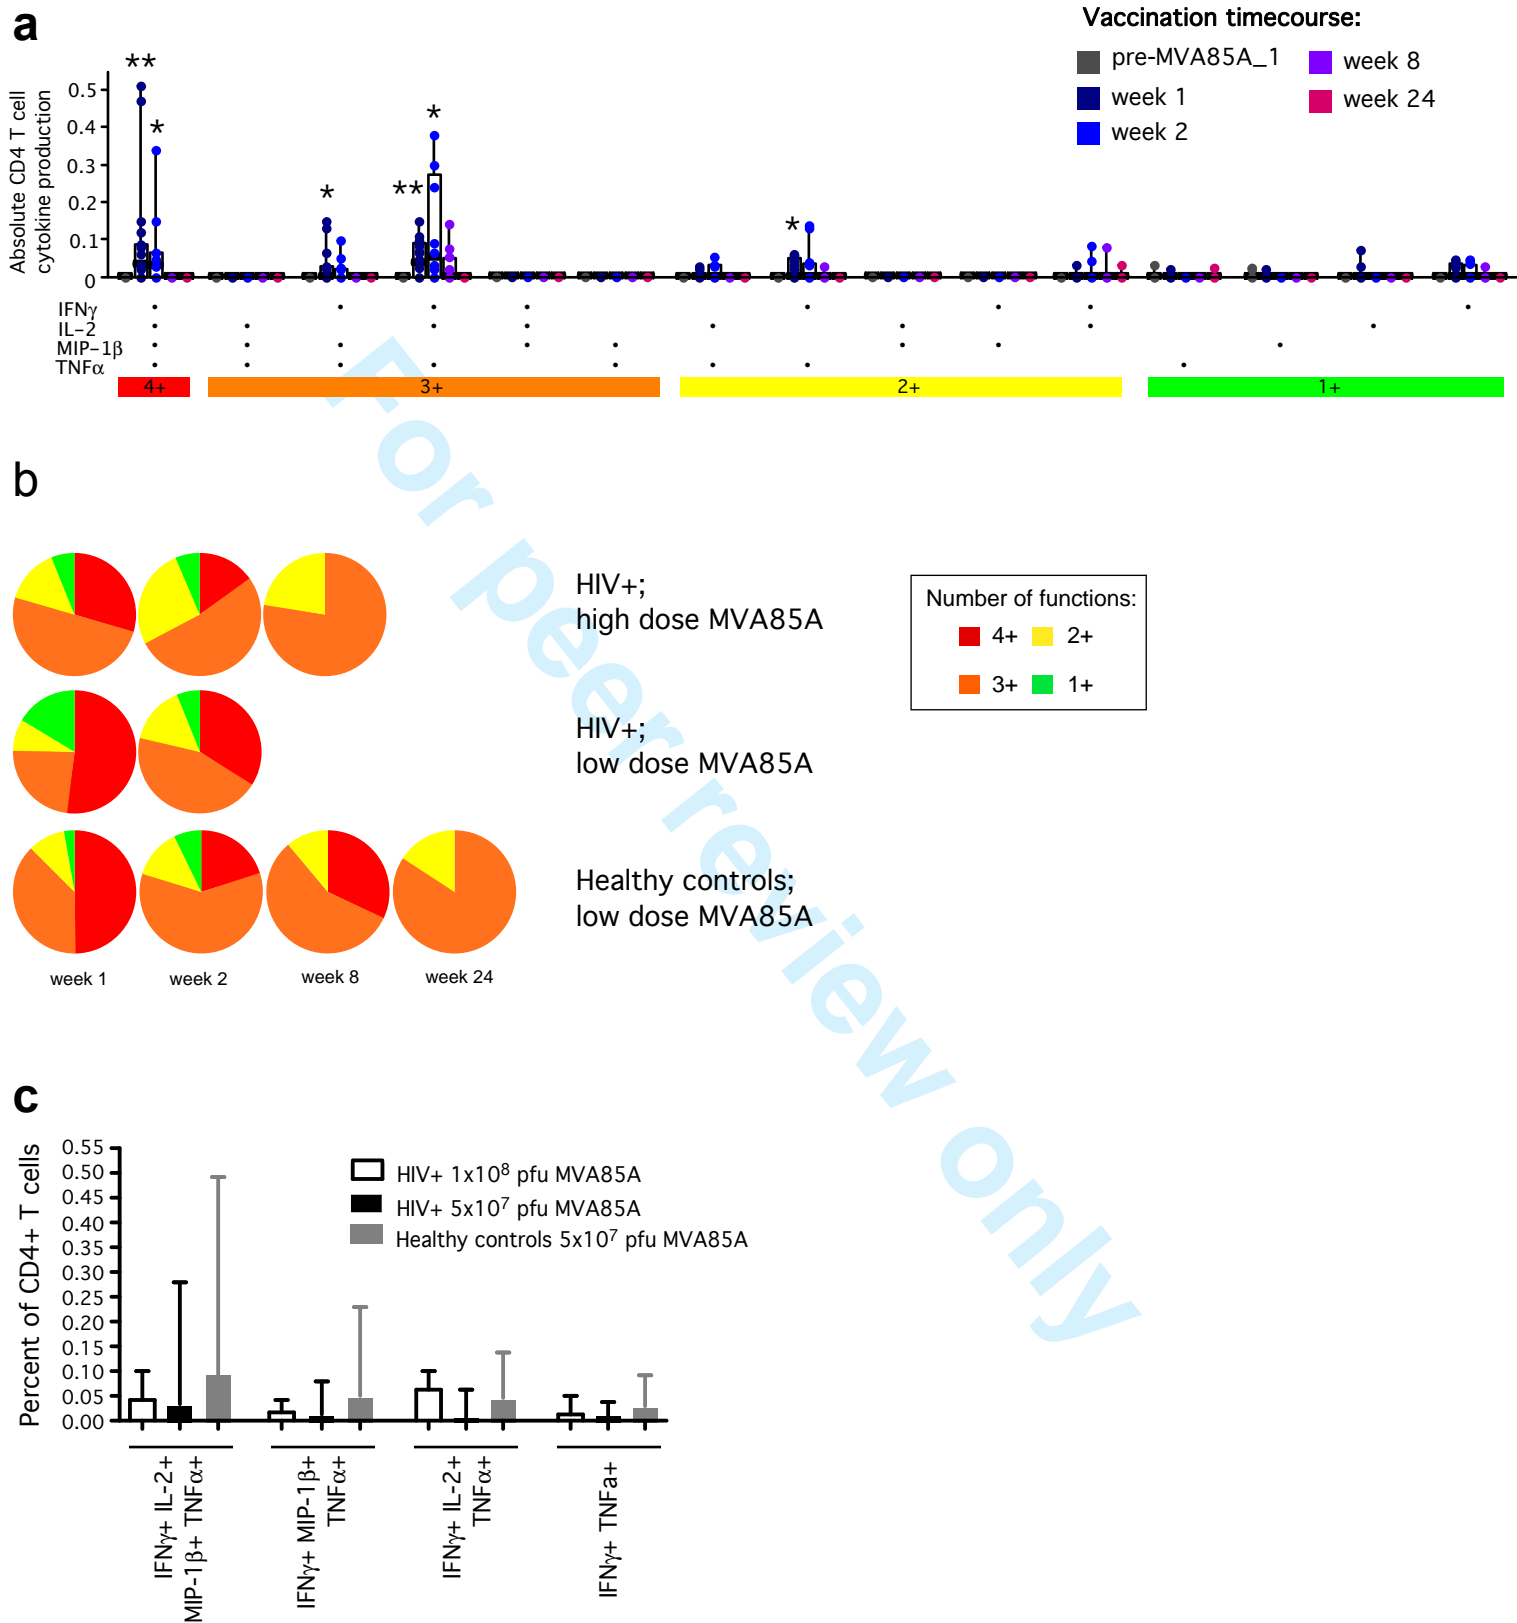

Figure 5

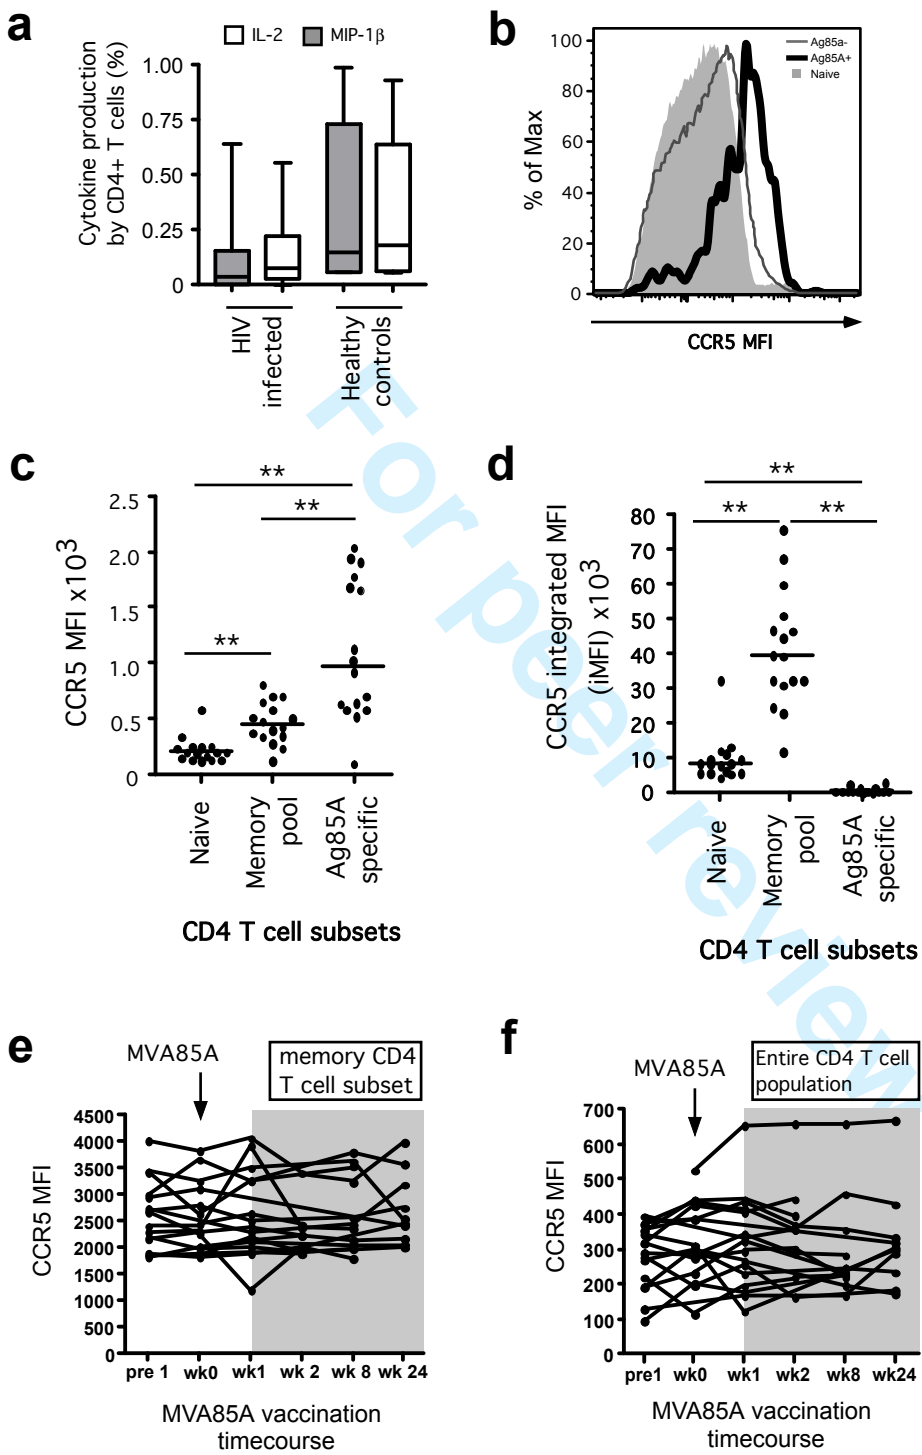

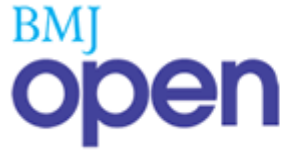

## A Phase I study evaluating the safety and immunogenicity of MVA85A, a candidate TB vaccine, in HIV-infected adults

|                                 |                                                                                                                                                                                                                                                                                                                                                                                                                                                                                                                                                                                                                                                                                                                                                                                                                                                                                                                                                                                                                                                                                                                                                                                                                                                                                                                                                                                                                                                                                                                                                                                                                                                                                                                                                                                                     |
|---------------------------------|-----------------------------------------------------------------------------------------------------------------------------------------------------------------------------------------------------------------------------------------------------------------------------------------------------------------------------------------------------------------------------------------------------------------------------------------------------------------------------------------------------------------------------------------------------------------------------------------------------------------------------------------------------------------------------------------------------------------------------------------------------------------------------------------------------------------------------------------------------------------------------------------------------------------------------------------------------------------------------------------------------------------------------------------------------------------------------------------------------------------------------------------------------------------------------------------------------------------------------------------------------------------------------------------------------------------------------------------------------------------------------------------------------------------------------------------------------------------------------------------------------------------------------------------------------------------------------------------------------------------------------------------------------------------------------------------------------------------------------------------------------------------------------------------------------|
| Journal:                        | <i>BMJ Open</i>                                                                                                                                                                                                                                                                                                                                                                                                                                                                                                                                                                                                                                                                                                                                                                                                                                                                                                                                                                                                                                                                                                                                                                                                                                                                                                                                                                                                                                                                                                                                                                                                                                                                                                                                                                                     |
| Manuscript ID:                  | bmjopen-2011-000223.R1                                                                                                                                                                                                                                                                                                                                                                                                                                                                                                                                                                                                                                                                                                                                                                                                                                                                                                                                                                                                                                                                                                                                                                                                                                                                                                                                                                                                                                                                                                                                                                                                                                                                                                                                                                              |
| Article Type:                   | Research                                                                                                                                                                                                                                                                                                                                                                                                                                                                                                                                                                                                                                                                                                                                                                                                                                                                                                                                                                                                                                                                                                                                                                                                                                                                                                                                                                                                                                                                                                                                                                                                                                                                                                                                                                                            |
| Date Submitted by the Author:   | 30-Aug-2011                                                                                                                                                                                                                                                                                                                                                                                                                                                                                                                                                                                                                                                                                                                                                                                                                                                                                                                                                                                                                                                                                                                                                                                                                                                                                                                                                                                                                                                                                                                                                                                                                                                                                                                                                                                         |
| Complete List of Authors:       | <p>Minassian, Angela; University of Oxford, The Jenner Institute<br/> Rowland, Rosalind; University of Oxford, The Jenner Institute<br/> Beveridge, Natalie; University of Oxford, The Jenner Institute<br/> Satti, Iman; University of Oxford, The Jenner Institute<br/> Harris, Stephanie; University of Oxford, The Jenner Institute<br/> Poyntz, Hazel; University of Oxford, The Jenner Institute<br/> Hamill, Matthew; University of Oxford, The Jenner Institute<br/> Griffiths, Kristin; University of Oxford, The Jenner Institute<br/> Sander, Clare; University of Oxford, The Jenner Institute<br/> Ambrozak, David; NIAID, Vaccine Research Center<br/> Price, David; Human Immunology Section, Vaccine Research Center, NIAID, National Institutes of Health<br/> Hill, Brenna; NIAID, Vaccine Research Center<br/> Casazza, Joseph; NIAID, Vaccine Research Center<br/> Douek, Daniel; NIAID, Vaccine Research Center<br/> Koup, Richard; NIAID, Vaccine Research Center<br/> Roederer, Mario; NIAID, Vaccine Research Center<br/> Winston, Alan; Imperial College Healthcare NHS Trust<br/> Ross, Jonathan; University Hospitals Birmingham NHS Foundation Trust<br/> Sherrard, Jackie; Oxford Radcliffe Hospitals NHS Trust, Genito-urinary Medicine Department, Churchill Hospital<br/> Rooney, Guy; Great Western Hospitals NHS Foundation Trust, Great Western Hospital<br/> Williams, Nicola; University of Oxford, Centre for Statistics in Medicine<br/> Lawrie, Alison; Oxford University, The Jenner Institute<br/> Pathan, Ansar; University of Oxford, The Jenner Institute<br/> Fletcher, Helen; Oxford University, The Jenner Institute<br/> Poulton, Ian; Oxford University, The Jenner Institute<br/> McShane, Helen; University of Oxford, The Jenner Institute</p> |
| <b>Primary Subject Heading</b>: | Infectious diseases                                                                                                                                                                                                                                                                                                                                                                                                                                                                                                                                                                                                                                                                                                                                                                                                                                                                                                                                                                                                                                                                                                                                                                                                                                                                                                                                                                                                                                                                                                                                                                                                                                                                                                                                                                                 |
| Keywords:                       | Tuberculosis < INFECTIOUS DISEASES, HIV & AIDS < INFECTIOUS DISEASES, IMMUNOLOGY                                                                                                                                                                                                                                                                                                                                                                                                                                                                                                                                                                                                                                                                                                                                                                                                                                                                                                                                                                                                                                                                                                                                                                                                                                                                                                                                                                                                                                                                                                                                                                                                                                                                                                                    |
|                                 |                                                                                                                                                                                                                                                                                                                                                                                                                                                                                                                                                                                                                                                                                                                                                                                                                                                                                                                                                                                                                                                                                                                                                                                                                                                                                                                                                                                                                                                                                                                                                                                                                                                                                                                                                                                                     |

1  
2  
3  
4  
5  
6  
7  
8  
9  
10  
11  
12  
13  
14  
15  
16  
17  
18  
19  
20  
21  
22  
23  
24  
25  
26  
27  
28  
29  
30  
31  
32  
33  
34  
35  
36  
37  
38  
39  
40  
41  
42  
43  
44  
45  
46  
47  
48  
49  
50  
51  
52  
53  
54  
55  
56  
57  
58  
59  
60

SCHOLARONE™  
Manuscripts

For peer review only

1  
2  
3  
4 **A Phase I study evaluating the safety and immunogenicity of**  
5  
6 **MVA85A, a candidate TB vaccine, in HIV-infected adults**  
7  
8  
9

10 Angela M Minassian<sup>1</sup>, Rosalind Rowland<sup>1</sup>, Natalie ER Beveridge<sup>1</sup>, Ian D Poulton<sup>1</sup>,  
11 Iman Satti<sup>1</sup>, Stephanie Harris<sup>1</sup>, Hazel Poyntz<sup>1</sup>, Matthew Hamill<sup>1</sup>, Kristin Griffiths<sup>1</sup>,  
12 Clare R Sander<sup>1</sup>, David R Ambrozak<sup>2</sup>, David A Price<sup>3, 4</sup>, Brenna J Hill<sup>3</sup>, Joseph P  
13 Casazza<sup>2</sup>, Daniel C Douek<sup>3</sup>, Richard A Koup<sup>2</sup>, Mario Roederer<sup>5</sup>, Alan Winston<sup>6</sup>,  
14 Jonathan Ross<sup>7</sup>, Jackie Sherrard<sup>8</sup>, Guy Rooney<sup>9</sup>, Nicola Williams<sup>10</sup>, Alison M  
15 Lawrie<sup>1</sup>, Helen A Fletcher<sup>1</sup>, Ansar A Pathan<sup>1\*</sup> and Helen McShane<sup>1</sup>  
16  
17  
18  
19  
20  
21  
22  
23  
24

25 <sup>1</sup> The Jenner Institute, Old Road Campus Research Building, Oxford University, Oxford, OX3 7DQ,  
26 UK  
27

28 <sup>2</sup> Immunology Laboratory, Vaccine Research Center, NIAID, National Institutes of Health, Bethesda,  
29 Maryland, USA  
30

31 <sup>3</sup> Human Immunology Section, Vaccine Research Center, NIAID, National Institutes of Health,  
32 Bethesda, Maryland, USA  
33

34 <sup>4</sup> Department of Infection, Immunity & Biochemistry, Cardiff University School of Medicine, Cardiff,  
35 Wales, UK  
36

37 <sup>5</sup> Immuno-Technology Section, Vaccine Research Center, NIAID, National Institutes of Health,  
38 Bethesda, Maryland, USA  
39

40 <sup>6</sup> Imperial College Healthcare NHS Trust, Praed Street, London, W2 1NY, UK  
41

42 <sup>7</sup> Selly Oak Hospital, Selly Oak, University Hospitals Birmingham NHS Foundation Trust, B29 6JD,  
43 UK  
44

45 <sup>8</sup> Genito-urinary Medicine Department, Churchill Hospital, Oxford Radcliffe Hospitals NHS Trust,  
46 Oxford, OX3 7LJ, UK  
47

48 <sup>9</sup> Great Western Hospital, Great Western Hospitals NHS Foundation Trust, Swindon, UK  
49

50 <sup>10</sup> Centre for Statistics in Medicine, Wolfson College Annexe, University of Oxford, Linton Road,  
51 Oxford OX2 6UD  
52  
53  
54



1  
2  
3  
4  
5  
6  
7  
8  
9  
10  
11  
12  
13  
14  
15  
16  
17  
18  
19  
20  
21  
22  
23  
24  
25  
26  
27  
28  
29  
30  
31  
32  
33  
34  
35  
36  
37  
38  
39  
40  
41  
42  
43  
44  
45  
46  
47  
48  
49  
50  
51  
52  
53  
54  
55  
56  
57  
58  
59  
60

\* Now at Centre for Infection, Immunity and Disease Mechanisms, Biosciences, School of Health Sciences and Social Care, Brunel University, Uxbridge UB8 3PH, West London, UK

Correspondence to Helen McShane, [helen.mcsbane@ndm.ox.ac.uk](mailto:helen.mcsbane@ndm.ox.ac.uk)

Short title: Phase I study with MVA85A in HIV

For peer review only

**ABSTRACT**

**OBJECTIVES:** Control of the TB epidemic is a global health priority and one that is only likely to be achieved through vaccination. The critical overlap with the HIV epidemic requires any effective TB vaccine regimen to be safe in individuals who are infected with HIV. The objectives of this clinical trial were to evaluate the safety and immunogenicity of a leading candidate TB vaccine, MVA85A, in healthy, HIV-infected adults.

**DESIGN:** This was an open-label Phase I trial, performed in 20 healthy HIV-infected, antiretroviral-naïve subjects. Two different doses of MVA85A were each evaluated as a single immunisation in 10 subjects, with 24 weeks of follow-up. Safety of MVA85A was assessed by clinical and laboratory markers, including regular CD4 counts and HIV RNA load measurements. Vaccine immunogenicity was assessed by *ex-vivo* IFN- $\gamma$  ELISpot assays and flow cytometric analysis.

**RESULTS:** MVA85A was safe in subjects with HIV infection, with an adverse event profile comparable to previous trials in HIV-uninfected subjects. There were no clinically significant vaccine-related changes in CD4 count or HIV RNA load in any subjects, and no evidence from qPCR analyses to indicate that MVA85A vaccination leads to widespread preferential infection of vaccine-induced CD4+ T cell populations. Both doses of MVA85A induced an antigen-specific IFN- $\gamma$  response that was durable for 24 weeks, although of a lesser magnitude compared to HIV-uninfected subjects. The functional quality of the vaccine-induced T cell response in HIV-infected subjects was remarkably comparable, although less durable, to that observed in healthy HIV-uninfected controls.

1  
2  
3 **CONCLUSION:** MVA85A is safe and immunogenic in healthy adults infected with  
4 HIV. Further safety and efficacy evaluation of this candidate vaccine in TB and HIV  
5 endemic areas is merited.

Deleted: therefore

## 10 **ARTICLE SUMMARY SECTION**

### 12 **Article focus**

- 14 • HIV infection increases susceptibility to TB, and globally, TB is the cause of  
15 death in up to half of AIDS deaths
- 16 • There is an urgent need for a safe and effective TB vaccine in HIV-infected  
17 people

### 22 **Key messages**

- 24 • MVA85A, a leading candidate TB vaccine, is safe and well tolerated in HIV-  
25 infected people and does not induce changes in either CD4 count or HIV RNA  
26 load
- 27 • MVA85A is immunogenic in HIV-infected people, and induces a similar  
28 immune profile to that seen in HIV-uninfected people, but the immunogenicity  
29 is less durable in HIV-infected people.

### 36 **Strengths and limitations of this study**

- 37 • This is a Phase I study with 20 subjects, and further studies are needed in TB  
38 endemic countries in this important target population.

43  
44  
45  
46  
47 **Funding:** This study was supported by The Wellcome Trust (Grant number  
48 WT076943MA), TBVAC (an EU 6<sup>th</sup> Framework programme grant) and The NIHR  
49 Oxford Biomedical Research Centre.  
50  
51

## INTRODUCTION

Tuberculosis (TB) and HIV are inextricably linked. At the end of 2007, approximately 33.2 million persons were living with Human Immune Deficiency Virus-1 (HIV) infection, an estimated one-third of whom were co-infected with *Mycobacterium tuberculosis* (*M. tuberculosis*)<sup>1</sup>. TB is the cause of death for up to half of all AIDS patients<sup>2</sup> and the increasing incidence of drug-resistant strains of *M. tuberculosis* poses a significant threat to a susceptible HIV-infected population<sup>3</sup>.

*Mycobacterium bovis* (*M. bovis*) Bacille Calmette Guérin (BCG) fails to protect consistently against the adult pulmonary form of TB, whilst providing reliable protection against disseminated infection in childhood<sup>4</sup>. An improved vaccine strategy is thus essential for global control of this disease<sup>5</sup>. MVA85A (modified vaccinia virus Ankara expressing antigen 85A) is a leading candidate TB vaccine, designed to enhance the effect of BCG; it is safe and highly immunogenic in healthy BCG-naïve and BCG-vaccinated subjects, and in subjects latently infected with *M. tuberculosis* in the UK and Africa<sup>6-11</sup>.

It is essential that any new TB vaccine is safe in an HIV-infected population. Subunit vaccines are an ideal choice for an immuno-compromised population in which the safety of replicating whole organism vaccines may be a concern. Although MVA is a live viral vaccine vector, it cannot replicate in human cells<sup>12, 13</sup>. There are now safety data from a number of clinical trials with recombinant MVAs in HIV-infected subjects, which demonstrate no sustained effect on either HIV load or CD4 count<sup>14-16</sup>. Most of these studies assessed immune-reconstituted HIV-infected individuals on anti-retroviral therapy (ARV); however, some ARV-naïve subjects with more advanced HIV infection have also been vaccinated with a recombinant MVA, with no

1  
2 significant rise in HIV load or fall in CD4 count over a 4-week follow-up period <sup>17</sup>.

3  
4 Preclinical studies in severely immuno-suppressed macaques have also documented  
5  
6 safety in this model <sup>18</sup>. To date, MVA85A has been administered to more than 1,000  
7  
8 individuals with no vaccine-related serious adverse events <sup>6, 8-11</sup> (McShane,  
9  
10 unpublished data).

11  
12 Here we present the first clinical trial of a subunit TB vaccine in an HIV-infected

13  
14 population. The primary endpoint was to evaluate the safety of two doses of

**Deleted:** This trial was designed to

15  
16 MVA85A in healthy HIV-infected subjects in the UK and the secondary endpoint was

17  
18 to evaluate the immunogenicity of this vaccine regimen.

**Deleted:** of two doses of MVA85A in  
healthy HIV-infected subjects in the UK

19  
20  
21  
22  
23  
24  
25  
26  
27  
28  
29  
30  
31  
32  
33  
34  
35  
36  
37  
38  
39  
40  
41  
42  
43  
44  
45  
46  
47  
48  
49  
50  
51 **METHODS**  
52  
53  
54  
55  
56  
57  
58  
59  
60

### Trial design and participants

The protocol for this multi-site study was approved by the Medicines and Healthcare products Regulatory Agency (MHRA) and [ethical approval was obtained from](#) the Gene Therapy Advisory Committee (GTAC). Participants were recruited from the Genitourinary Medicine (GUM) departments at the Oxford Radcliffe Hospitals NHS Trust, University Hospitals Birmingham NHS Foundation Trust (Selly Oak Hospital), Great Western Hospitals NHS Foundation Trust, and Imperial College Healthcare NHS Trust, London.

Potentially eligible subjects were referred to the clinical trial team. Vaccination visits took place in Oxford; screening and follow-up visits took place at local NHS Trust sites. Written informed consent was obtained from all subjects prior to enrolment in the trial, and the referring HIV physicians were notified.

Eligibility required participants to be generally healthy, aged 18-55 years, with a normal chest radiograph and no clinical or radiological evidence of TB disease, a current CD4 count (measured at screening) of at least  $350 \times 10^6/L$ , a nadir CD4 count of not less than  $300 \times 10^6/L$  and an HIV RNA load at screening of less than 100,000 copies/mL. All subjects were diagnosed with HIV infection at least six months before screening and had not received any ARVs within the preceding six months (full inclusion/exclusion criteria, Supplemental Methods). In all cases, testing for latent *M. tuberculosis* infection (LTBI) was conducted at screening using an in-house *ex-vivo* interferon gamma (IFN- $\gamma$ ) ELISpot assay for ESAT6 and CFP10 peptides. Subjects found to be latently infected were referred back to their consultants for possible treatment at the end of the trial.

The trial was registered on a clinical trials database: ClinicalTrials.gov ID NCT00395720.

## Vaccine

Clinical grade MVA was produced under Good Manufacturing Practice standard by IDT Biologika GmbH.

## Procedures

Participants were vaccinated intradermally with either  $5 \times 10^7$  plaque-forming units (pfu; first group of 10 subjects) or  $1 \times 10^8$  pfu (second group of 10 subjects). Subjects were sequentially allocated first to the low dose group and then once safety had been demonstrated, to the high dose group. A diary card was completed by all subjects recording local and systemic adverse events and body temperature for days 1 to 7 post-vaccination. All subjects were followed up regularly for 12 months; blood samples taken at each time-point for CD4 count, HIV RNA load measurement and cellular immunological assays. CD4 count and HIV RNA load results were communicated to the patient's HIV physician at regular intervals. Routine haematology and biochemistry assays were performed at weeks 1 and 12 after vaccination. All subjects attended their usual NHS follow-up appointments and received routine clinical care throughout the trial.

## Immunological assays

*Ex vivo* IFN- $\gamma$  ELISpot assays were performed at screening and at weeks 1, 2, 4, 12, and 24 post-vaccination using fresh peripheral blood mononuclear cells (PBMCs), as described previously<sup>10</sup>. A single pool of 15-mer peptides spanning the Ag85A protein (66, overlapping by 10 amino acids, 2 $\mu$ g/mL final concentration of each peptide in each well), and 7 pools of non-overlapping 9-10 Ag85A peptides (final concentration of 10 $\mu$ g/mL in each well) were used to stimulate for the IFN- $\gamma$  ELISpot assays. For the 7 peptide pool wells, the results were summed across all peptide pools for each

1  
2  
3  
4  
5  
6  
7  
8  
9  
10  
11  
12  
13  
14  
15  
16  
17  
18  
19  
20  
21  
22  
23  
24  
25  
26  
27  
28  
29  
30  
31  
32  
33  
34  
35  
36  
37  
38  
39  
40  
41  
42  
43  
44  
45  
46  
47  
48  
49  
50  
51  
52  
53  
54  
55  
56  
57  
58  
59  
60

time-point. This potentially resulted in duplicate counting of T cells that responded to any of the 10mer overlap regions, since any 10mer occurred in two pools with adjacent peptides, but allows direct comparison with immunogenicity data from previous trials.

Intracellular cytokine staining of PBMCs was performed as described previously<sup>19</sup>. Briefly, cells were stained with the amine reactive LIVE/DEAD fixable dye ViViD (Molecular Probes, Invitrogen) and then surface stained with monoclonal antibodies against CD4, CD14, CD19, CD27, CD45RO, CD57 and CCR5. After washing, cells were permeabilized (Cytotfix/cytoperm kit; BD Pharmingen) and stained intracellularly for CD3, CD8, IFN- $\gamma$ , TNF- $\alpha$ , IL-2 and MIP-1 $\beta$ . Naïve CD4<sup>+</sup> memory cells were identified as CD45RO-CD27+CD57+; memory CD4 T cell as CD45RO+CD27 $\pm$ CD57 $\pm$ . CD4<sup>+</sup> T cells producing two or more cytokines (IFN- $\gamma$ , IL-2 or TNF- $\alpha$ ) following stimulation with Ag85A peptides were sorted to greater than 98% purity using a modified FACS Aria flow cytometer (BD Biosciences); CMV-specific CD4<sup>+</sup> T cells, defined similarly, and bulk resting memory CD4<sup>+</sup> T cells were sorted simultaneously. Cytokine production and the expression of surface markers were analysed using FlowJo version 8.7 (Tree Star Inc), Pestle version 1.5 and SPICE version 4.1 (both from Mario Roederer, Vaccine Research Center, NIAID, NIH, USA).

Real-time quantitative PCR (qPCR) was used to determine the proportion of HIV-infected Ag85A-specific CD4<sup>+</sup> T cells; resting memory CD4<sup>+</sup> T cells (non-Ag85A-specific) and CMV-specific CD4<sup>+</sup> T cells were used as intra-individual controls. HIV-1 gag proviral DNA within sorted CD4<sup>+</sup> T cell populations was quantified by qPCR, as described previously<sup>20</sup>. qPCR was performed simultaneously for albumin



1  
2 gene copy number in all sorted CD4+ T cell populations to quantify cell number in  
3 each reaction.  
4

5  
6 CD4+ T cells from 12 subjects (4/10 in the low-dose group and 8/10 in the high-dose  
7 group) were analysed for HIV *gag* content; low sort yields (less than 250 antigen-  
8 specific CD4+T cells) prevented similar analyses in the remaining 8 subjects.  
9

10 Serum levels of MIP-1 $\alpha$ , MIP-1 $\beta$ , RANTES, TNF- $\alpha$  and IL-2 were measured pre-  
11 vaccination and at weeks one, two and 24 post-vaccination using FlowCytomix  
12 simplex kits (Bender MedSystems). Serum was thawed and plated out in duplicate in  
13 round-bottom 96-well plates. Samples were used neat for MIP-1 $\alpha$ , MIP-1 $\beta$ , TNF- $\alpha$   
14 and IL-2, and diluted 1/10 for RANTES. Standards (provided) were reconstituted as  
15 specified, and 1/3 serial dilutions plated in duplicate. Bead and biotin-conjugate  
16 cocktails were added to each well in 25 $\mu$ L and 50 $\mu$ L volumes, respectively, and  
17 incubated for two hours in the dark at room temperature. Samples were then washed  
18 twice in 100 $\mu$ L Assay Buffer. Streptavidin-PE (50 $\mu$ L) and Assay Buffer (100 $\mu$ L) were  
19 added and plates were incubated for one hour in the dark at room temperature.  
20 Samples were then washed again and transferred to cluster tubes in 4%  
21 paraformaldehyde in PBS (400 $\mu$ L) and acquired using an LSRII flow cytometer (BD  
22 Biosciences) set up with the beads provided and the highest concentration standard;  
23 the stopping gate was set so that at least 300 events were collected for each sample.  
24 Data were analysed using FlowCytomixPro software (Bender MedSystems).  
25  
26  
27  
28  
29  
30  
31  
32  
33  
34  
35  
36  
37  
38  
39  
40  
41  
42  
43  
44

#### 45 **Statistical analysis**

46 Continuous outcomes were presented as a median (range) for each group. Median  
47 difference was calculated to assess difference between two groups and the  
48 corresponding 95% confidence interval was computed using the robust method  
49  
50  
51  
52  
53  
54

1  
2  
3  
4  
5  
6  
7  
8  
9  
10  
11  
12  
13  
14  
15  
16  
17  
18  
19  
20  
21  
22  
23  
24  
25  
26  
27  
28  
29  
30  
31  
32  
33  
34  
35  
36  
37  
38  
39  
40  
41  
42  
43  
44  
45  
46  
47  
48  
49  
50  
51  
52  
53  
54  
55  
56  
57  
58  
59  
60

proposed by Newson<sup>21</sup>. The overall magnitude of vaccine-induced CD4+ T cell responses over the 24 weeks was summarised using area under the curve (AUC) for each dose group. Peak (1 week) and plateau (24 weeks) CD4+ T cell responses were compared with those at baseline (pre-vaccination) using the Wilcoxon signed rank test, Stata Statistical Software, Release 9.0. 2005 (Stata Corporation, College Station, TX). Mann-Whitney U test was used to compare between the vaccine groups. Comparisons between specific time points in this trial and previously published trials of MVA85A<sup>6, 22</sup>, and between low and high dose groups were conducted using the Mann-Whitney U test (Stata). Non-parametric Spearman rank analyses were used to correlate immune assays and CD4/HIV RNA load with CD4+ T cell responses.

**Deleted:** Area under the curve (AUC) analysis was performed to compare the magnitude of vaccine-induced CD4+ T cell responses in each dose group (groups compared using the Mann-Whitney U test).

**Deleted:** Within-subject CD4 counts and HIV RNA load levels at weeks 1 and 24 post-vaccination were compared with baseline pre-vaccination levels, using a repeated measures analysis of variance (*p*-values obtained from the F-test, Stata). ¶

## RESULTS

Thirty-five individuals attended for screening between October 2006 and June 2009; 20 subjects were enrolled (Fig. 1, [CONSORT](#)). The demographics of the 20 participants are shown in Table 1, and were comparable across the two groups.

Deleted: consort

### Safety of MVA85A in HIV-infected subjects

Local reactions related to the MVA vaccine occur during the first week after vaccination and have been reported previously<sup>6, 7, 10</sup>. The local adverse event (AE) profile recorded in the diary cards of the HIV-infected subjects in this study was comparable to that observed in HIV-uninfected subjects, although pruritis appeared slightly higher in the HIV-infected group (Table 2a). There were no severe local reactions and most local AEs were mild.

One subject in the low dose group experienced a single episode of fever greater than 37.5 °C (documented at 38.1°C). All other subjective systemic symptoms occurred with similar frequencies in the low dose and high dose groups (Table 2b). There was one moderate systemic AE and all others were mild.

Pre-vaccination CD4 counts and HIV RNA loads for all 20 subjects over a time period of one to six years before enrolment are shown in Figure 2. These longitudinal data illustrate the levels of natural fluctuation that occur over time and represent important baseline measurements for the interpretation of these parameters post-vaccination, also shown in Figure 2, in the absence of an unvaccinated control group.

No clinically significant changes in CD4 counts or HIV RNA load was seen post-vaccination.

Deleted: A repeated measures analysis of variance showed no evidence of a difference in either CD4 counts or HIV RNA load levels pre- and post-vaccination (low dose, CD4 count:  $p=0.35$ ; low dose, HIV RNA load:  $p=0.30$ ; high dose, CD4 count:  $p=0.83$ ; high dose, HIV RNA load:  $p=0.48$ ).

1  
2  
3  
4  
5  
6  
7  
8  
9  
10  
11  
12  
13  
14  
15  
16  
17  
18  
19  
20  
21  
22  
23  
24  
25  
26  
27  
28  
29  
30  
31  
32  
33  
34  
35  
36  
37  
38  
39  
40  
41  
42  
43  
44  
45  
46  
47  
48  
49  
50  
51  
52  
53  
54  
55  
56  
57  
58  
59  
60

A major concern with respect to the vaccination of HIV-infected individuals is the possibility that responding antigen-specific CD4+ T cells will act as preferential targets for HIV infection as a function of their activated status, thereby enhancing the propagation of HIV and accelerating disease progression. In this study, however, there was no evidence for preferential HIV infection of Ag85A-specific CD4+ T cells. The median number of CD4+ T cells in Ag85A-specific qPCR reactions was 73 (95% CI: 15-130 CD4+ T cells). Where possible, multiple time-points throughout the vaccination course for each subject were analyzed, to determine the proportion of Ag85A-specific CD4+ T cells that were infected with HIV. Of 29 Ag85A-specific CD4+ T cell samples in total (11 subjects), only one subject showed a positive signal for HIV *gag* DNA by qPCR at two different post-vaccination timepoints (weeks 2 and 8 post-vaccination; data not shown). In the 11 subjects tested, resting HIV-specific and CMV-specific memory cell populations showed a positive signal in all assays (data not shown). In addition, vaccination had no effect on levels of MIP-1 $\alpha$ , MIP-1 $\beta$ , RANTES, TNF- $\alpha$  and IL-2 in unstimulated serum (data not shown).

### Immunogenicity of MVA85A in HIV-infected subjects

MVA85A induced significant antigen-specific T cell responses as measured by IFN- $\gamma$  ELISpot assay (Fig. 3a-d, Table 3a). In the low dose group, the frequency of IFN- $\gamma$ -secreting T cells responding to the single 85A peptide pool at week one post-vaccination, increased by a median of 393 sfc/million compared to baseline ( $p=0.009$ ); there a significant increase remained until 24 weeks post-vaccination ( $p=0.032$ ). In the high dose group, a median increase of 502 sfc/million was apparent at week 1 post-vaccination ( $p=0.005$ ); again, this response was maintained until 24 weeks ( $p=0.048$ ). In both groups, T cell responses to the summed 85A peptide pools followed a similar pattern with a significant increase above baseline at week 1 (738

Deleted: 32

Deleted: 2

Deleted: three samples from

Deleted: two

Deleted: s

Deleted: : 1 subject

Deleted: 1004 (

Deleted: at week 1 post-vaccination

Deleted: )

Deleted: and

Deleted: subject 1029

Deleted: 1 subject at

Deleted:

Deleted: (

Deleted: )

Deleted: (

Deleted:

Deleted: a

Deleted: ll

Deleted: 2

Deleted: For CMV-specific CD4+ T cell populations, HIV *gag* DNA was detected in 3 subjects 1004, 1029 and 1035 at the pre-vaccination time-points only (data not shown). All other samples were negative.

Formatted: Font: Bold

Formatted: Font: Bold

1  
2 and 1730 sfc/million for low and high dose groups, respectively), although, the week  
3  
4 24 response was only maintained significantly above baseline in the high dose group  
5  
6 (low dose  $p=0.17$ ; high dose  $p=0.007$ ). There were no significant differences in the  
7  
8 overall magnitude (i.e. AUC) of the IFN- $\gamma$  response between low and high dose  
9  
10 groups across the follow-up period ( $p=0.29$  and  $p=0.68$  for summed and single  
11  
12 peptide pools, respectively; data not shown). However the responder rate was higher  
13  
14 in the high dose group with no observed non-responders (ie those subjects with no  
15  
16 measurable vaccine induced immune response) compared with 1-2 non-responders  
17  
18 (depending on antigen) in the low dose group. Overall, the kinetics of the Ag85A-  
19  
20 specific T cell responses were very similar to those previously reported in similar  
21  
22 studies of HIV-uninfected subjects<sup>6-11</sup>.

23  
24 Ag85A-specific T cell responses in the low-dose group were significantly lower  
25  
26 compared to those observed in previously published studies of HIV-uninfected  
27  
28 subjects (AUC analysis,  $p=0.02$ ; Table 3b)<sup>6, 22</sup>. This difference was not significant at  
29  
30 week 1 (MWU analysis,  $p=0.12$ ), which represents the peak response, but was  
31  
32 significant at week 24 post-vaccination (MWU analysis,  $p=0.004$ ; Table 3b, Figure  
33  
34 3e-g). There were no significant differences in baseline (pre-vaccination) responses  
35  
36 between the HIV-infected and HIV-uninfected groups (MWU analysis,  $p=0.85$ ;  
37  
38 Figure 3e). Similarly, HIV-infected subjects in the high dose group exhibited  
39  
40 significantly lower responses compared to HIV-uninfected subjects who received the  
41  
42 same dose of MVA85A (AUC analysis,  $p=0.0001$ ; week 1 and week 24 MWU  
43  
44 analysis,  $p = 0.0001$ ; Table 3b, Figure 3e-g). Again, baseline responses were  
45  
46 comparable ( $p=0.24$ ) (Fig. 3e).

47  
48 There was no significant correlation between the CD4 count at screening and the peak  
49  
50 summed 85A peptide pool response ( $R=0.04$ ,  $p=0.09$ ), nor between HIV RNA load at  
51  
52

Deleted: at any time-point

Deleted: AUC analysis,

Deleted: Table 3b

Deleted: a weak positive

Deleted: and a weak negative correlation

1  
2 screening and the peak immune response ( $R = -0.04$ ,  $p = 0.08$ ). There was a strong  
3  
4 negative correlation between viral load at screening and the plateau immune response  
5  
6 at week 24 ( $R = -0.8$ ,  $p = 0.002$ ).  
7

8  
9 Four subjects were found to have LTBI. However, there were no significant post-  
10  
11 vaccination changes in the magnitude of ESAT-6/CFP10 responses in these subjects  
12  
13 (data not shown).

14  
15 Ag85A-specific cytokine/chemokine production by CD4+ T cells prior to MVA85A  
16  
17 vaccination was undetectable and increased significantly post-vaccination (Fig. 4a).  
18  
19 One week following MVA85A vaccination, more than 40% of Ag85A-specific CD4+  
20  
21 T cells produced IFN- $\gamma$ , IL-2, MIP-1 $\beta$  and TNF- $\alpha$  simultaneously ( $p < 0.01$ ); this  
22  
23 remained significant at week 2 ( $p < 0.05$ ). By week 8 post-vaccination, 60% of Ag85A-  
24  
25 specific CD4+ T cells were still producing IFN- $\gamma$ , IL-2 and TNF- $\alpha$  simultaneously;  
26  
27 production of IL-2 and IFN- $\gamma$  was maintained until 24 weeks. Production of MIP-1 $\beta$   
28  
29 was not detected beyond week 2 post-vaccination (Fig. 4a, 5a). In the first two weeks  
30  
31 post-vaccination, Ag85A-specific CD4+ T cells exhibited similar functional profiles  
32  
33 in the HIV-infected groups, both low dose and high dose, and the "control" low dose  
34  
35 HIV-uninfected group; in all cases, the responses were dominated by four functionally  
36  
37 distinct subsets (Fig. 4b, c). IFN- $\gamma$  production measured by ICS correlated closely  
38  
39 with IFN- $\gamma$  secretion observed in the ELISpot assay ( $R = 0.75$ ,  $p < 0.0001$ ,  $n = 45$ ; data  
40  
41 not shown).  
42

43  
44 Surface expression of the HIV M-tropic co-receptor CCR5 was monitored throughout  
45  
46 the course of vaccination (Fig. 5). At week 1 post-vaccination, the MFI for CCR5 was  
47  
48 highest in the activated Ag85A-specific CD4+ T cells, and lowest in the naïve CD4+  
49  
50 T cell subsets. Using the integrated MFI (iMFI) function [calculated using both MFI](#)  
51  
52 [and cell frequencies](#), expression of CCR5 was highest in the [much larger](#) memory  
53  
54

Deleted: to account for

1  
2 CD4+ T cell pool (Fig. 5d). No significant increase in CCR5 expression was detected  
3  
4 in either the memory (Fig. 5e) or the total (Fig. 5f) CD4+ T cell populations as a  
5  
6 result of MVA85A vaccination.  
7  
8  
9  
10  
11  
12  
13  
14  
15  
16  
17  
18  
19  
20  
21  
22  
23  
24  
25  
26  
27  
28  
29  
30  
31  
32  
33  
34  
35  
36  
37  
38  
39  
40  
41  
42  
43  
44  
45  
46  
47  
48  
49  
50  
51  
52  
53  
54  
55  
56  
57  
58  
59  
60

For peer review only

## DISCUSSION

This is the first Phase I trial of a subunit vectored TB vaccine in HIV-infected individuals. Similar studies in South Africa (*Scriba et al, submitted*) and Senegal (*Mboup et al, unpublished data*) are ongoing. The two main findings of this study are that MVA85A is safe in healthy subjects infected with HIV (a proportion of whom are co-infected with *M. tuberculosis*), and that MVA85A is immunogenic in this population, albeit at a lower level than in HIV-uninfected subjects.

Deleted: Tameris et al, unpublished data

The local and systemic AE profiles in this trial were comparable to those observed in HIV-uninfected subjects previously. Whilst we have not evaluated the safety of this vaccine in HIV-infected subjects with lower CD4 counts, we would not expect the safety profile of this vaccine to be altered by progression of HIV disease.

Deleted: statistically

Importantly, there were no clinically significant effects of vaccination on either CD4 count or HIV RNA load. It is important to understand the variability in these parameters during stable untreated HIV infection, to enable meaningful interpretation of fluctuations throughout the trial period. A recent quantitative review of cohort studies of HIV-infected adults suggests that, during stable untreated infection, intra-individual HIV RNA measurements can fluctuate over short periods of time by as much as 0.2-0.5 log<sub>10</sub> copies/mL, with measurement error and physiological fluctuation each contributing about 50% of this variation. CD4 counts can also vary within patients by 60-130 cells/uL within weeks, but there is less measurement error, and during stable infection the overall within-subject variation is proportionally larger for HIV RNA than for CD4 count<sup>23</sup>. In this study, we also observed greater intra-individual variations in HIV RNA load compared to CD4 counts. Only one subject in each group demonstrated a more than



1  
2 0.5 log rise in HIV RNA load at week 24 post-vaccination. The first of these (low  
3 dose group, 008) had displayed a relatively high baseline HIV RNA load and low  
4 baseline CD4 count at screening, just within the inclusion criteria. As the rise in HIV  
5 RNA load was only detectable 24 weeks after vaccination, it was considered highly  
6 unlikely that this was due to MVA85A vaccination. This subject commenced ARVs  
7 before week 24; all other subjects remained ARV-free throughout the trial period. The  
8 second subject (high dose group, 035) developed a rise in HIV RNA load between  
9 week 12 and week 24, peaking at just greater than a 0.5 log increase over baseline.  
10 However, this subject's HIV RNA load had been stable prior to this, so it was again  
11 deemed unlikely that this was a vaccination-related effect. Other fluctuations in the  
12 HIV RNA loads were observed, but any sustained rise was well within the expected  
13 0.5 log variation.  
14

15 HIV preferentially infects memory CD4+ T cells<sup>24, 25</sup>, in particular HIV-specific  
16 memory CD4+ T cells,<sup>20</sup> and other activated antigen-specific CD4+ T cells<sup>26</sup>. Using  
17 a sensitive qPCR method, we detected HIV *gag* DNA in Ag85A-specific CD4+ T  
18 cells from only 1/11 subjects post-vaccination (3 low dose and 8 high dose). This  
19 subject received high-dose MVA85A vaccination. This low positivity rate concurs  
20 with the stable CD4 count and HIV RNA load parameters in most subjects throughout  
21 the trial. Although the qPCR assay is sensitive, the low yield of Ag85A-specific  
22 CD4+ T cells entering the assay is an important limitation and provides just a  
23 snapshot of the HIV burden within the Ag85A-specific CD4+ T cell pool and  
24 warrants further future investigation. However, whilst small effects of MVA85A on  
25 HIV infection of CD4+ target cells cannot be excluded given the small sample size,  
26 these data suggest that MVA85A vaccination of healthy HIV-infected individuals  
27 does not lead to widespread preferential infection and depletion of vaccine-induced  
28  
29  
30  
31  
32  
33  
34  
35  
36  
37  
38  
39  
40  
41  
42  
43  
44  
45  
46  
47  
48  
49  
50  
51  
52  
53  
54  
55  
56  
57  
58  
59  
60

Deleted: 2

Deleted: 2

Deleted:

1  
2  
3  
4  
5  
6  
7  
8  
9  
10  
11  
12  
13  
14  
15  
16  
17  
18  
19  
20  
21  
22  
23  
24  
25  
26  
27  
28  
29  
30  
31  
32  
33  
34  
35  
36  
37  
38  
39  
40  
41  
42  
43  
44  
45  
46  
47  
48  
49  
50  
51  
52  
53  
54  
55  
56  
57  
58  
59  
60

CD4+ T cell populations in the periphery. [These data are supported by no change in surface expression of the HIV co-receptor CCR5 following MVA85A vaccination.](#) In addition, the lack of effect of vaccination on chemokine and cytokine levels in unstimulated serum supports the interpretation that vaccination with MVA85A did not lead to widespread immune activation in this subject group.

We have shown that vaccine-induced immunogenicity, while of moderate magnitude, is significantly lower than in healthy HIV-uninfected subjects given the same dose of MVA85A. Thus, additional strategies may be required to augment immune responses to MVA85A vaccination in the context of HIV infection. Partial reconstitution of the immune system with ARVs may improve the response to vaccination. Indeed, this study shows that the baseline HIV RNA level is a strong negative predictor of summed 85A peptide pool responses at week 24 post-vaccination. In addition, a booster vaccination with MVA85A may be required to enhance the vaccine-induced immune response.

The functional profile of Ag85A-specific CD4+ T cells observed in this study was remarkably comparable to that of healthy HIV-uninfected subjects<sup>19</sup> and *M. tuberculosis*-infected subjects<sup>10</sup>, although the response in HIV-infected subjects is less durable. IFN- $\gamma$  and TNF- $\alpha$  are known to be important for protective immunity to TB, and these cytokines dominated the MVA85A vaccine-induced CD4+ T cell response elicited in the current study cohort. In this study, production of MIP-1 $\beta$  by Ag85A-specific CD4+ T cells was not detectable after week 2 post-vaccination. The production of multiple cytokines including IL-2 and MIP-1 $\beta$  by HIV-specific CD8+ T cells is associated with long-term non-progression, albeit with uncertain causality<sup>27</sup>.

1  
2 The production of  $\beta$ -chemokines by CD8+ T cells was not assessed here as there were  
3  
4 no detectable Ag-85A specific CD8+ T cell responses pre- or post-vaccination.  
5  
6

7  
8 Vaccine-induced bystander activation of CD4+ T cells in HIV-infected subjects is  
9  
10 likely to be undesirable because activated CD4+ T cells are at increased risk of HIV  
11  
12 infection. The overall pattern of cytokine production and the frequency of CMV-  
13  
14 specific CD4+ T cell producing cytokines remained both relatively stable over the 24-  
15  
16 week period following MVA85A vaccination, and comparable to pre-vaccination  
17  
18 responses (Supplemental Figure 1). These data suggest that MVA85A vaccination  
19  
20 does not induce substantial bystander activation of antigen-specific CD4+ T cell  
21  
22 populations.  
23  
24

25  
26 Demonstrating the safety and immunogenicity of a new TB vaccine in an important  
27  
28 target population is a crucial step, but does not mean that the vaccine will be effective.  
29  
30 However, the data presented here support further safety and immunogenicity studies  
31  
32 of this candidate vaccine, together with proof-of-concept efficacy trials, in TB and  
33  
34 HIV endemic areas.  
35  
36  
37  
38  
39  
40  
41  
42  
43  
44  
45  
46  
47  
48  
49  
50  
51  
52  
53  
54

**Authors' Contributions:****Authors' Contributions:**

Concept and design of study, and obtaining funding: HMcS.

Protocol writing: HMcS, CRS, AMM, AML.

Recruitment, vaccination and follow-up of volunteers: AMM, RR, IDP, MH, AW, JR, JS, GR.

Immunology assays and analysis: AAP, NERB, IS, SH, HAF, HP.

Collaboration and contribution of reagents/materials/analysis tools: DRA, DAP, JPC, DCD, RAK, MR.

Data analysis: AMM, RR, AAP, NA, NERB, HMcS.

Writing of the paper: AMM, HMcS, with contributions from all authors.

**Conflict of Interest Statement:** AAP and HMcS are named inventors on a composition of matter patent for MVA85A owned by the University of Oxford, and are shareholders in a Joint Venture formed for the further development of this vaccine.

**Acknowledgements:**

We thank Dr Janet Scott and the clinical research nurses in Oxford, at St. Mary's Hospital in London and at Selly Oak Hospital in Birmingham, especially Kenneth Legg and Jan Harding, for their invaluable assistance in identification, recruitment and follow-up of eligible subjects. We also thank Professor Adrian Hill for discussions. Oxford University was the sponsor for this clinical trial. HMcS is a Wellcome Trust Senior Clinical Research Fellow and a Jenner Institute Investigator. DAP is a Medical Research Council Senior Clinical Fellow.

## REFERENCES

1. Dye C, Lonnroth K, Jaramillo E, Williams BG, Raviglione M. Trends in tuberculosis incidence and their determinants in 134 countries. *Bull World Health Organ.* 2009; **87**(9): 683-91.
2. World Health Organization, "Global Tuberculosis Control: A Short Update To The 2009 Report" WHO. 2009: 6-32.
3. Matteelli A, Migliori GB, Cirillo D, Centis R, Girard E, Raviglione M. Multidrug-resistant and extensively drug-resistant Mycobacterium tuberculosis: epidemiology and control. *Expert Rev Anti Infect Ther.* 2007; **5**(5): 857-71.
4. Colditz GA, Brewer TF, Berkey CS, Wilson ME, Burdick E, Fineberg HV, et al. Efficacy of BCG vaccine in the prevention of tuberculosis. Meta-analysis of the published literature. *JAMA.* 1994; **271**(9): 698-702.
5. Minassian A. Tuberculosis vaccines: present and future. *Expert Reviews in Respiratory Medicine.* 2008; **2**(6): 721-38.
6. McShane H, Pathan AA, Sander CR, Keating SM, Gilbert SC, Huygen K, et al. Recombinant modified vaccinia virus Ankara expressing antigen 85A boosts BCG-primed and naturally acquired antimycobacterial immunity in humans. *Nat Med.* 2004; **10**(11): 1240-4.
7. Pathan AA, Sander CR, Fletcher HA, Poulton I, Alder NC, Beveridge NE, et al. Boosting BCG with recombinant modified vaccinia ankara expressing antigen 85A: different boosting intervals and implications for efficacy trials. *PLoS One.* 2007; **2**(10): e1052.
8. Hawkridge T, Scriba TJ, Gelderbloem S, Smit E, Tameris M, Moyo S, et al. Safety and immunogenicity of a new tuberculosis vaccine, MVA85A, in healthy adults in South Africa. *J Infect Dis.* 2008; **198**(4): 544-52.
9. Brookes RH, Hill PC, Owiafe PK, Ibanga HB, Jeffries DJ, Donkor SA, et al. Safety and immunogenicity of the candidate tuberculosis vaccine MVA85A in West Africa. *PLoS One.* 2008; **3**(8): e2921.
10. Sander CR, Pathan AA, Beveridge NE, Poulton I, Minassian A, Alder N, et al. Safety and immunogenicity of a new tuberculosis vaccine, MVA85A, in Mycobacterium tuberculosis-infected individuals. *Am J Respir Crit Care Med.* 2009; **179**(8): 724-33.
11. Scriba TJ, Tameris M, Mansoor N, Smit E, van der Merwe L, Isaacs F, et al. Modified vaccinia Ankara-expressing Ag85A, a novel tuberculosis vaccine, is safe in adolescents and children, and induces polyfunctional CD4+ T cells. *Eur J Immunol.* **40**(1): 279-90.
12. Carroll MW, Moss B. Host range and cytopathogenicity of the highly attenuated MVA strain of vaccinia virus: propagation and generation of recombinant viruses in a nonhuman mammalian cell line. *Virology.* 1997; **238**(2): 198-211.
13. Meyer H, Sutter G, Mayr A. Mapping of deletions in the genome of the highly attenuated vaccinia virus MVA and their influence on virulence. *J Gen Virol.* 1991; **72** ( Pt 5): 1031-8.
14. Cosma A, Nagaraj R, Buhler S, Hinkula J, Busch DH, Sutter G, et al. Therapeutic vaccination with MVA-HIV-1 nef elicits Nef-specific T-helper cell responses in chronically HIV-1 infected individuals. *Vaccine.* 2003; **22**(1): 21-9.
15. Harrer E, Bauerle M, Ferstl B, Chaplin P, Petzold B, Mateo L, et al. Therapeutic vaccination of HIV-1-infected patients on HAART with a recombinant HIV-1 nef-expressing MVA: safety, immunogenicity and influence on viral load during treatment interruption. *Antivir Ther.* 2005; **10**(2): 285-300.

16. Dorrell L, Williams P, Suttill A, Brown D, Roberts J, Conlon C, et al. Safety and tolerability of recombinant modified vaccinia virus Ankara expressing an HIV-1 gag/multi-epitope immunogen (MVA.HIVA) in HIV-1-infected persons receiving combination antiretroviral therapy. *Vaccine*. 2007; **25**(17): 3277-83.
17. Bejon P, Peshu N, Gilbert SC, Lowe BS, Molyneux CS, Forsdyke J, et al. Safety profile of the viral vectors of attenuated fowlpox strain FP9 and modified vaccinia virus Ankara recombinant for either of 2 preerythrocytic malaria antigens, ME-TRAP or the circumsporozoite protein, in children and adults in Kenya. *Clin Infect Dis*. 2006; **42**(8): 1102-10.
18. Stittelaar KJ, Kuiken T, de Swart RL, van Amerongen G, Vos HW, Niesters HG, et al. Safety of modified vaccinia virus Ankara (MVA) in immune-suppressed macaques. *Vaccine*. 2001; **19**(27): 3700-9.
19. Beveridge NE, Price DA, Casazza JP, Pathan AA, Sander CR, Asher TE, et al. Immunisation with BCG and recombinant MVA85A induces long-lasting, polyfunctional Mycobacterium tuberculosis-specific CD4+ memory T lymphocyte populations. *Eur J Immunol*. 2007; **37**(11): 3089-100.
20. Douek DC, Brenchley JM, Betts MR, Ambrozak DR, Hill BJ, Okamoto Y, et al. HIV preferentially infects HIV-specific CD4+ T cells. *Nature*. 2002; **417**(6884): 95-8.
21. Newson R. Parameters behind “non-parametric” statistics: Kendal Tau, Somers’D and median differences. *The Stata Journal*. 2002; **2**(1): 45-64.
22. Beveridge NE, Fletcher HA, Hughes J, Pathan AA, Scriba TJ, Minassian A, et al. A comparison of IFN-gamma detection methods used in tuberculosis vaccine trials. *Tuberculosis (Edinb)*. 2008; **88**(6): 631-40.
23. Korenromp EL, Williams BG, Schmid GP, Dye C. Clinical prognostic value of RNA viral load and CD4 cell counts during untreated HIV-1 infection--a quantitative review. *PLoS One*. 2009; **4**(6): e5950.
24. Schnittman SM, Lane HC, Greenhouse J, Justement JS, Baseler M, Fauci AS. Preferential infection of CD4+ memory T cells by human immunodeficiency virus type 1: evidence for a role in the selective T-cell functional defects observed in infected individuals. *Proc Natl Acad Sci U S A*. 1990; **87**(16): 6058-62.
25. Brenchley JM, Hill BJ, Ambrozak DR, Price DA, Guenaga FJ, Casazza JP, et al. T-cell subsets that harbor human immunodeficiency virus (HIV) in vivo: implications for HIV pathogenesis. *J Virol*. 2004; **78**(3): 1160-8.
26. Lore K, Smed-Sorensen A, Vasudevan J, Mascola JR, Koup RA. Myeloid and plasmacytoid dendritic cells transfer HIV-1 preferentially to antigen-specific CD4+ T cells. *J Exp Med*. 2005; **201**(12): 2023-33.
27. Casazza JP, Brenchley JM, Hill BJ, Ayana R, Ambrozak D, Roederer M, et al. Autocrine production of beta-chemokines protects CMV-Specific CD4 T cells from HIV infection. *PLoS Pathog*. 2009; **5**(10): e1000646.

**TABLE and FIGURE LEGENDS**

**Table 1** *Subject demographics*: Comparison of low and high dose vaccination groups.

**Tables 2a and b** *Local and systemic adverse events*: Comparison of low and high dose vaccination groups with dose-matched HIV-uninfected subjects from previous trials of MVA85A. There were significantly fewer systemic AEs per person, (and a lower frequency of systemic AEs overall,) in the 10 HIV-infected subjects receiving high dose MVA85A compared with HIV-uninfected subjects receiving the same dose of vaccine ( $p=0.026$ , data not shown and Pathan *et al*, unpublished)

**Table 3a** *Ex-vivo IFN- $\gamma$  ELISpot statistics (1)*: Comparison of screening, week 1 and week 24 responses within low and high dose groups, for both summed and single pooled peptides, using Wilcoxon signed rank test. Median (range), median difference (range, of week 1 and week 24 responses compared to screening,) and  $p$ -values are shown.

**Table 3b** *Ex-vivo IFN- $\gamma$  ELISpot statistics (2)*: Comparison of responses between HIV-infected and HIV-uninfected subjects, at each time-point and each vaccine dose, using Mann-Whitney U test. Median (range), difference in medians (with 95% confidence intervals), and  $p$ -values are shown. AUC analysis is also shown.

Deleted: Consort flowcharts

**Figure 1** *CONSORT diagram*. Follow-up was conducted for 24 weeks post-vaccination in both the low dose MVA85A ( $5 \times 10^7$  pfu; left panels) and high dose MVA85A ( $1 \times 10^8$  pfu; right panels) groups. Of the volunteers excluded at screening, 5/15 had CD4 counts  $< 350 \times 10^6/L$  and/or exhibited progressively decreasing CD4 counts, 2/15 had HIV RNA loads of  $> 100,000$  copies/mL, 2/15 had abnormal chest radiographs, 1/15 had a current history of active eczema, and 1/15 had a history of illicit drug usage and unstable depression; the remaining 4/15 were eligible but failed to attend for vaccination (2 in each dose group).

**Figure 2 (a-d)** *Comparison of pre and post-vaccination CD4 counts*: Longitudinal CD4 counts of subjects in the low dose ( $5 \times 10^7$  pfu MVA85A) group pre-vaccination, (a); and high dose ( $1 \times 10^8$  pfu MVA85A) group (c) pre-vaccination. Longitudinal CD4 counts post-vaccination (up to 24 weeks) in the low dose (b) and high dose (d) groups. NB X-axis for the pre-vaccination data is not standardised for time but varies from 1-6 years depending on the individual subject. (e-h) *Comparison of pre and post-vaccination HIV RNA loads*: Longitudinal HIV RNA loads of subjects in the low dose (e) and high dose (g) groups pre-vaccination. Longitudinal HIV RNA loads post-vaccination (up to 24 weeks) in the low dose (f) and high dose (h) groups. Anonymous number codes (001-036) shown in key. NB X-axis for the pre-vaccination data is not standardised for time but varies from 1-6 years depending on the individual subject.

**Figure 3 (a-d)** *IFN- $\gamma$  ELISpot responses in the low dose and high dose groups*. Longitudinal responses to the single 85A peptide pool are shown for the low dose ( $5 \times 10^7$  pfu MVA85A) group, (a) and high dose ( $1 \times 10^8$  pfu MVA85A) group (b).



1  
2  
3  
4  
5  
6  
7  
8  
9  
10  
11  
12  
13  
14  
15  
16  
17  
18  
19  
20  
21  
22  
23  
24  
25  
26  
27  
28  
29  
30  
31  
32  
33  
34  
35  
36  
37  
38  
39  
40  
41  
42  
43  
44  
45  
46  
47  
48  
49  
50  
51  
52  
53  
54  
55  
56  
57  
58  
59  
60

Longitudinal responses to the summed 85A peptide pools are shown for the low dose (c) and high dose (d) groups. Horizontal bars represent the median response.

*Comparison of IFN- $\gamma$  ELISpot responses in HIV-infected and HIV-uninfected subjects (e-g).* Responses to summed 85A peptide pools for low dose and high dose vaccine regimes at screening (e); week 1 post-vaccination (f) and week 24 post-vaccination (g). Subjects with LTBI are denoted with grey symbols. Statistically significant differences in the responses between HIV-infected and HIV-uninfected subjects were assessed using the Mann-Whitney U test. \* $p < 0.05$ ; \*\* $p < 0.01$ ; \*\*\* $p < 0.001$ . Horizontal bars represent the median response.

**Figure 4** *MVA85A induces polyfunctional Ag85A-specific CD4+ T cells in HIV-infected individuals.* MVA85A vaccination-induced production of IFN- $\gamma$ , IL-2, MIP-1 $\beta$  and TNF- $\alpha$  by antigen-specific CD4+ T cells was assessed following Ag85A peptide stimulation of cryopreserved PBMC using polychromatic flow cytometry. (a) Individual data points are shown with median line, interquartile range (open bars) and range (whiskers) at baseline and at each time-point post-vaccination for every possible combination of cytokine/chemokine production. High dose and low dose groups were analyzed together (n=17). (b) The functional profile of the Ag85A-specific CD4+ T cell response is summarized in the pie charts (n=17). CD4+ T cells producing a given number of cytokines/chemokines are grouped and colour-coded together. Pie charts are shown for the high dose HIV-infected group (n=9), the low dose HIV-infected group (n=8) and low dose healthy controls (n=6). (c) Absolute percentages of the highest frequency CD4+ T cell subsets producing specific combinations of chemokine/cytokines at week 1 post-vaccination across the different groups; \*  $p < 0.05$ , \*\*  $p < 0.01$ .

1  
2  
3  
4  
5 **Figure 5** *Cytokine/chemokine production and receptor expression*

6 (a) Absolute percent of Ag85A-specific CD4+ T cells producing IL-2 or MIP-1 $\beta$  at  
7 week 1 post-MVA85A vaccination in HIV-infected subjects (low dose and high dose,  
8 n=17) versus healthy controls (n=6). Representative histogram (b) and scatter plot (c)  
9 showing CCR5 median fluorescence intensity (MFI) in naïve CD4+ T cells, memory  
10 CD4+ T cells and activated Ag85A-specific CD4+ T cells at week 1 post-  
11 vaccination (n=16 in all groups). (d) Scatter plot showing CCR5 integrated MFI  
12 (iMFI) for naïve, memory and Ag85A-specific CD4+ T cells (n=16). Line charts  
13 showing CCR5 MFI in memory CD4+ T cells (e) and the total CD4+ T cell  
14 population (f) across the MVA85A vaccination time-course (n=16). \*  $p < 0.05$ , \*\*  
15  $p < 0.01$ .

16  
17  
18  
19  
20  
21  
22  
23  
24  
25  
26  
27  
28  
29  
30  
31  
32  
33  
34  
35  
36  
37  
38  
39  
40  
41  
42  
43  
44  
45  
46  
47  
48  
49  
50  
51  
52  
53  
54  
55  
56  
57  
58  
59  
60

1  
2  
3  
4  
5  
6  
7  
8  
9  
10  
11  
12  
13  
14  
15  
16  
17  
18  
19  
20  
21  
22  
23  
24  
25  
26  
27  
28  
29  
30  
31  
32  
33  
34  
35  
36  
37  
38  
39  
40  
41  
42  
43  
44  
45  
46  
47  
48  
49  
50  
51  
52  
53  
54  
55  
56  
57  
58  
59  
60

For peer review only

TABLE 1

| Demographics and screening results        |               | Low dose<br>5x10 <sup>7</sup> pfu | High dose<br>1x10 <sup>8</sup> pfu |
|-------------------------------------------|---------------|-----------------------------------|------------------------------------|
| <b>Sex</b>                                | Male          | 9 (90%)                           | 8 (80%)                            |
|                                           | Female        | 1 (10%)                           | 2 (20%)                            |
| <b>Median age (range)</b>                 |               | 35.8 (21-52)                      | 35.1 (27-46)                       |
| <b>Continent of Birth</b>                 | Africa        | 4 (40%)                           | 4 (40%)                            |
|                                           | Asia          | 0                                 | 1 (10%)                            |
|                                           | Europe        | 4 (40%)                           | 5 (40%)                            |
|                                           | North America | 1 (10%)                           | 0                                  |
|                                           | South America | 1 (10%)                           | 0                                  |
| <b>BCG</b>                                | Definite      | 7 (70%)                           | 10 (100%)                          |
|                                           | Uncertain     | 3 (30%)                           | 0 (0%)                             |
| <b>Latent infection (ESAT-6/CFP-10 +)</b> |               | 2 (20%)                           | 3 (30%)                            |
| <b>Median CD4 count (range)</b>           |               | 570<br>(430-1200)                 | 625<br>(410-840)                   |
| <b>Median HIV RNA load (range)</b>        |               | 6069 (39-<br>41890)               | 14805 (49-<br>71090)               |

TABLE 2

(a)

| Local Adverse Events | HIV-infected                  |                               | HIV-negative                  |                               |
|----------------------|-------------------------------|-------------------------------|-------------------------------|-------------------------------|
|                      | 5x10 <sup>7</sup> pfu<br>n=10 | 1x10 <sup>8</sup> pfu<br>n=10 | 5x10 <sup>7</sup> pfu<br>n=43 | 1x10 <sup>8</sup> pfu<br>n=12 |
| Redness              | 10 (100%)                     | 10 (100%)                     | 42 (98%)                      | 12 (100%)                     |
| Pruritis             | 10 (100%)                     | 9 (90%)                       | 22 (51%)                      | 8 (67%)                       |
| Pain                 | 8 (80%)                       | 7 (70%)                       | 36 (84%)                      | 12 (100%)                     |
| Induration           | 10 (100%)                     | 10 (100%)                     | 42 (98%)                      | 12 (100%)                     |

(b)

| Systemic Adverse Events            | HIV-infected                  |                               | HIV-negative                  |                               |
|------------------------------------|-------------------------------|-------------------------------|-------------------------------|-------------------------------|
|                                    | 5x10 <sup>7</sup> pfu<br>n=10 | 1x10 <sup>8</sup> pfu<br>n=10 | 5x10 <sup>7</sup> pfu<br>n=43 | 1x10 <sup>8</sup> pfu<br>n=12 |
| Measured fever                     | 1 (10%)                       | 0 (0%)                        | 3 (7%)                        | 5 (42%)                       |
| Subjective fever                   | 3 (30%)                       | 2 (20%)                       | 17 (40%)                      | 9 (75%)                       |
| Arthralgia                         | 2 (20%)                       | 3 (30%)                       | 6 (14%)                       | 7 (58%)                       |
| Headache                           | 6 (60%)                       | 4 (40%)                       | 21 (49%)                      | 10 (83%)                      |
| Myalgia                            | 1 (10%)                       | 2 (20%)                       | 18 (42%)                      | 9 (75%)                       |
| Nausea                             | 1 (10%)                       | 0 (0%)                        | 4 (9%)                        | 4 (33%)                       |
| Vasovagal syncope                  | 0 (0%)                        | 1 (10%)                       | 0 (0%)                        | 0 (0%)                        |
| Axillary lymphadenopathy           | 1 (10%)                       | 0 (0%)                        | 2 (5%)                        | 2 (17%)                       |
| Change in haematology/biochemistry | 0 (0%)                        | 0 (0%)                        | 0 (0%)                        | 0 (0%)                        |

Deleted: F

Deleted: F

Deleted: ish

TABLE 3

(a)  
Summed pooled peptides – within dose changes from screening to peak and plateau

| Dose |                                                   | Screening<br>(n=10) | Week 1<br>(n=10) | Week 24<br>(n=10)   |
|------|---------------------------------------------------|---------------------|------------------|---------------------|
| Low  | Median (range)                                    | 10 (3, 20)          | 738 (109, 4398)  | 20 (0, 237) n=9     |
|      | Median difference (range) (compared to screening) |                     | 730 (109, 4383)  | 17 (-8, 218)<br>n=9 |
|      | <i>p</i> -value*                                  |                     | 0.007            | 0.17                |
| High | Median (range)                                    | 3 (0, 14)           | 1730 (758, 2138) | 42 (33, 256)        |
|      | Median difference (range) (compared to screening) |                     | 1721 (743, 2135) | 42 (27, 247)        |
|      | <i>p</i> -value*                                  |                     | 0.005            | 0.007               |

\*Wilcoxon signed rank test

Single pooled peptides – within dose changes from screening to peak and plateau

| Dose |                                                   | Screening<br>(n=10) | Week 1<br>(n=10)      | Week 24<br>(n=10) |
|------|---------------------------------------------------|---------------------|-----------------------|-------------------|
| Low  | Median (range)                                    | 0 (0, 8) n=9        | 393 (67, 1275) n=9    | 13 (2, 103) n=9   |
|      | Median difference (range) (compared to screening) |                     | 393 (60, 1272)<br>n=9 | 13 (2, 97)<br>n=9 |
|      | <i>p</i> -value*                                  |                     | 0.009                 | 0.032             |
| High | Median (range)                                    | 0 (0, 8)            | 502 (312, 677)        | 14 (0, 68)        |
|      | Median difference (range) (compared to screening) |                     | 502 (294, 677)        | 14 (0, 66)        |
|      | <i>p</i> -value*                                  |                     | 0.005                 | 0.048             |

\*Wilcoxon signed rank test

(b)

## HIV-infected vs. HIV-negative group

|                      | Summed Pooled peptides | Median (range) HIV+           | Median (range) HIV-             | Difference in medians<br>(95% confidence interval) | <i>p</i> -value* |
|----------------------|------------------------|-------------------------------|---------------------------------|----------------------------------------------------|------------------|
| Week 1               | Low dose               | 738<br>(109, 4398)<br>n=10    | 2147<br>(1173, 5085)<br>n=21    | 1101<br>(-393, 2873)                               | 0.12             |
|                      | High dose              | 1730<br>(758, 2138)<br>n=10   | 6493<br>(4854, 7312)<br>n=12    | 4557<br>(3038, 5904)                               | 0.0001           |
| Week 24              | Low dose               | 20<br>(0, 237)<br>n=9         | 385<br>(228, 1010)<br>n=20      | 339<br>(161, 534)                                  | 0.004            |
|                      | High dose              | 42<br>(33, 256)<br>n=10       | 970<br>(655, 1199)<br>n=12      | 820<br>(569, 1050)                                 | 0.0001           |
| Area under the curve | Low dose               | 2162<br>(519, 23348)<br>n=9   | 16317<br>(9129, 36418)<br>n=20  | 11884<br>(3191, 17387)                             | 0.02             |
|                      | High dose              | 5929<br>(3167, 11607)<br>n=10 | 41575<br>(26919, 53807)<br>n=12 | 31384<br>(20778, 45504)                            | 0.0001           |

Figure 1

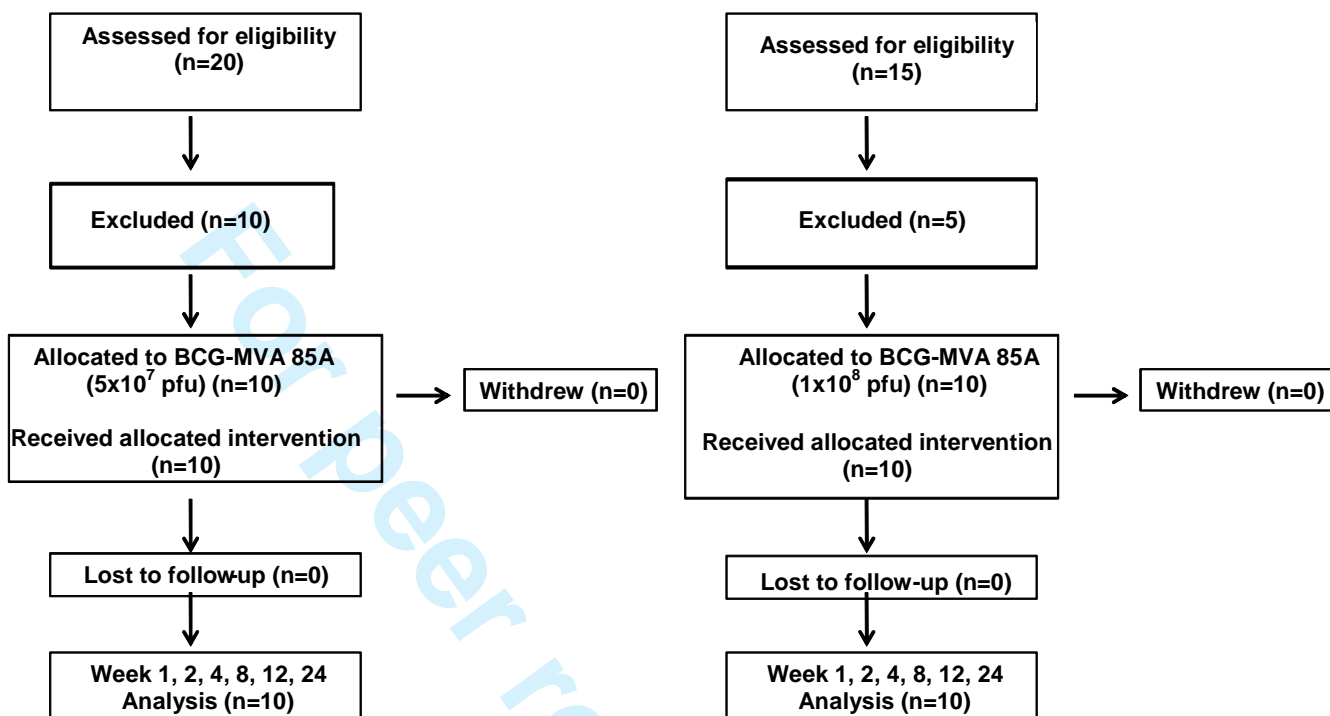



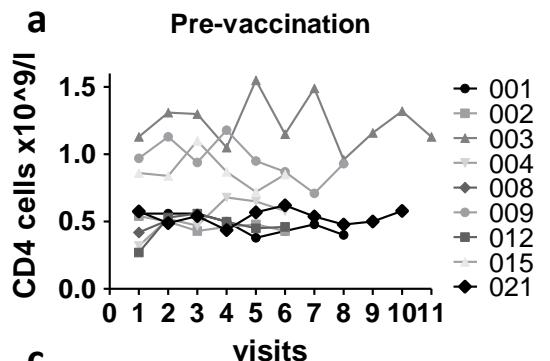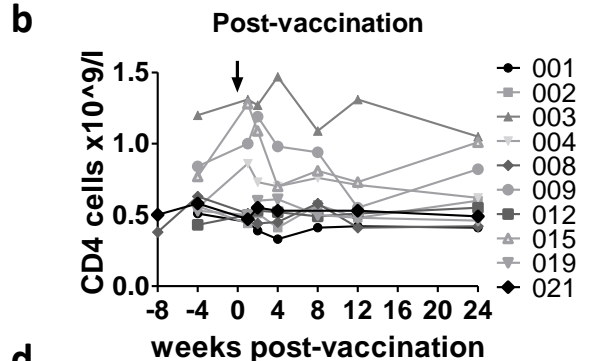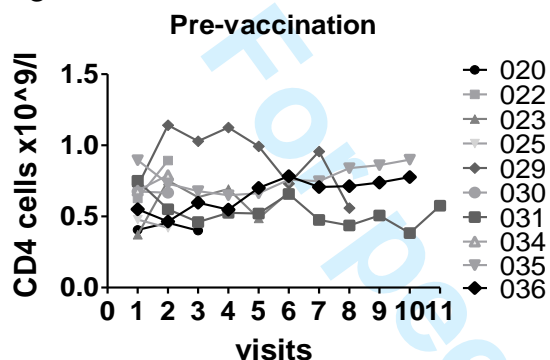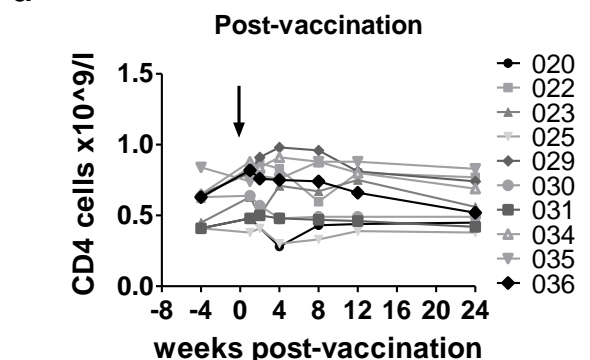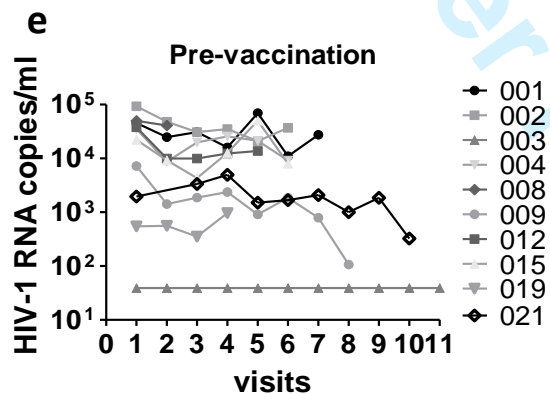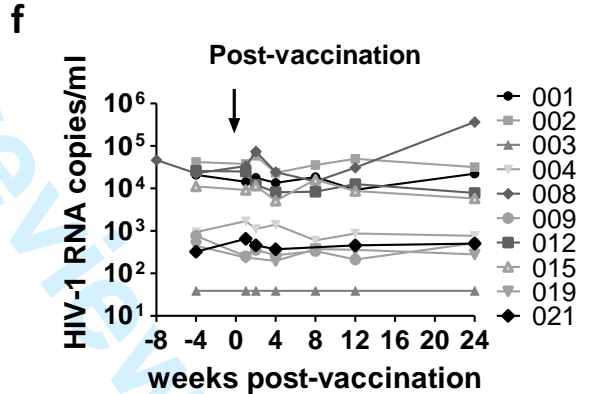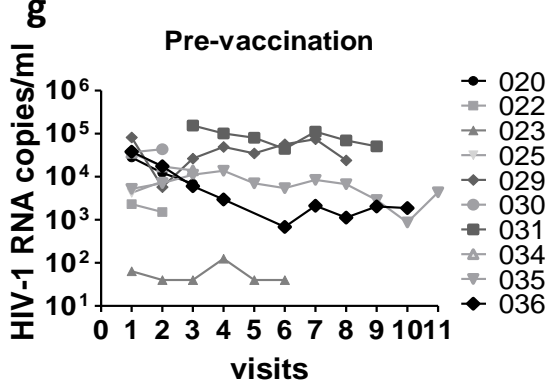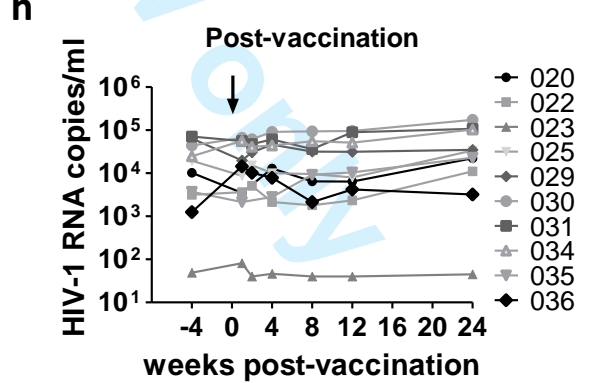

Figure 3



## Figure 4

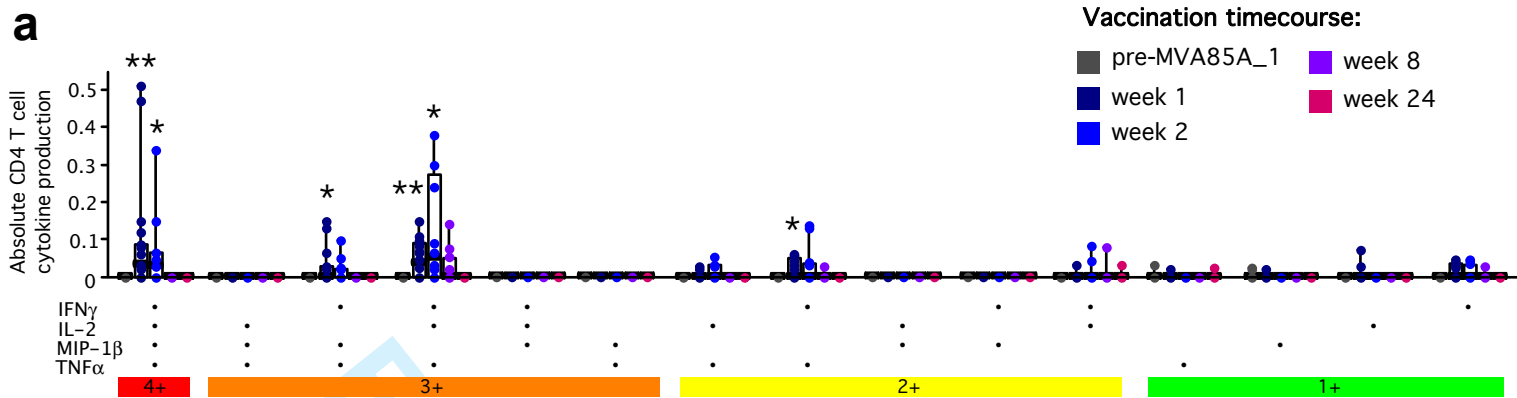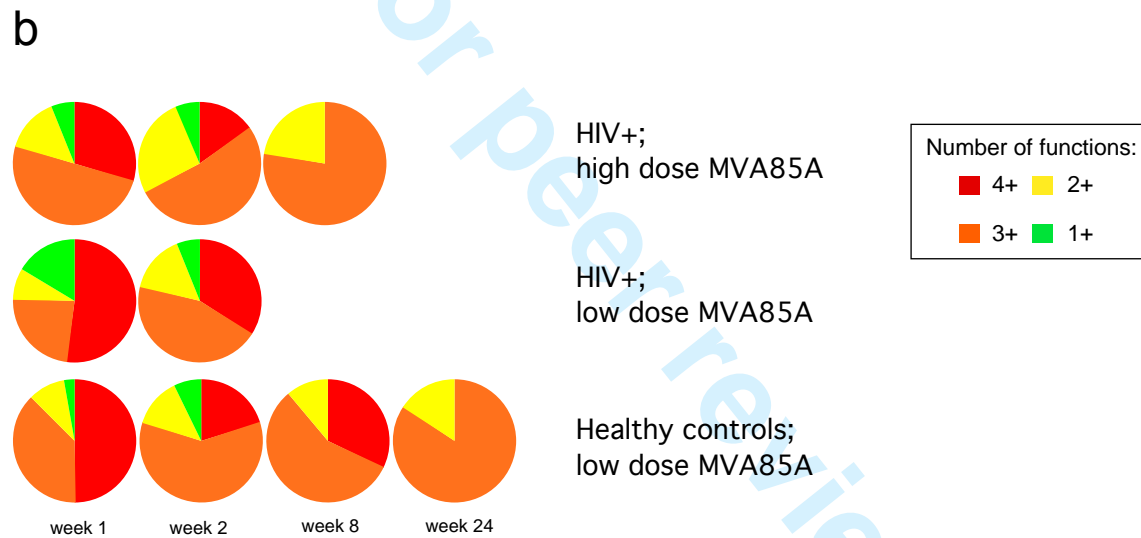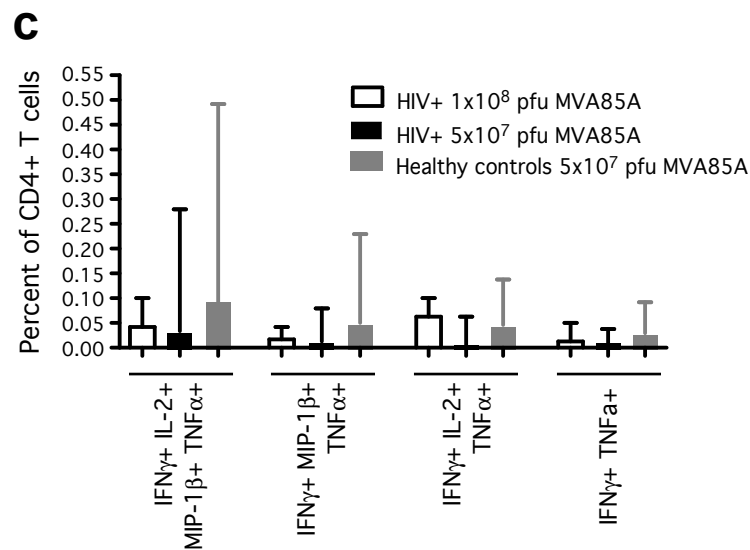

Figure 5

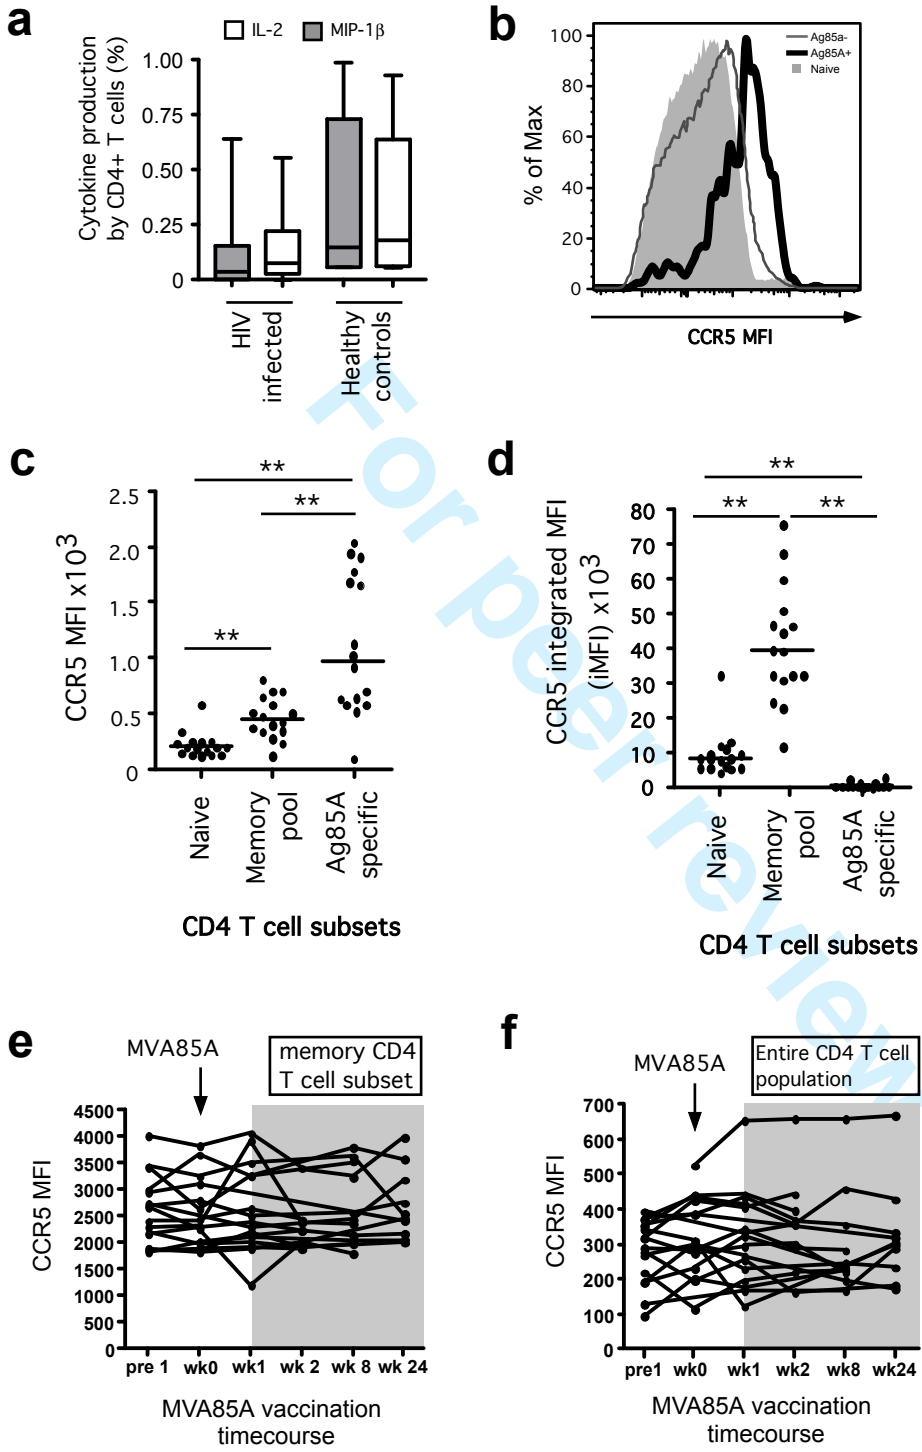



**A Phase I study evaluating the safety and immunogenicity of MVA85A, a candidate TB vaccine, in HIV-infected adults**

|                                 |                                                                                                                                                                                                                                                                                                                                                                                                                                                                                                                                                                                                                                                                                                                                                                                                                                                                                                                                                                                                                                                                                                                                                                                                                                                                                                                                                                                                                                                                                                                                                                                                                                                                                                                                            |
|---------------------------------|--------------------------------------------------------------------------------------------------------------------------------------------------------------------------------------------------------------------------------------------------------------------------------------------------------------------------------------------------------------------------------------------------------------------------------------------------------------------------------------------------------------------------------------------------------------------------------------------------------------------------------------------------------------------------------------------------------------------------------------------------------------------------------------------------------------------------------------------------------------------------------------------------------------------------------------------------------------------------------------------------------------------------------------------------------------------------------------------------------------------------------------------------------------------------------------------------------------------------------------------------------------------------------------------------------------------------------------------------------------------------------------------------------------------------------------------------------------------------------------------------------------------------------------------------------------------------------------------------------------------------------------------------------------------------------------------------------------------------------------------|
| Journal:                        | <i>BMJ Open</i>                                                                                                                                                                                                                                                                                                                                                                                                                                                                                                                                                                                                                                                                                                                                                                                                                                                                                                                                                                                                                                                                                                                                                                                                                                                                                                                                                                                                                                                                                                                                                                                                                                                                                                                            |
| Manuscript ID:                  | bmjopen-2011-000223.R2                                                                                                                                                                                                                                                                                                                                                                                                                                                                                                                                                                                                                                                                                                                                                                                                                                                                                                                                                                                                                                                                                                                                                                                                                                                                                                                                                                                                                                                                                                                                                                                                                                                                                                                     |
| Article Type:                   | Research                                                                                                                                                                                                                                                                                                                                                                                                                                                                                                                                                                                                                                                                                                                                                                                                                                                                                                                                                                                                                                                                                                                                                                                                                                                                                                                                                                                                                                                                                                                                                                                                                                                                                                                                   |
| Date Submitted by the Author:   | 26-Sep-2011                                                                                                                                                                                                                                                                                                                                                                                                                                                                                                                                                                                                                                                                                                                                                                                                                                                                                                                                                                                                                                                                                                                                                                                                                                                                                                                                                                                                                                                                                                                                                                                                                                                                                                                                |
| Complete List of Authors:       | Minassian, Angela; University of Oxford, The Jenner Institute<br>Rowland, Rosalind; University of Oxford, The Jenner Institute<br>Beveridge, Natalie; University of Oxford, The Jenner Institute<br>Satti, Iman; University of Oxford, The Jenner Institute<br>Harris, Stephanie; University of Oxford, The Jenner Institute<br>Poyntz, Hazel; University of Oxford, The Jenner Institute<br>Hamill, Matthew; University of Oxford, The Jenner Institute<br>Griffiths, Kristin; University of Oxford, The Jenner Institute<br>Sander, Clare; University of Oxford, The Jenner Institute<br>Ambrozak, David; NIAID, Vaccine Research Center<br>Price, David; Human Immunology Section, Vaccine Research Center, NIAID, National Institutes of Health<br>Hill, Brenna; NIAID, Vaccine Research Center<br>Casazza, Joseph; NIAID, Vaccine Research Center<br>Douek, Daniel; NIAID, Vaccine Research Center<br>Koup, Richard; NIAID, Vaccine Research Center<br>Roederer, Mario; NIAID, Vaccine Research Center<br>Winston, Alan; Imperial College Healthcare NHS Trust<br>Ross, Jonathan; University Hospitals Birmingham NHS Foundation Trust<br>Sherrard, Jackie; Oxford Radcliffe Hospitals NHS Trust, Genito-urinary Medicine Department, Churchill Hospital<br>Rooney, Guy; Great Western Hospitals NHS Foundation Trust, Great Western Hospital<br>Williams, Nicola; University of Oxford, Centre for Statistics in Medicine<br>Lawrie, Alison; Oxford University, The Jenner Institute<br>Pathan, Ansar; University of Oxford, The Jenner Institute<br>Fletcher, Helen; Oxford University, The Jenner Institute<br>Poulton, Ian; Oxford University, The Jenner Institute<br>McShane, Helen; University of Oxford, The Jenner Institute |
| <b>Primary Subject Heading</b>: | Infectious diseases                                                                                                                                                                                                                                                                                                                                                                                                                                                                                                                                                                                                                                                                                                                                                                                                                                                                                                                                                                                                                                                                                                                                                                                                                                                                                                                                                                                                                                                                                                                                                                                                                                                                                                                        |
| Keywords:                       | Tuberculosis < INFECTIOUS DISEASES, HIV & AIDS < INFECTIOUS DISEASES, IMMUNOLOGY                                                                                                                                                                                                                                                                                                                                                                                                                                                                                                                                                                                                                                                                                                                                                                                                                                                                                                                                                                                                                                                                                                                                                                                                                                                                                                                                                                                                                                                                                                                                                                                                                                                           |
|                                 |                                                                                                                                                                                                                                                                                                                                                                                                                                                                                                                                                                                                                                                                                                                                                                                                                                                                                                                                                                                                                                                                                                                                                                                                                                                                                                                                                                                                                                                                                                                                                                                                                                                                                                                                            |

1  
2  
3  
4  
5  
6  
7  
8  
9  
10  
11  
12  
13  
14  
15  
16  
17  
18  
19  
20  
21  
22  
23  
24  
25  
26  
27  
28  
29  
30  
31  
32  
33  
34  
35  
36  
37  
38  
39  
40  
41  
42  
43  
44  
45  
46  
47  
48  
49  
50  
51  
52  
53  
54  
55  
56  
57  
58  
59  
60

SCHOLARONE™  
Manuscripts

For peer review only

1  
2  
3  
4  
5 **A Phase I study evaluating the safety and immunogenicity of**  
6  
7 **MVA85A, a candidate TB vaccine, in HIV-infected adults**  
8  
9

10  
11  
12  
13 Angela M Minassian<sup>1</sup>, Rosalind Rowland<sup>1</sup>, Natalie ER Beveridge<sup>1</sup>, Ian D Poulton<sup>1</sup>,  
14  
15 Iman Satti<sup>1</sup>, Stephanie Harris<sup>1</sup>, Hazel Poyntz<sup>1</sup>, Matthew Hamill<sup>1</sup>, Kristin Griffiths<sup>1</sup>,  
16  
17 Clare R Sander<sup>1</sup>, David R Ambrozak<sup>2</sup>, David A Price<sup>3, 4</sup>, Brenna J Hill<sup>3</sup>, Joseph P  
18  
19 Casazza<sup>2</sup>, Daniel C Douek<sup>3</sup>, Richard A Koup<sup>2</sup>, Mario Roederer<sup>5</sup>, Alan Winston<sup>6</sup>,  
20  
21 Jonathan Ross<sup>7</sup>, Jackie Sherrard<sup>8</sup>, Guy Rooney<sup>9</sup>, Nicola Williams<sup>10</sup>, Alison M  
22  
23 Lawrie<sup>1</sup>, Helen A Fletcher<sup>1</sup>, Ansar A Pathan<sup>1\*</sup> and Helen McShane<sup>1</sup>  
24  
25  
26  
27  
28

29  
30 <sup>1</sup> The Jenner Institute, Old Road Campus Research Building, Oxford University, Oxford, OX3 7DQ,  
31  
32 UK

33  
34 <sup>2</sup> Immunology Laboratory, Vaccine Research Center, NIAID, National Institutes of Health, Bethesda,  
35  
36 Maryland, USA

37  
38 <sup>3</sup> Human Immunology Section, Vaccine Research Center, NIAID, National Institutes of Health,  
39  
40 Bethesda, Maryland, USA

41  
42 <sup>4</sup> Department of Infection, Immunity & Biochemistry, Cardiff University School of Medicine, Cardiff,  
43  
44 Wales, UK

45  
46 <sup>5</sup> Immuno-Technology Section, Vaccine Research Center, NIAID, National Institutes of Health,  
47  
48 Bethesda, Maryland, USA

49  
50 <sup>6</sup> Imperial College Healthcare NHS Trust, Praed Street, London, W2 1NY, UK

51  
52 <sup>7</sup> Selly Oak Hospital, Selly Oak, University Hospitals Birmingham NHS Foundation Trust, B29 6JD,  
53  
54 UK

55  
56 <sup>8</sup> Genito-urinary Medicine Department, Churchill Hospital, Oxford Radcliffe Hospitals NHS Trust,  
57  
58 Oxford, OX3 7LJ, UK

59  
60 <sup>9</sup> Great Western Hospital, Great Western Hospitals NHS Foundation Trust, Swindon, UK

<sup>10</sup> Centre for Statistics in Medicine, Wolfson College Annexe, University of Oxford, Linton Road,  
Oxford OX2 6UD

1  
2  
3  
4  
5  
6  
7  
8  
9  
10  
11  
12  
13  
14  
15  
16  
17  
18  
19  
20  
21  
22  
23  
24  
25  
26  
27  
28  
29  
30  
31  
32  
33  
34  
35  
36  
37  
38  
39  
40  
41  
42  
43  
44  
45  
46  
47  
48  
49  
50  
51  
52  
53  
54  
55  
56  
57  
58  
59  
60

\* Now at Centre for Infection, Immunity and Disease Mechanisms, Biosciences, School of Health Sciences and Social Care, Brunel University, Uxbridge UB8 3PH, West London, UK

Correspondence to Helen McShane, [helen.mcshane@ndm.ox.ac.uk](mailto:helen.mcshane@ndm.ox.ac.uk)

Short title: Phase I study with MVA85A in HIV

For peer review only



**ABSTRACT**

**OBJECTIVES:** Control of the TB epidemic is a global health priority and one that is only likely to be achieved through vaccination. The critical overlap with the HIV epidemic requires any effective TB vaccine regimen to be safe in individuals who are infected with HIV. The objectives of this clinical trial were to evaluate the safety and immunogenicity of a leading candidate TB vaccine, MVA85A, in healthy, HIV-infected adults.

**DESIGN:** This was an open-label Phase I trial, performed in 20 healthy HIV-infected, antiretroviral-naïve subjects. Two different doses of MVA85A were each evaluated as a single immunisation in 10 subjects, with 24 weeks of follow-up. Safety of MVA85A was assessed by clinical and laboratory markers, including regular CD4 counts and HIV RNA load measurements. Vaccine immunogenicity was assessed by *ex-vivo* IFN- $\gamma$  ELISpot assays and flow cytometric analysis.

**RESULTS:** MVA85A was safe in subjects with HIV infection, with an adverse event profile comparable to historical data from previous trials in HIV-uninfected subjects. There were no clinically significant vaccine-related changes in CD4 count or HIV RNA load in any subjects, and no evidence from qPCR analyses to indicate that MVA85A vaccination leads to widespread preferential infection of vaccine-induced CD4+ T cell populations. Both doses of MVA85A induced an antigen-specific IFN- $\gamma$  response that was durable for 24 weeks, although of a lesser magnitude compared to historical data from HIV-uninfected subjects. The functional quality of the vaccine-induced T cell response in HIV-infected subjects was remarkably comparable to that observed in healthy HIV-uninfected controls, but less durable.

1  
2  
3 **CONCLUSION:** MVA85A is safe and immunogenic in healthy adults infected with  
4  
5 HIV. Further safety and efficacy evaluation of this candidate vaccine in TB and HIV  
6  
7 endemic areas is merited.  
8  
9

## 10 11 12 **ARTICLE SUMMARY SECTION**

### 13 14 **Article focus**

- 15  
16 • HIV infection increases susceptibility to TB, and globally, TB is the cause of  
17  
18 death in up to half of AIDS deaths  
19  
20
- 21  
22 • There is an urgent need for a safe and effective TB vaccine in HIV-infected  
23  
24 people  
25  
26

### 27 **Key messages**

- 28  
29 • MVA85A, a leading candidate TB vaccine, is safe and well tolerated in HIV-  
30  
31 infected people and does not induce changes in either CD4 count or HIV RNA  
32  
33 load  
34  
35
- 36  
37 • MVA85A is immunogenic in HIV-infected people, and induces a similar  
38  
39 immune profile to that seen in HIV-uninfected people, but the immunogenicity  
40  
41 is less durable in HIV-infected people.  
42  
43

### 44 **Strengths and limitations of this study**

- 45  
46 • This is a Phase I study with 20 subjects, and further studies are needed in TB  
47  
48 endemic countries in this important target population.  
49  
50  
51  
52  
53  
54  
55

56 **Funding:** This study was supported by The Wellcome Trust (Grant number  
57  
58 WT076943MA), TBVAC (an EU 6<sup>th</sup> Framework programme grant) and The NIHR  
59  
60 Oxford Biomedical Research Centre.

## INTRODUCTION

Tuberculosis (TB) and Human Immune Deficiency Virus (HIV) are inextricably linked. At the end of 2007, approximately 33.2 million persons were living with HIV-1 infection, an estimated one-third of whom were co-infected with *Mycobacterium tuberculosis* (*M. tuberculosis*)<sup>1</sup>. TB is the cause of death for up to half of all AIDS patients<sup>2</sup> and the increasing incidence of drug-resistant strains of *M. tuberculosis* poses a significant threat to a susceptible HIV-infected population<sup>3</sup>.

*Mycobacterium bovis* (*M. bovis*) Bacille Calmette Guérin (BCG) fails to protect consistently against the adult pulmonary form of TB, whilst providing reliable protection against disseminated infection in childhood<sup>4</sup>. An improved vaccine strategy is thus essential for global control of this disease<sup>5</sup>. MVA85A (modified vaccinia virus Ankara expressing antigen 85A) is a leading candidate TB vaccine, designed to enhance the effect of BCG; it is safe and highly immunogenic in healthy BCG-naïve and BCG-vaccinated subjects, and in subjects latently infected with *M. tuberculosis* in the UK and Africa<sup>6-11</sup>.

It is essential that any new TB vaccine is safe in an HIV-infected population. Subunit vaccines are an ideal choice for an immuno-compromised population in which the safety of replicating whole organism vaccines may be a concern. Although MVA is a live viral vaccine vector, it cannot replicate in human cells<sup>12, 13</sup>. There are now safety data from a number of clinical trials with recombinant MVAs in HIV-infected subjects, which demonstrate no sustained effect on either HIV load or CD4 count<sup>14-16</sup>. Most of these studies assessed immune-reconstituted HIV-infected individuals on anti-retroviral therapy (ARV); however, some ARV-naïve subjects with more advanced HIV infection have also been vaccinated with a recombinant MVA, with no

1  
2  
3 significant rise in HIV load or fall in CD4 count over a 4-week follow-up period <sup>17</sup>.  
4  
5 Preclinical studies in severely immuno-suppressed macaques have also documented  
6  
7 safety in this model <sup>18</sup>. To date, MVA85A has been administered to more than 1,000  
8  
9 individuals with no vaccine-related serious adverse events <sup>6, 8-11</sup> (McShane,  
10  
11 unpublished data).  
12  
13

14  
15 Here we present the first clinical trial of a subunit TB vaccine in an HIV-infected  
16  
17 population. The primary endpoint was to evaluate the safety of two doses of  
18  
19 MVA85A in healthy HIV-infected subjects in the UK and the secondary endpoint was  
20  
21 to evaluate the immunogenicity of this vaccine regimen. .  
22  
23  
24  
25  
26  
27  
28  
29  
30  
31  
32  
33  
34  
35  
36  
37  
38  
39  
40  
41  
42  
43  
44  
45  
46  
47  
48  
49  
50  
51  
52  
53  
54  
55  
56  
57  
58  
59  
60

## METHODS

### Trial design and participants

The protocol for this multi-site study was approved by the Medicines and Healthcare products Regulatory Agency (MHRA) and ethical approval was obtained from the Gene Therapy Advisory Committee (GTAC). Participants were recruited from the Genitourinary Medicine (GUM) departments at the Oxford Radcliffe Hospitals NHS Trust, University Hospitals Birmingham NHS Foundation Trust (Selly Oak Hospital), Great Western Hospitals NHS Foundation Trust, and Imperial College Healthcare NHS Trust, London.

Potentially eligible subjects were referred to the clinical trial team. Vaccination visits took place in Oxford; screening and follow-up visits took place at local NHS Trust sites. Written informed consent was obtained from all subjects prior to enrolment in the trial, and the referring HIV physicians were notified.

Eligibility required participants to be generally healthy, aged 18-55 years, with a normal chest radiograph and no clinical or radiological evidence of TB disease, a current CD4 count (measured at screening) of at least  $350 \times 10^6/L$ , a nadir CD4 count of not less than  $300 \times 10^6/L$  and an HIV RNA load at screening of less than 100,000 copies/mL. All subjects were diagnosed with HIV infection at least six months before screening and had not received any ARVs within the preceding six months (full inclusion/exclusion criteria, Table 1). In all cases, testing for latent *M. tuberculosis* infection (LTBI) was conducted at screening using an in-house *ex-vivo* interferon gamma (IFN- $\gamma$ ) ELISpot assay for ESAT6 and CFP10 peptides. Subjects found to be latently infected were referred back to their consultants for possible treatment at the end of the trial.

1  
2  
3 The trial was registered on a clinical trials database: ClinicalTrials.gov ID  
4  
5 NCT00395720.  
6  
7

### 8 **Vaccine**

9  
10 Clinical grade MVA was produced under Good Manufacturing Practice standard by  
11  
12 IDT Biologika GmbH.  
13  
14

### 15 **Procedures**

16  
17 The first group of 10 subjects were vaccinated intradermally with MVA85A at a dose  
18  
19 of  $5 \times 10^7$  plaque-forming units (pfu); the second group of 10 subjects were  
20  
21 subsequently vaccinated with a dose of  $1 \times 10^8$  pfu MVA85A. Subjects were  
22  
23 sequentially allocated first to the low dose group and then once safety had been  
24  
25 demonstrated, to the high dose group. A diary card was completed by all subjects  
26  
27 recording local and systemic adverse events and body temperature for days 1 to 7  
28  
29 post-vaccination. All subjects were followed up regularly for 12 months; blood  
30  
31 samples taken at each time-point for CD4 count, HIV RNA load measurement and  
32  
33 cellular immunological assays. CD4 count and HIV RNA load results were  
34  
35 communicated to the patient's HIV physician at regular intervals. Routine  
36  
37 haematology and biochemistry assays were performed at weeks 1 and 12 after  
38  
39 vaccination. All subjects attended their usual NHS follow-up appointments and  
40  
41 received routine clinical care throughout the trial.  
42  
43  
44  
45  
46  
47  
48  
49  
50

### 51 **Immunological assays**

52  
53 *Ex vivo* IFN- $\gamma$  ELISpot assays were performed at screening and at weeks 1, 2, 4, 12,  
54  
55 and 24 post-vaccination using fresh peripheral blood mononuclear cells (PBMCs), as  
56  
57 described previously<sup>10</sup>. A single pool of 15-mer peptides spanning the Ag85A protein  
58  
59 (66, overlapping by 10 amino acids, 2 $\mu$ g/mL final concentration of each peptide in  
60

1  
2  
3 each well), and 7 pools of non-overlapping 9-10 Ag85A peptides (final concentration  
4 of 10µg/mL in each well) were used to stimulate for the IFN-γ ELISpot assays. For  
5  
6  
7  
8  
9 the 7 peptide pool wells, the results were summed across all peptide pools for each  
10  
11  
12 time-point. This potentially resulted in duplicate counting of T cells that responded to  
13  
14  
15 any of the 10mer overlap regions, since any 10mer occurred in two pools with  
16  
17  
18 adjacent peptides, but allows direct comparison with immunogenicity data from  
19  
20 previous trials.

21 Intracellular cytokine staining of PBMCs was performed as described previously<sup>19</sup>.  
22  
23 Briefly, cells were stained with the amine reactive LIVE/DEAD fixable dye ViViD  
24  
25 (Molecular Probes, Invitrogen) and then surface stained with monoclonal antibodies  
26  
27 against CD4, CD14, CD19, CD27, CD45RO, CD57 and CCR5. After washing, cells  
28  
29 were permeabilized (Cytofix/cytoperm kit; BD Pharmingen) and stained  
30  
31 intracellularly for CD3, CD8, IFN-γ, TNF-α, IL-2 and MIP-1β. Naïve CD4+ memory  
32  
33 cells were identified as CD45RO-CD27+CD57+; memory CD4 T cell as  
34  
35 CD45RO+CD27±CD57±. CD4+ T cells producing two or more cytokines (IFN-γ, IL-  
36  
37 2 or TNF-α) following stimulation with Ag85A peptides were sorted to greater than  
38  
39 98% purity using a modified FACS Aria flow cytometer (BD Biosciences); CMV-  
40  
41 specific CD4+ T cells, defined similarly, and bulk resting memory CD4+ T cells were  
42  
43 sorted simultaneously. Cytokine production and the expression of surface markers  
44  
45 were analysed using FlowJo version 8.7 (Tree Star Inc), Pestle version 1.5 and SPICE  
46  
47 version 4.1 (both from Mario Roederer, Vaccine Research Center, NIAID, NIH,  
48  
49 USA).

50  
51  
52 Real-time quantitative PCR (qPCR) was used to determine the proportion of HIV-  
53  
54 infected Ag85A-specific CD4+ T cells; resting memory CD4+ T cells (non-Ag85A-  
55  
56 specific) and CMV-specific CD4+ T cells were used as intra-individual controls.  
57  
58  
59  
60

1  
2  
3 HIV-1 gag proviral DNA within sorted CD4+ T cell populations was quantified by  
4 qPCR, as described previously<sup>20</sup>. qPCR was performed simultaneously for albumin  
5 gene copy number in all sorted CD4+ T cell populations to quantify cell number in  
6 each reaction. HIV-1 gag primers for qPCR: Gag clade B primer position and  
7 sequence were 795gagB-F: ggtgcgagagcgtcagtattaag, 911gagB-R:  
8 agtcacctgctgcccata, and probe was 841gagB-P: FAM-aaaattcgggtaaggccagggggaagaa-  
9 QSY7 (MegaBases). Gag clade C primer position and sequence were 689gagC-F:  
10 ggggaagtgaYatagcagga, 841gagC-R: ggYccttgtYttatgtccaa, and probe was 710gagC-  
11 P: ctactagtaVccttcaRgaacaRataRcatggatga. Albumin primer sequences were Alb-F:  
12 tgcattgagaaaacgccagtaa, Alb-R: atggcgcctgttcaccaa, and probe: Alb-P: FAM-  
13 tgacagagtcaccaaattgctgcacagaa-QSY7. Degenerate HIV gag clade A/G primer position  
14 and sequence were 783gagA/G-F: 5'-gagagagatgggtgcgagagcgtc-3'  
15 (GAGAGAGATGGGTGCGAGAGCGTC), 895gagA/G-R: 5'-  
16 cttccagctcctgctgccc-3', and probe was 844gagA/G-P: 5'-  
17 attcgggtaaggccagggggaagaaaaaat-3'.

18  
19  
20  
21  
22  
23  
24  
25  
26  
27  
28  
29  
30  
31  
32  
33  
34  
35  
36  
37  
38  
39  
40  
41  
42  
43 CD4+ T cells from 12 subjects (4/10 in the low-dose group and 8/10 in the high-dose  
44 group) were analysed for HIV gag content; low sort yields (less than 250 antigen-  
45 specific CD4+T cells) prevented similar analyses in the remaining 8 subjects.

46  
47  
48  
49  
50 Serum levels of MIP-1 $\alpha$ , MIP-1 $\beta$ , RANTES, TNF- $\alpha$  and IL-2 were measured pre-  
51 vaccination and at weeks one, two and 24 post-vaccination using FlowCytomix  
52 simplex kits (Bender MedSystems). Serum was thawed and plated out in duplicate in  
53 round-bottom 96-well plates. Samples were used neat for MIP-1 $\alpha$ , MIP-1 $\beta$ , TNF- $\alpha$   
54 and IL-2, and diluted 1/10 for RANTES. Standards (provided) were reconstituted as  
55  
56  
57  
58  
59  
60



1  
2  
3 specified, and 1/3 serial dilutions plated in duplicate. Bead and biotin-conjugate  
4 cocktails were added to each well in 25µL and 50µL volumes, respectively, and  
5  
6 incubated for two hours in the dark at room temperature. Samples were then washed  
7  
8 twice in 100µL Assay Buffer. Streptavidin-PE (50µL) and Assay Buffer (100µL) were  
9  
10 added and plates were incubated for one hour in the dark at room temperature.  
11  
12 Samples were then washed again and transferred to cluster tubes in 4%  
13  
14 paraformaldehyde in PBS (400uL) and acquired using an LSRII flow cytometer (BD  
15  
16 Biosciences) set up with the beads provided and the highest concentration standard;  
17  
18 the stopping gate was set so that at least 300 events were collected for each sample.  
19  
20 Data were analysed using FlowCytomixPro software (Bender MedSystems).  
21  
22  
23  
24  
25  
26  
27  
28  
29

### 30 **Statistical analysis**

31  
32 Continuous outcomes were presented as a median (range) for each group. Median  
33  
34 difference was calculated to assess difference between two groups and the  
35  
36 corresponding 95% confidence interval was computed using the robust method  
37  
38 proposed by Newson<sup>21</sup>. The overall magnitude of vaccine-induced CD4+ T cell  
39  
40 responses over the 24 weeks was summarised using area under the curve (AUC) for  
41  
42 each dose group. Peak (1 week) and plateau (24 weeks) CD4+ T cell responses were  
43  
44 compared with those at baseline (pre-vaccination) using the Wilcoxon signed rank  
45  
46 test, Stata Statistical Software, Release 9.0. 2005 (Stata Corporation, College Station,  
47  
48 TX). Mann-Whitney U test was used to compare between the vaccine groups.  
49  
50  
51 Comparisons between specific time points in this trial and previously published trials  
52  
53 of MVA85A<sup>6, 22</sup>, and between low and high dose groups were conducted using the  
54  
55  
56  
57  
58 Mann-Whitney U test (Stata).  
59  
60

1  
2  
3  
4  
5  
6  
7  
8  
9  
10  
11  
12  
13  
14  
15  
16  
17  
18  
19  
20  
21  
22  
23  
24  
25  
26  
27  
28  
29  
30  
31  
32  
33  
34  
35  
36  
37  
38  
39  
40  
41  
42  
43  
44  
45  
46  
47  
48  
49  
50  
51  
52  
53  
54  
55  
56  
57  
58  
59  
60

Non-parametric Spearman rank analyses were used to correlate immune assays and CD4/HIV RNA load with CD4+ T cell responses.

For peer review only

## RESULTS

Thirty-five individuals attended for screening between October 2006 and June 2009; 20 subjects were enrolled (Fig. 1, Flowchart). The demographics of the 20 participants are shown in Table 2, and were comparable across the two groups.

### Safety of MVA85A in HIV-infected subjects

Local reactions related to the MVA vaccine occur during the first week after vaccination and have been reported previously<sup>6, 7, 10</sup>. The local adverse event (AE) profile recorded in the diary cards of the HIV-infected subjects in this study was comparable to that observed in HIV-uninfected subjects<sup>6, 7, 10</sup> (Pathan et al, unpublished data), although pruritis appeared slightly higher in the HIV-infected group (Table 3a). There were no severe local reactions and most local AEs were mild.

One subject in the low dose group experienced a single episode of fever greater than 37.5 °C (documented at 38.1°C). All other subjective systemic symptoms occurred with similar frequencies in the low dose and high dose groups (Table 3b). There was one moderate systemic AE and all others were mild.

Pre-vaccination CD4 counts and HIV RNA loads for all 20 subjects over a time period of one to six years before enrolment are shown in Figure 2. These longitudinal data illustrate the levels of natural fluctuation that occur over time and represent important baseline measurements for the interpretation of these parameters post-vaccination, also shown in Figure 2, in the absence of an unvaccinated control group. No clinically significant changes in CD4 counts or HIV RNA load was seen post-vaccination.

1  
2  
3 A major concern with respect to the vaccination of HIV-infected individuals is the  
4 possibility that responding antigen-specific CD4+ T cells will act as preferential  
5 targets for HIV infection as a function of their activated status, thereby enhancing the  
6 propagation of HIV and accelerating disease progression. In this study, however, there  
7 was no evidence for preferential HIV infection of Ag85A-specific CD4+ T cells. The  
8 median number of CD4+ T cells in Ag85A-specific qPCR reactions was 73 (95% CI:  
9 15-130 CD4+ T cells). Where possible, multiple time-points throughout the  
10 vaccination course for each subject were analyzed, to determine the proportion of  
11 Ag85A-specific CD4+ T cells that were infected with HIV. Of 29 Ag85A-specific  
12 CD4+ T cell samples in total (11 subjects), only one subject showed a positive signal  
13 for HIV *gag* DNA by qPCR at two different post-vaccination timepoints (weeks 2 and  
14 8 post-vaccination; data not shown). In the 11 subjects tested, resting HIV-specific  
15 and CMV-specific memory cell populations showed a positive signal in all assays  
16 (data not shown). In addition, vaccination had no effect on levels of MIP-1 $\alpha$ , MIP-1 $\beta$ ,  
17 RANTES, TNF- $\alpha$  and IL-2 in unstimulated serum (data not shown).  
18  
19  
20  
21  
22  
23  
24  
25  
26  
27  
28  
29  
30  
31  
32  
33  
34  
35  
36  
37  
38  
39  
40

#### 41 **Immunogenicity of MVA85A in HIV-infected subjects**

42 MVA85A induced significant antigen-specific T cell responses as measured by IFN- $\gamma$   
43 ELISpot assay (Fig. 3a-d, Table 4a). In the low dose group, the frequency of IFN- $\gamma$ -  
44 secreting T cells responding to the single 85A peptide pool at week one post-  
45 vaccination, increased by a median of 393 sfc/million compared to prevaccination  
46 baseline measured on the day of screening ( $p=0.009$ ); there a significant increase  
47 remained until 24 weeks post-vaccination ( $p=0.032$ ). In the high dose group, a median  
48 increase of 502 sfc/million was apparent at week 1 post-vaccination ( $p=0.005$ ); again,  
49 this response was maintained until 24 weeks ( $p=0.048$ ). In both groups, T cell  
50  
51  
52  
53  
54  
55  
56  
57  
58  
59  
60

1  
2  
3 responses to the summed 85A peptide pools followed a similar pattern with a  
4 significant increase above baseline at week 1 (738 and 1730 sfc/million for low and  
5 high dose groups, respectively), although, the week 24 response was only maintained  
6 significantly above baseline in the high dose group (low dose  $p=0.17$ ; high dose  
7  $p=0.007$ ). There were no significant differences in the overall magnitude (i.e. AUC)  
8 of the IFN- $\gamma$  response between low and high dose groups across the follow-up period  
9 ( $p=0.29$  and  $p=0.68$  for summed and single peptide pools, respectively; data not  
10 shown). However the responder rate was higher in the high dose group with no  
11 observed non-responders (ie those subjects with no measurable vaccine induced  
12 immune response) compared with 1-2 non-responders (depending on antigen) in the  
13 low dose group. Overall, the kinetics of the Ag85A-specific T cell responses were  
14 very similar to those previously reported in similar studies of HIV-uninfected subjects  
15 <sup>6-11</sup>.

16  
17 Ag85A-specific T cell responses in the low-dose group were significantly lower  
18 compared to those observed in previously published studies of HIV-uninfected  
19 subjects (AUC analysis,  $p=0.02$ ; Table 4b)<sup>6, 22</sup>. This difference was not significant at  
20 week 1 (MWU analysis,  $p=0.12$ ), which represents the peak response, but was  
21 significant at week 24 post-vaccination (MWU analysis,  $p=0.004$ ; Table 4b, Figure  
22 3e-g). There were no significant differences in baseline (pre-vaccination) responses  
23 between the HIV-infected and HIV-uninfected groups (MWU analysis,  $p=0.85$ ;  
24 Figure 3e). Similarly, HIV-infected subjects in the high dose group exhibited  
25 significantly lower responses compared to HIV-uninfected subjects who received the  
26 same dose of MVA85A (AUC analysis,  $p=0.0001$ ; week 1 and week 24 MWU  
27 analysis,  $p = 0.0001$ ; Table 4b, Figure 4e-g). Again, baseline responses were  
28 comparable ( $p=0.24$ ) (Fig. 3e).

1  
2  
3 There was no significant correlation between the CD4 count at screening and the peak  
4 summed 85A peptide pool response ( $R=0.04$ ,  $p=0.09$ ), nor between HIV RNA load at  
5 screening and the peak immune response ( $R= -0.04$ ,  $p=0.08$ ). There was a strong  
6 negative correlation between viral load at screening and the plateau immune response  
7 at week 24 ( $R= -0.8$ ,  $p=0.002$ ).

8  
9  
10  
11  
12  
13  
14  
15 Four subjects were found to have LTBI. However, there were no significant post-  
16 vaccination changes in the magnitude of ESAT-6/CFP10 responses in these subjects  
17 (data not shown).

18  
19  
20  
21  
22 Ag85A-specific cytokine/chemokine production by CD4+ T cells prior to MVA85A  
23 vaccination was undetectable and increased significantly post-vaccination (Fig. 4a).  
24 One week following MVA85A vaccination, more than 40% of Ag85A-specific CD4+  
25 T cells produced IFN- $\gamma$ , IL-2, MIP-1 $\beta$  and TNF- $\alpha$  simultaneously ( $p<0.01$ ); this  
26 remained significant at week 2 ( $p<0.05$ ). By week 8 post-vaccination, 60% of Ag85A-  
27 specific CD4+ T cells were still producing IFN- $\gamma$ , IL-2 and TNF- $\alpha$  simultaneously;  
28 production of IL-2 and IFN- $\gamma$  was maintained until 24 weeks. Production of MIP-1 $\beta$   
29 was not detected beyond week 2 post-vaccination (Fig. 4a, 5a). In the first two weeks  
30 post-vaccination, Ag85A-specific CD4+ T cells exhibited similar functional profiles  
31 in the HIV-infected groups, both low dose and high dose, and the "control" low dose  
32 HIV-uninfected group; in all cases, the responses were dominated by four functionally  
33 distinct subsets (Fig. 4b, c). IFN- $\gamma$  production measured by ICS correlated closely  
34 with IFN- $\gamma$  secretion observed in the ELISpot assay ( $R= 0.75$ ,  $p<0.0001$ ,  $n=45$ ; data  
35 not shown).

36  
37  
38  
39  
40  
41  
42  
43  
44  
45  
46  
47  
48  
49  
50  
51  
52  
53  
54  
55  
56  
57  
58  
59  
60  
61  
62  
63  
64  
65  
66  
67  
68  
69  
70  
71  
72  
73  
74  
75  
76  
77  
78  
79  
80  
81  
82  
83  
84  
85  
86  
87  
88  
89  
90  
91  
92  
93  
94  
95  
96  
97  
98  
99  
100  
101  
102  
103  
104  
105  
106  
107  
108  
109  
110  
111  
112  
113  
114  
115  
116  
117  
118  
119  
120  
121  
122  
123  
124  
125  
126  
127  
128  
129  
130  
131  
132  
133  
134  
135  
136  
137  
138  
139  
140  
141  
142  
143  
144  
145  
146  
147  
148  
149  
150  
151  
152  
153  
154  
155  
156  
157  
158  
159  
160  
161  
162  
163  
164  
165  
166  
167  
168  
169  
170  
171  
172  
173  
174  
175  
176  
177  
178  
179  
180  
181  
182  
183  
184  
185  
186  
187  
188  
189  
190  
191  
192  
193  
194  
195  
196  
197  
198  
199  
200  
201  
202  
203  
204  
205  
206  
207  
208  
209  
210  
211  
212  
213  
214  
215  
216  
217  
218  
219  
220  
221  
222  
223  
224  
225  
226  
227  
228  
229  
230  
231  
232  
233  
234  
235  
236  
237  
238  
239  
240  
241  
242  
243  
244  
245  
246  
247  
248  
249  
250  
251  
252  
253  
254  
255  
256  
257  
258  
259  
260  
261  
262  
263  
264  
265  
266  
267  
268  
269  
270  
271  
272  
273  
274  
275  
276  
277  
278  
279  
280  
281  
282  
283  
284  
285  
286  
287  
288  
289  
290  
291  
292  
293  
294  
295  
296  
297  
298  
299  
300  
301  
302  
303  
304  
305  
306  
307  
308  
309  
310  
311  
312  
313  
314  
315  
316  
317  
318  
319  
320  
321  
322  
323  
324  
325  
326  
327  
328  
329  
330  
331  
332  
333  
334  
335  
336  
337  
338  
339  
340  
341  
342  
343  
344  
345  
346  
347  
348  
349  
350  
351  
352  
353  
354  
355  
356  
357  
358  
359  
360  
361  
362  
363  
364  
365  
366  
367  
368  
369  
370  
371  
372  
373  
374  
375  
376  
377  
378  
379  
380  
381  
382  
383  
384  
385  
386  
387  
388  
389  
390  
391  
392  
393  
394  
395  
396  
397  
398  
399  
400  
401  
402  
403  
404  
405  
406  
407  
408  
409  
410  
411  
412  
413  
414  
415  
416  
417  
418  
419  
420  
421  
422  
423  
424  
425  
426  
427  
428  
429  
430  
431  
432  
433  
434  
435  
436  
437  
438  
439  
440  
441  
442  
443  
444  
445  
446  
447  
448  
449  
450  
451  
452  
453  
454  
455  
456  
457  
458  
459  
460  
461  
462  
463  
464  
465  
466  
467  
468  
469  
470  
471  
472  
473  
474  
475  
476  
477  
478  
479  
480  
481  
482  
483  
484  
485  
486  
487  
488  
489  
490  
491  
492  
493  
494  
495  
496  
497  
498  
499  
500  
501  
502  
503  
504  
505  
506  
507  
508  
509  
510  
511  
512  
513  
514  
515  
516  
517  
518  
519  
520  
521  
522  
523  
524  
525  
526  
527  
528  
529  
530  
531  
532  
533  
534  
535  
536  
537  
538  
539  
540  
541  
542  
543  
544  
545  
546  
547  
548  
549  
550  
551  
552  
553  
554  
555  
556  
557  
558  
559  
560  
561  
562  
563  
564  
565  
566  
567  
568  
569  
570  
571  
572  
573  
574  
575  
576  
577  
578  
579  
580  
581  
582  
583  
584  
585  
586  
587  
588  
589  
590  
591  
592  
593  
594  
595  
596  
597  
598  
599  
600  
601  
602  
603  
604  
605  
606  
607  
608  
609  
610  
611  
612  
613  
614  
615  
616  
617  
618  
619  
620  
621  
622  
623  
624  
625  
626  
627  
628  
629  
630  
631  
632  
633  
634  
635  
636  
637  
638  
639  
640  
641  
642  
643  
644  
645  
646  
647  
648  
649  
650  
651  
652  
653  
654  
655  
656  
657  
658  
659  
660  
661  
662  
663  
664  
665  
666  
667  
668  
669  
670  
671  
672  
673  
674  
675  
676  
677  
678  
679  
680  
681  
682  
683  
684  
685  
686  
687  
688  
689  
690  
691  
692  
693  
694  
695  
696  
697  
698  
699  
700  
701  
702  
703  
704  
705  
706  
707  
708  
709  
710  
711  
712  
713  
714  
715  
716  
717  
718  
719  
720  
721  
722  
723  
724  
725  
726  
727  
728  
729  
730  
731  
732  
733  
734  
735  
736  
737  
738  
739  
740  
741  
742  
743  
744  
745  
746  
747  
748  
749  
750  
751  
752  
753  
754  
755  
756  
757  
758  
759  
760  
761  
762  
763  
764  
765  
766  
767  
768  
769  
770  
771  
772  
773  
774  
775  
776  
777  
778  
779  
780  
781  
782  
783  
784  
785  
786  
787  
788  
789  
790  
791  
792  
793  
794  
795  
796  
797  
798  
799  
800  
801  
802  
803  
804  
805  
806  
807  
808  
809  
810  
811  
812  
813  
814  
815  
816  
817  
818  
819  
820  
821  
822  
823  
824  
825  
826  
827  
828  
829  
830  
831  
832  
833  
834  
835  
836  
837  
838  
839  
840  
841  
842  
843  
844  
845  
846  
847  
848  
849  
850  
851  
852  
853  
854  
855  
856  
857  
858  
859  
860  
861  
862  
863  
864  
865  
866  
867  
868  
869  
870  
871  
872  
873  
874  
875  
876  
877  
878  
879  
880  
881  
882  
883  
884  
885  
886  
887  
888  
889  
890  
891  
892  
893  
894  
895  
896  
897  
898  
899  
900  
901  
902  
903  
904  
905  
906  
907  
908  
909  
910  
911  
912  
913  
914  
915  
916  
917  
918  
919  
920  
921  
922  
923  
924  
925  
926  
927  
928  
929  
930  
931  
932  
933  
934  
935  
936  
937  
938  
939  
940  
941  
942  
943  
944  
945  
946  
947  
948  
949  
950  
951  
952  
953  
954  
955  
956  
957  
958  
959  
960  
961  
962  
963  
964  
965  
966  
967  
968  
969  
970  
971  
972  
973  
974  
975  
976  
977  
978  
979  
980  
981  
982  
983  
984  
985  
986  
987  
988  
989  
990  
991  
992  
993  
994  
995  
996  
997  
998  
999  
1000

Surface expression of the HIV M-tropic co-receptor CCR5 was monitored throughout the course of vaccination (Fig. 5). At week 1 post-vaccination, the MFI for CCR5 was highest in the activated Ag85A-specific CD4+ T cells, and lowest in the naïve CD4+

1  
2  
3 T cell subsets. Using the integrated MFI (iMFI) function calculated using both MFI  
4 and cell frequencies, expression of CCR5 was highest in the much larger memory  
5  
6  
7  
8 CD4+ T cell pool (Fig. 5d). No significant increase in CCR5 expression was detected  
9  
10 in either the memory (Fig. 5e) or the total (Fig. 5f) CD4+ T cell populations as a  
11  
12 result of MVA85A vaccination.  
13  
14  
15  
16  
17  
18  
19  
20  
21  
22  
23  
24  
25  
26  
27  
28  
29  
30  
31  
32  
33  
34  
35  
36  
37  
38  
39  
40  
41  
42  
43  
44  
45  
46  
47  
48  
49  
50  
51  
52  
53  
54  
55  
56  
57  
58  
59  
60

For peer review only

## DISCUSSION

This is the first Phase I trial of a subunit vectored TB vaccine in HIV-infected individuals. The two main findings of this study are that MVA85A is safe in healthy subjects infected with HIV (a proportion of whom are co-infected with *M. tuberculosis*), and that MVA85A is immunogenic in this population, albeit at a lower level than in HIV-uninfected subjects. As a result of these promising findings, similar studies in South Africa (*Scriba et al, submitted*) and Senegal (*Mboup et al, unpublished data*) are ongoing.

The local and systemic AE profiles in this trial were comparable to those observed in HIV-uninfected subjects previously. Whilst we have not evaluated the safety of this vaccine in HIV-infected subjects with lower CD4 counts, we would not expect the safety profile of this vaccine to be altered by progression of HIV disease. Importantly, there were no clinically significant effects of vaccination on either CD4 count or HIV RNA load. It is important to understand the variability in these parameters during stable untreated HIV infection, to enable meaningful interpretation of fluctuations throughout the trial period. A recent quantitative review of cohort studies of HIV-infected adults suggests that, during stable untreated infection, intra-individual HIV RNA measurements can fluctuate over short periods of time by as much as 0.2-0.5 log<sub>10</sub> copies/mL, with measurement error and physiological fluctuation each contributing about 50% of this variation. CD4 counts can also vary within patients by 60-130 cells/uL within weeks, but there is less measurement error, and during stable infection the overall within-subject variation is proportionally larger for HIV RNA than for CD4 count<sup>23</sup>. In this study, we also observed greater intra-individual variations in HIV RNA load compared to CD4 counts. Only one subject in



1  
2  
3 each group demonstrated a more than 0.5 log rise in HIV RNA load at week 24 post-  
4 vaccination. The first of these (low dose group, 008) had displayed a relatively high  
5 baseline HIV RNA load and low baseline CD4 count at screening, just within the  
6 inclusion criteria. As the rise in HIV RNA load was only detectable 24 weeks after  
7 vaccination, it was considered highly unlikely that this was due to MVA85A  
8 vaccination. This subject commenced ARVs before week 24; all other subjects  
9 remained ARV-free throughout the trial period. The second subject (high dose group,  
10 035) developed a rise in HIV RNA load between week 12 and week 24, peaking at  
11 just greater than a 0.5 log increase over baseline. However, this subject's HIV RNA  
12 load had been stable prior to this, so it was again deemed unlikely that this was a  
13 vaccination-related effect. Other fluctuations in the HIV RNA loads were observed,  
14 but any sustained rise was well within the expected 0.5 log variation.  
15  
16  
17  
18  
19  
20  
21  
22  
23  
24  
25  
26  
27  
28  
29  
30

31 HIV preferentially infects memory CD4+ T cells<sup>24, 25</sup>, in particular HIV-specific  
32 memory CD4+ T cells,<sup>20</sup> and other activated antigen-specific CD4+ T cells<sup>26</sup>. Using  
33 a sensitive qPCR method, we detected HIV *gag* DNA in Ag85A-specific CD4+ T  
34 cells from only 1/11 subjects post-vaccination (3 low dose and 8 high dose). This  
35 subject received high-dose MVA85A vaccination. This low positivity rate concurs  
36 with the stable CD4 count and HIV RNA load parameters in most subjects throughout  
37 the trial. Although the qPCR assay is sensitive, the low yield of Ag85A-specific  
38 CD4+ T cells entering the assay is an important limitation and provides just a  
39 snapshot of the HIV burden within the Ag85A-specific CD4+ T cell pool and  
40 warrants further future investigation. However, whilst small effects of MVA85A on  
41 HIV infection of CD4+ target cells cannot be excluded given the small sample size,  
42 these data suggest that MVA85A vaccination of healthy HIV-infected individuals  
43 does not lead to widespread preferential infection and depletion of vaccine-induced  
44  
45  
46  
47  
48  
49  
50  
51  
52  
53  
54  
55  
56  
57  
58  
59  
60

1  
2  
3 CD4+ T cell populations in the periphery. These data are supported by no change in  
4  
5 surface expression of the HIV co-receptor CCR5 following MVA85A vaccination. In  
6  
7 addition, the lack of effect of vaccination on chemokine and cytokine levels in  
8  
9 unstimulated serum supports the interpretation that vaccination with MVA85A did not  
10  
11 lead to widespread immune activation in this subject group.  
12  
13  
14

15  
16  
17 We have shown that vaccine-induced immunogenicity, while of moderate magnitude,  
18  
19 is significantly lower than in healthy HIV-uninfected subjects given the same dose of  
20  
21 MVA85A. Thus, additional strategies may be required to augment immune responses  
22  
23 to MVA85A vaccination in the context of HIV infection. Partial reconstitution of the  
24  
25 immune system with ARVs may improve the response to vaccination. Indeed, this  
26  
27 study shows that the baseline HIV RNA level is a strong negative predictor of  
28  
29 summed 85A peptide pool responses at week 24 post-vaccination. In addition, a  
30  
31 booster vaccination with MVA85A may be required to enhance the vaccine-induced  
32  
33 immune response.  
34  
35  
36  
37  
38  
39  
40

41 The functional profile of Ag85A-specific CD4+ T cells observed in this study was  
42  
43 remarkably comparable to that of healthy HIV-uninfected subjects<sup>19</sup> and *M.*  
44  
45 *tuberculosis*-infected subjects<sup>10</sup>, although the response in HIV-infected subjects is  
46  
47 less durable. IFN- $\gamma$  and TNF- $\alpha$  are known to be important for protective immunity to  
48  
49 TB, and these cytokines dominated the MVA85A vaccine-induced CD4+ T cell  
50  
51 response elicited in the current study cohort. In this study, production of MIP-1 $\beta$  by  
52  
53 Ag85A-specific CD4+ T cells was not detectable after week 2 post-vaccination. The  
54  
55 production of multiple cytokines including IL-2 and MIP-1 $\beta$  by HIV-specific CD8+ T  
56  
57 cells is associated with long-term non-progression, albeit with uncertain causality<sup>27</sup>.  
58  
59  
60

1  
2  
3 The production of  $\beta$ -chemokines by CD8+ T cells was not assessed here as there were  
4  
5 no detectable Ag-85A specific CD8+ T cell responses pre- or post-vaccination.  
6  
7  
8  
9

10  
11 Vaccine-induced bystander activation of CD4+ T cells in HIV-infected subjects is  
12 likely to be undesirable because activated CD4+ T cells are at increased risk of HIV  
13 infection. The overall pattern of cytokine production and the frequency of CMV-  
14 specific CD4+ T cell producing cytokines remained both relatively stable over the 24-  
15 week period following MVA85A vaccination, and comparable to pre-vaccination  
16 responses (Supplemental Figure 1). These data suggest that MVA85A vaccination  
17 does not induce substantial bystander activation of antigen-specific CD4+ T cell  
18 populations.  
19  
20  
21  
22  
23  
24  
25  
26  
27  
28  
29  
30  
31

32 Demonstrating the safety and immunogenicity of a new TB vaccine in an important  
33 target population is a crucial step, but does not mean that the vaccine will be effective.  
34 However, the data presented here support further safety and immunogenicity studies  
35 of this candidate vaccine, together with proof-of-concept efficacy trials, in TB and  
36 HIV endemic areas.  
37  
38  
39  
40  
41  
42  
43  
44  
45  
46  
47  
48  
49  
50  
51  
52  
53  
54  
55  
56  
57  
58  
59  
60

**Authors' Contributions:****Authors' Contributions:**

Concept and design of study, and obtaining funding: HMcS.

Protocol writing: HMcS, CRS, AMM, AML.

Recruitment, vaccination and follow-up of volunteers: AMM, RR, IDP, MH, AW, JR, JS, GR.

Immunology assays and analysis: AAP, NERB, IS, SH, HAF, HP.

Collaboration and contribution of reagents/materials/analysis tools: DRA, DAP, JPC, DCD, RAK, MR.

Data analysis: AMM, RR, AAP, NA, NERB, HMcS.

Writing of the paper: AMM, HMcS, with contributions from all authors.

**Conflict of Interest Statement:** AAP and HMcS are named inventors on a composition of matter patent for MVA85A owned by the University of Oxford, and are shareholders in a Joint Venture formed for the further development of this vaccine.

**Acknowledgements:**

We thank Dr Janet Scott and the clinical research nurses in Oxford, at St. Mary's Hospital in London and at Selly Oak Hospital in Birmingham, especially Kenneth Legg and Jan Harding, for their invaluable assistance in identification, recruitment and follow-up of eligible subjects. We also thank Professor Adrian Hill for discussions. Oxford University was the sponsor for this clinical trial. HMcS is a Wellcome Trust Senior Clinical Research Fellow and a Jenner Institute Investigator. DAP is a Medical Research Council Senior Clinical Fellow.

## REFERENCES

1. Dye C, Lonnroth K, Jaramillo E, Williams BG, Raviglione M. Trends in tuberculosis incidence and their determinants in 134 countries. *Bull World Health Organ.* 2009; **87**(9): 683-91.
2. World Health Organization, "Global Tuberculosis Control: A Short Update To The 2009 Report" WHO. 2009: 6-32.
3. Matteelli A, Migliori GB, Cirillo D, Centis R, Girard E, Raviglione M. Multidrug-resistant and extensively drug-resistant Mycobacterium tuberculosis: epidemiology and control. *Expert Rev Anti Infect Ther.* 2007; **5**(5): 857-71.
4. Colditz GA, Brewer TF, Berkey CS, Wilson ME, Burdick E, Fineberg HV, et al. Efficacy of BCG vaccine in the prevention of tuberculosis. Meta-analysis of the published literature. *JAMA.* 1994; **271**(9): 698-702.
5. Minassian A. Tuberculosis vaccines: present and future. *Expert Reviews in Respiratory Medicine.* 2008; **2**(6): 721-38.
6. McShane H, Pathan AA, Sander CR, Keating SM, Gilbert SC, Huygen K, et al. Recombinant modified vaccinia virus Ankara expressing antigen 85A boosts BCG-primed and naturally acquired antimycobacterial immunity in humans. *Nat Med.* 2004; **10**(11): 1240-4.
7. Pathan AA, Sander CR, Fletcher HA, Poulton I, Alder NC, Beveridge NE, et al. Boosting BCG with recombinant modified vaccinia ankara expressing antigen 85A: different boosting intervals and implications for efficacy trials. *PLoS One.* 2007; **2**(10): e1052.
8. Hawkrigde T, Scriba TJ, Gelderbloem S, Smit E, Tameris M, Moyo S, et al. Safety and immunogenicity of a new tuberculosis vaccine, MVA85A, in healthy adults in South Africa. *J Infect Dis.* 2008; **198**(4): 544-52.
9. Brookes RH, Hill PC, Owiafe PK, Ibanga HB, Jeffries DJ, Donkor SA, et al. Safety and immunogenicity of the candidate tuberculosis vaccine MVA85A in West Africa. *PLoS One.* 2008; **3**(8): e2921.
10. Sander CR, Pathan AA, Beveridge NE, Poulton I, Minassian A, Alder N, et al. Safety and immunogenicity of a new tuberculosis vaccine, MVA85A, in Mycobacterium tuberculosis-infected individuals. *Am J Respir Crit Care Med.* 2009; **179**(8): 724-33.
11. Scriba TJ, Tameris M, Mansoor N, Smit E, van der Merwe L, Isaacs F, et al. Modified vaccinia Ankara-expressing Ag85A, a novel tuberculosis vaccine, is safe in adolescents and children, and induces polyfunctional CD4+ T cells. *Eur J Immunol.* **40**(1): 279-90.
12. Carroll MW, Moss B. Host range and cytopathogenicity of the highly attenuated MVA strain of vaccinia virus: propagation and generation of recombinant viruses in a nonhuman mammalian cell line. *Virology.* 1997; **238**(2): 198-211.
13. Meyer H, Sutter G, Mayr A. Mapping of deletions in the genome of the highly attenuated vaccinia virus MVA and their influence on virulence. *J Gen Virol.* 1991; **72 ( Pt 5)**: 1031-8.
14. Cosma A, Nagaraj R, Buhler S, Hinkula J, Busch DH, Sutter G, et al. Therapeutic vaccination with MVA-HIV-1 nef elicits Nef-specific T-helper cell responses in chronically HIV-1 infected individuals. *Vaccine.* 2003; **22**(1): 21-9.
15. Harrer E, Bauerle M, Ferstl B, Chaplin P, Petzold B, Mateo L, et al. Therapeutic vaccination of HIV-1-infected patients on HAART with a recombinant HIV-1 nef-expressing MVA: safety, immunogenicity and influence on viral load during treatment interruption. *Antivir Ther.* 2005; **10**(2): 285-300.

16. Dorrell L, Williams P, Suttill A, Brown D, Roberts J, Conlon C, et al. Safety and tolerability of recombinant modified vaccinia virus Ankara expressing an HIV-1 gag/multiepitope immunogen (MVA.HIVA) in HIV-1-infected persons receiving combination antiretroviral therapy. *Vaccine*. 2007; **25**(17): 3277-83.
17. Bejon P, Peshu N, Gilbert SC, Lowe BS, Molyneux CS, Forsdyke J, et al. Safety profile of the viral vectors of attenuated fowlpox strain FP9 and modified vaccinia virus Ankara recombinant for either of 2 preerythrocytic malaria antigens, ME-TRAP or the circumsporozoite protein, in children and adults in Kenya. *Clin Infect Dis*. 2006; **42**(8): 1102-10.
18. Stittelaar KJ, Kuiken T, de Swart RL, van Amerongen G, Vos HW, Niesters HG, et al. Safety of modified vaccinia virus Ankara (MVA) in immune-suppressed macaques. *Vaccine*. 2001; **19**(27): 3700-9.
19. Beveridge NE, Price DA, Casazza JP, Pathan AA, Sander CR, Asher TE, et al. Immunisation with BCG and recombinant MVA85A induces long-lasting, polyfunctional Mycobacterium tuberculosis-specific CD4+ memory T lymphocyte populations. *Eur J Immunol*. 2007; **37**(11): 3089-100.
20. Douek DC, Brenchley JM, Betts MR, Ambrozak DR, Hill BJ, Okamoto Y, et al. HIV preferentially infects HIV-specific CD4+ T cells. *Nature*. 2002; **417**(6884): 95-8.
21. Newson R. Parameters behind “non-parametric” statistics: Kendal Tau, Somers’D and median differences. *The Stata Journal*. 2002; **2**(1):. 45-64.
22. Beveridge NE, Fletcher HA, Hughes J, Pathan AA, Scriba TJ, Minassian A, et al. A comparison of IFN $\gamma$  detection methods used in tuberculosis vaccine trials. *Tuberculosis (Edinb)*. 2008; **88**(6): 631-40.
23. Korenromp EL, Williams BG, Schmid GP, Dye C. Clinical prognostic value of RNA viral load and CD4 cell counts during untreated HIV-1 infection--a quantitative review. *PLoS One*. 2009; **4**(6): e5950.
24. Schnittman SM, Lane HC, Greenhouse J, Justement JS, Baseler M, Fauci AS. Preferential infection of CD4+ memory T cells by human immunodeficiency virus type 1: evidence for a role in the selective T-cell functional defects observed in infected individuals. *Proc Natl Acad Sci U S A*. 1990; **87**(16): 6058-62.
25. Brenchley JM, Hill BJ, Ambrozak DR, Price DA, Guenaga FJ, Casazza JP, et al. T-cell subsets that harbor human immunodeficiency virus (HIV) in vivo: implications for HIV pathogenesis. *J Virol*. 2004; **78**(3): 1160-8.
26. Lore K, Smed-Sorensen A, Vasudevan J, Mascola JR, Koup RA. Myeloid and plasmacytoid dendritic cells transfer HIV-1 preferentially to antigen-specific CD4+ T cells. *J Exp Med*. 2005; **201**(12): 2023-33.
27. Casazza JP, Brenchley JM, Hill BJ, Ayana R, Ambrozak D, Roederer M, et al. Autocrine production of beta-chemokines protects CMV-Specific CD4 T cells from HIV infection. *PLoS Pathog*. 2009; **5**(10): e1000646.

1  
2  
3  
4  
5  
6  
7  
8  
9  
10  
11  
12  
13  
14  
15  
16  
17  
18  
19  
20  
21  
22  
23  
24  
25  
26  
27  
28  
29  
30  
31  
32  
33  
34  
35  
36  
37  
38  
39  
40  
41  
42  
43  
44  
45  
46  
47  
48  
49  
50  
51  
52  
53  
54  
55  
56  
57  
58  
59  
60

## TABLE and FIGURE LEGENDS

**Table 1** *Full inclusion and exclusion criteria.* Subjects were required to meet all of the inclusion criteria to participate in the study:

**Table 2** *Subject demographics:* Comparison of low and high dose vaccination groups.

**Tables 3a and b** *Local and systemic adverse events:* Comparison of low and high dose vaccination groups with dose-matched HIV-uninfected subjects from previous trials of MVA85A<sup>6, 7, 10</sup> (Pathan et al, unpublished data). There were significantly fewer systemic AEs per person, (and a lower frequency of systemic AEs overall,) in the 10 HIV-infected subjects receiving high dose MVA85A compared with HIV-uninfected subjects receiving the same dose of vaccine ( $p=0.026$ , data not shown and Pathan *et al*, unpublished)

**Table 4a** *Ex-vivo IFN- $\gamma$  ELISpot statistics (1):* Comparison of screening, week 1 and week 24 responses within low and high dose groups, for both summed and single pooled peptides, using Wilcoxon signed rank test. Median (range), median difference (range, of week 1 and week 24 responses compared to screening,) and  $p$ -values are shown.

**Table 4b** *Ex-vivo IFN- $\gamma$  ELISpot statistics (2):* Comparison of responses between HIV-infected and HIV-uninfected subjects, at each time-point and each vaccine dose,

1  
2  
3 using Mann-Whitney U test. Median (range), difference in medians (with 95%  
4 confidence intervals), and *p*-values are shown. AUC analysis is also shown.  
5  
6  
7  
8  
9

10 **Figure 1 Flowchart.** Follow-up was conducted for 24 weeks post-vaccination in both  
11 the low dose MVA85A ( $5 \times 10^7$  pfu; left panels) and high dose MVA85A ( $1 \times 10^8$  pfu;  
12 right panels) groups. Of the volunteers excluded at screening, 5/15 had CD4 counts  
13  $< 350 \times 10^6/L$  and/or exhibited progressively decreasing CD4 counts, 2/15 had HIV  
14 RNA loads of  $> 100,000$  copies/mL, 2/15 had abnormal chest radiographs, 1/15 had a  
15 current history of active eczema, and 1/15 had a history of illicit drug usage and  
16 unstable depression; the remaining 4/15 were eligible but failed to attend for  
17 vaccination (2 in each dose group).  
18  
19  
20  
21  
22  
23  
24  
25  
26  
27  
28  
29  
30  
31

32 **Figure 2 (a-d) Comparison of pre and post-vaccination CD4 counts:** Longitudinal  
33 CD4 counts of subjects in the low dose ( $5 \times 10^7$  pfu MVA85A) group pre-vaccination,  
34 (a); and high dose ( $1 \times 10^8$  pfu MVA85A) group (c) pre-vaccination. Longitudinal CD4  
35 counts post-vaccination (up to 24 weeks) in the low dose (b) and high dose (d)  
36 groups. NB X-axis for the pre-vaccination data is not standardised for time but varies  
37 from 1-6 years depending on the individual subject. (e-h) *Comparison of pre and post-*  
38 *vaccination HIV RNA loads:* Longitudinal HIV RNA loads of subjects in the low dose  
39 (e) and high dose (g) groups pre-vaccination. Longitudinal HIV RNA loads post-  
40 vaccination (up to 24 weeks) in the low dose (f) and high dose (h) groups.  
41 Anonymous number codes (001-036) shown in key. NB X-axis for the pre-  
42 vaccination data is not standardised for time but varies from 1-6 years depending on  
43 the individual subject.  
44  
45  
46  
47  
48  
49  
50  
51  
52  
53  
54  
55  
56  
57  
58  
59  
60



1  
2  
3 **Figure 3 (a-d)** *IFN- $\gamma$  ELISpot responses in the low dose and high dose groups.*  
4  
5 *Longitudinal responses to the single 85A peptide pool are shown for the low dose*  
6 *( $5 \times 10^7$  pfu MVA85A) group, (a) and high dose ( $1 \times 10^8$  pfu MVA85A) group (b).*  
7  
8  
9  
10 *Longitudinal responses to the summed 85A peptide pools are shown for the low dose*  
11 *(c) and high dose (d) groups. Horizontal bars represent the median response.*

12  
13  
14  
15 *Comparison of IFN- $\gamma$  ELISpot responses in HIV-infected and HIV-uninfected subjects*  
16 *(e-g). Responses to summed 85A peptide pools for low dose and high dose vaccine*  
17 *regimes at screening (e); week 1 post-vaccination (f) and week 24 post-vaccination*  
18 *(g). Subjects with LTBI are denoted with grey symbols. Statistically significant*  
19 *differences in the responses between HIV-infected and HIV-uninfected subjects were*  
20 *assessed using the Mann-Whitney U test. \* $p < 0.05$ ; \*\* $p < 0.01$ ; \*\*\* $p < 0.001$ . Horizontal*  
21 *bars represent the median response<sup>6, 7, 10</sup> (Pathan et al, unpublished data).*  
22  
23  
24  
25  
26  
27  
28  
29  
30  
31  
32  
33

34 **Figure 4** *MVA85A induces polyfunctional Ag85A-specific CD4+ T cells in HIV-*  
35 *infected individuals. MVA85A vaccination-induced production of IFN- $\gamma$ , IL-2, MIP-*  
36 *1 $\beta$  and TNF- $\alpha$  by antigen-specific CD4+ T cells was assessed following Ag85A*  
37 *peptide stimulation of cryopreserved PBMC using polychromatic flow cytometry. (a)*  
38 *Individual data points are shown with median line, interquartile range (open bars) and*  
39 *range (whiskers) at baseline and at each time-point post-vaccination for every*  
40 *possible combination of cytokine/chemokine production. High dose and low dose*  
41 *groups were analyzed together (n=17). (b) The functional profile of the Ag85A-*  
42 *specific CD4+ T cell response is summarized in the pie charts (n=17). CD4+ T cells*  
43 *producing a given number of cytokines/chemokines are grouped and colour-coded*  
44 *together. Pie charts are shown for the high dose HIV-infected group (n=9), the low*  
45 *dose HIV-infected group (n=8) and low dose healthy controls (n=6). (c) Absolute*  
46  
47  
48  
49  
50  
51  
52  
53  
54  
55  
56  
57  
58  
59  
60

1  
2  
3 percentages of the highest frequency CD4+ T cell subsets producing specific  
4 combinations of chemokine/cytokines at week 1 post-vaccination across the different  
5  
6  
7  
8 groups; \*  $p < 0.05$ , \*\*  $p < 0.01$ .  
9

10  
11  
12 **Figure 5** *Cytokine/chemokine production and receptor expression*  
13

14  
15 (a) Absolute percent of Ag85A-specific CD4+ T cells producing IL-2 or MIP-1 $\beta$  at  
16 week 1 post-MVA85A vaccination in HIV-infected subjects (low dose and high dose,  
17 n=17) versus healthy controls (n=6). Representative histogram (b) and scatter plot (c)  
18 showing CCR5 median fluorescence intensity (MFI) in naïve CD4+ T cells, memory  
19 CD4+ T cells and activated Ag85A-specific CD4+ T cells at week 1 post-  
20 vaccination (n=16 in all groups). (d) Scatter plot showing CCR5 integrated MFI  
21 (iMFI) for naïve, memory and Ag85A-specific CD4+ T cells (n=16). Line charts  
22 showing CCR5 MFI in memory CD4+ T cells (e) and the total CD4+ T cell  
23 population (f) across the MVA85A vaccination time-course (n=16). \*  $p < 0.05$ , \*\*  
24  
25  
26  
27  
28  
29  
30  
31  
32  
33  
34  
35  
36  
37  
38  
39  
40  
41  
42  
43  
44  
45  
46  
47  
48  
49  
50  
51  
52  
53  
54  
55  
56  
57  
58  
59  
60  
 $p < 0.01$ .

Table 1 Full inclusion and exclusion criteria

| Inclusion criteria                                                                                                                                                                                                                                                                                                                                                                                                                                                                      | Exclusion criteria                                                                                                                                                                                                                                                                                                                                                                                                                                                                                                                                                                                                                                                                                                                                                                                                                                                                                                                                                                                                                                                                                                                                                                                                                                                                                                                                                                                                                                                                                                                                                                                                       |
|-----------------------------------------------------------------------------------------------------------------------------------------------------------------------------------------------------------------------------------------------------------------------------------------------------------------------------------------------------------------------------------------------------------------------------------------------------------------------------------------|--------------------------------------------------------------------------------------------------------------------------------------------------------------------------------------------------------------------------------------------------------------------------------------------------------------------------------------------------------------------------------------------------------------------------------------------------------------------------------------------------------------------------------------------------------------------------------------------------------------------------------------------------------------------------------------------------------------------------------------------------------------------------------------------------------------------------------------------------------------------------------------------------------------------------------------------------------------------------------------------------------------------------------------------------------------------------------------------------------------------------------------------------------------------------------------------------------------------------------------------------------------------------------------------------------------------------------------------------------------------------------------------------------------------------------------------------------------------------------------------------------------------------------------------------------------------------------------------------------------------------|
| <ul style="list-style-type: none"> <li>• Healthy adults aged 18 to 55 years</li> <li>• Willingness to allow the investigators to discuss the volunteer's medical history with the volunteer's HIV lead physician (and GP, if appropriate)</li> <li>• HIV antibody positive; diagnosed at least 6 months previously</li> <li>• CD4 count &gt;350; nadir CD4 not &lt; 300</li> <li>• HIV viral load not &gt; 100,000 copies per millilitre</li> <li>• Written informed consent</li> </ul> | <ul style="list-style-type: none"> <li>• Any clinically significant abnormal finding on screening biochemistry or haematology blood tests or on urinalysis</li> <li>• Any ARV therapy within the past 6 months</li> <li>• Any AIDS defining illness</li> <li>• CXR showing TB or evidence of other active infection</li> <li>• Prior receipt of a recombinant MVA or Fowlpox vaccine</li> <li>• Use of any investigational or non-registered drug, live vaccine or medical device other than the study vaccine within 30 days preceding dosing of study vaccine, or planned use during the study period</li> <li>• Administration of chronic (defined as more than 14 days) immunosuppressive drugs or other immune modifying drugs within six months of vaccination. (For corticosteroids, this will mean prednisolone, or equivalent, <math>\geq 0.5</math> mg/kg/day. Inhaled and topical steroids are allowed.)</li> <li>• History of allergic disease or reactions likely to be exacerbated by any component of the vaccine, e.g. egg products</li> <li>• Presence of any underlying disease that compromises the diagnosis and evaluation of response to the vaccine (including evidence of cardiovascular disease, history of cancer (except basal cell carcinoma of the skin and cervical carcinoma in situ), history of insulin requiring diabetes mellitus, any ongoing chronic illness requiring ongoing specialist supervision (e.g., gastrointestinal), and chronic or active neurological disease)</li> <li>• History of <math>\geq 2</math> hospitalisations for invasive bacterial infections</li> </ul> |

|  |                                                                                                                                                                                                                                                                                                                                                                                                                                                                                                                                                                                                                                                                                                                                                                                                                                                                                                                                                                                                                                 |
|--|---------------------------------------------------------------------------------------------------------------------------------------------------------------------------------------------------------------------------------------------------------------------------------------------------------------------------------------------------------------------------------------------------------------------------------------------------------------------------------------------------------------------------------------------------------------------------------------------------------------------------------------------------------------------------------------------------------------------------------------------------------------------------------------------------------------------------------------------------------------------------------------------------------------------------------------------------------------------------------------------------------------------------------|
|  | <p>(pneumonia, meningitis)</p> <ul style="list-style-type: none"><li>• Suspected or known current drug and/or alcohol abuse (as defined by an alcohol intake of &gt;42 units a week)</li><li>• Seropositive for hepatitis B surface antigen (HBsAg) and/or hepatitis C (HCV antibodies)</li><li>• Evidence of serious psychiatric condition</li><li>• Any other on-going chronic illness requiring hospital specialist supervision</li><li>• Administration of immunoglobulins and/or any blood products within the three months preceding the planned administration of the vaccine candidate</li><li>• Pregnant/lactating female and any female who is willing or intends to become pregnant during the study</li><li>• Any history of anaphylaxis in reaction to vaccination</li><li>• PI assessment of lack of willingness to participate and comply with all requirements of the protocol, or identification of any factor felt to significantly increase the participant's risk of suffering an adverse outcome</li></ul> |
|--|---------------------------------------------------------------------------------------------------------------------------------------------------------------------------------------------------------------------------------------------------------------------------------------------------------------------------------------------------------------------------------------------------------------------------------------------------------------------------------------------------------------------------------------------------------------------------------------------------------------------------------------------------------------------------------------------------------------------------------------------------------------------------------------------------------------------------------------------------------------------------------------------------------------------------------------------------------------------------------------------------------------------------------|

For peer review only

1  
2  
3  
4  
5  
6  
7  
8  
9  
10  
11  
12  
13  
14  
15  
16  
17  
18  
19  
20  
21  
22  
23  
24  
25  
26  
27  
28  
29  
30  
31  
32  
33  
34  
35  
36  
37  
38  
39  
40  
41  
42  
43  
44  
45  
46  
47  
48  
49  
50  
51  
52  
53  
54  
55  
56  
57  
58  
59  
60

TABLE 2

| Demographics and screening results |               | Low dose<br>5x10 <sup>7</sup> pfu | High dose<br>1x10 <sup>8</sup> pfu |
|------------------------------------|---------------|-----------------------------------|------------------------------------|
| Sex                                | Male          | 9 (90%)                           | 8 (80%)                            |
|                                    | Female        | 1 (10%)                           | 2 (20%)                            |
| Median age (range)                 |               | 35.8 (21-52)                      | 35.1 (27-46)                       |
| Continent of Birth                 | Africa        | 4 (40%)                           | 4 (40%)                            |
|                                    | Asia          | 0                                 | 1 (10%)                            |
|                                    | Europe        | 4 (40%)                           | 5 (40%)                            |
|                                    | North America | 1 (10%)                           | 0                                  |
|                                    | South America | 1 (10%)                           | 0                                  |
| BCG                                | Definite      | 7 (70%)                           | 10 (100%)                          |
|                                    | Uncertain     | 3 (30%)                           | 0 (0%)                             |
| Latent infection (ESAT-6/CFP-10 +) |               | 2 (20%)                           | 3 (30%)                            |
| Median CD4 count (range)           |               | 570<br>(430-1200)                 | 625<br>(410-840)                   |
| Median HIV RNA load (range)        |               | 6069 (39-<br>41890)               | 14805 (49-<br>71090)               |

TABLE 3

(a)

| Local Adverse Events | HIV-infected               |                               | HIV-negative                  |                               |                               |
|----------------------|----------------------------|-------------------------------|-------------------------------|-------------------------------|-------------------------------|
|                      | Dose<br>Number of subjects | 5x10 <sup>7</sup> pfu<br>n=10 | 1x10 <sup>8</sup> pfu<br>n=10 | 5x10 <sup>7</sup> pfu<br>n=43 | 1x10 <sup>8</sup> pfu<br>n=12 |
| Redness              |                            | 10 (100%)                     | 10 (100%)                     | 42 (98%)                      | 12 (100%)                     |
| Pruritis             |                            | 10 (100%)                     | 9 (90%)                       | 22 (51%)                      | 8 (67%)                       |
| Pain                 |                            | 8 (80%)                       | 7 (70%)                       | 36 (84%)                      | 12 (100%)                     |
| Induration           |                            | 10 (100%)                     | 10 (100%)                     | 42 (98%)                      | 12 (100%)                     |

(b)

| Systemic Adverse Events            | HIV-infected               |                               | HIV-negative                  |                               |                               |
|------------------------------------|----------------------------|-------------------------------|-------------------------------|-------------------------------|-------------------------------|
|                                    | Dose<br>Number of subjects | 5x10 <sup>7</sup> pfu<br>n=10 | 1x10 <sup>8</sup> pfu<br>n=10 | 5x10 <sup>7</sup> pfu<br>n=43 | 1x10 <sup>8</sup> pfu<br>n=12 |
| Measured fever                     |                            | 1 (10%)                       | 0 (0%)                        | 3 (7%)                        | 5 (42%)                       |
| Subjective fever                   |                            | 3 (30%)                       | 2 (20%)                       | 17 (40%)                      | 9 (75%)                       |
| Arthralgia                         |                            | 2 (20%)                       | 3 (30%)                       | 6 (14%)                       | 7 (58%)                       |
| Headache                           |                            | 6 (60%)                       | 4 (40%)                       | 21 (49%)                      | 10 (83%)                      |
| Myalgia                            |                            | 1 (10%)                       | 2 (20%)                       | 18 (42%)                      | 9 (75%)                       |
| Nausea                             |                            | 1 (10%)                       | 0 (0%)                        | 4 (9%)                        | 4 (33%)                       |
| Vasovagal syncope                  |                            | 0 (0%)                        | 1 (10%)                       | 0 (0%)                        | 0 (0%)                        |
| Axillary lymphadenopathy           |                            | 1 (10%)                       | 0 (0%)                        | 2 (5%)                        | 2 (17%)                       |
| Change in haematology/biochemistry |                            | 0 (0%)                        | 0 (0%)                        | 0 (0%)                        | 0 (0%)                        |

TABLE 4

(a)  
Summed pooled peptides – within dose changes from screening to peak and plateau

| Dose |                                                   | Screening<br>(n=10) | Week 1<br>(n=10) | Week 24<br>(n=10)   |
|------|---------------------------------------------------|---------------------|------------------|---------------------|
| Low  | Median (range)                                    | 10 (3, 20)          | 738 (109, 4398)  | 20 (0, 237) n=9     |
|      | Median difference (range) (compared to screening) |                     | 730 (109, 4383)  | 17 (-8, 218)<br>n=9 |
|      | <i>p</i> -value*                                  |                     | 0.007            | 0.17                |
| High | Median (range)                                    | 3 (0, 14)           | 1730 (758, 2138) | 42 (33, 256)        |
|      | Median difference (range) (compared to screening) |                     | 1721 (743, 2135) | 42 (27, 247)        |
|      | <i>p</i> -value*                                  |                     | 0.005            | 0.007               |

\*Wilcoxon signed rank test

Single pooled peptides – within dose changes from screening to peak and plateau

| Dose |                                                   | Screening<br>(n=10) | Week 1<br>(n=10)      | Week 24<br>(n=10) |
|------|---------------------------------------------------|---------------------|-----------------------|-------------------|
| Low  | Median (range)                                    | 0 (0, 8) n=9        | 393 (67, 1275) n=9    | 13 (2, 103) n=9   |
|      | Median difference (range) (compared to screening) |                     | 393 (60, 1272)<br>n=9 | 13 (2, 97)<br>n=9 |
|      | <i>p</i> -value*                                  |                     | 0.009                 | 0.032             |
| High | Median (range)                                    | 0 (0, 8)            | 502 (312, 677)        | 14 (0, 68)        |
|      | Median difference (range) (compared to screening) |                     | 502 (294, 677)        | 14 (0, 66)        |
|      | <i>p</i> -value*                                  |                     | 0.005                 | 0.048             |

\*Wilcoxon signed rank test

(b)

## HIV-infected vs. HIV-negative group

|                      | Summed Pooled peptides | Median (range) HIV+           | Median (range) HIV-             | Difference in medians<br>(95% confidence interval) | p-value* |
|----------------------|------------------------|-------------------------------|---------------------------------|----------------------------------------------------|----------|
| Week 1               | Low dose               | 738<br>(109, 4398)<br>n=10    | 2147<br>(1173, 5085)<br>n=21    | 1101<br>(-393, 2873)                               | 0.12     |
|                      | High dose              | 1730<br>(758, 2138)<br>n=10   | 6493<br>(4854, 7312)<br>n=12    | 4557<br>(3038, 5904)                               | 0.0001   |
| Week 24              | Low dose               | 20<br>(0, 237)<br>n=9         | 385<br>(228, 1010)<br>n=20      | 339<br>(161, 534)                                  | 0.004    |
|                      | High dose              | 42<br>(33, 256)<br>n=10       | 970<br>(655, 1199)<br>n=12      | 820<br>(569, 1050)                                 | 0.0001   |
| Area under the curve | Low dose               | 2162<br>(519, 23348)<br>n=9   | 16317<br>(9129, 36418)<br>n=20  | 11884<br>(3191, 17387)                             | 0.02     |
|                      | High dose              | 5929<br>(3167, 11607)<br>n=10 | 41575<br>(26919, 53807)<br>n=12 | 31384<br>(20778, 45504)                            | 0.0001   |



Figure 1

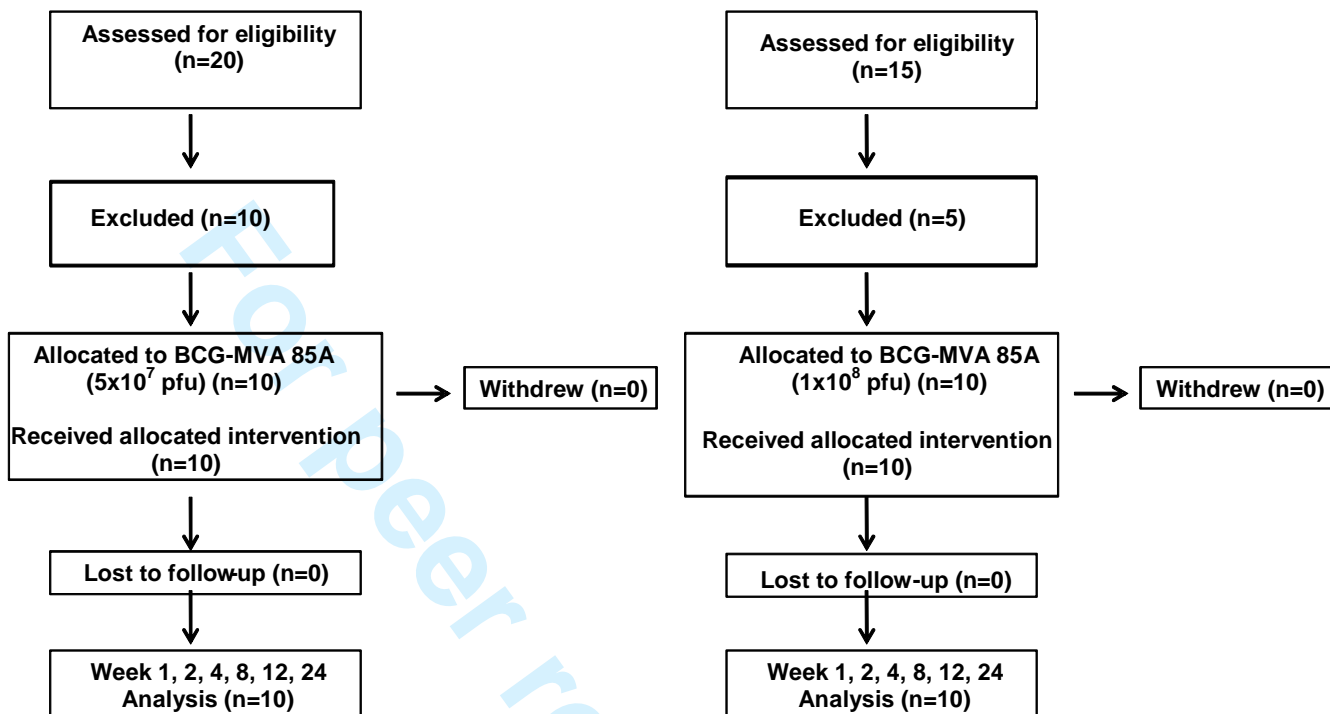



Figure 3

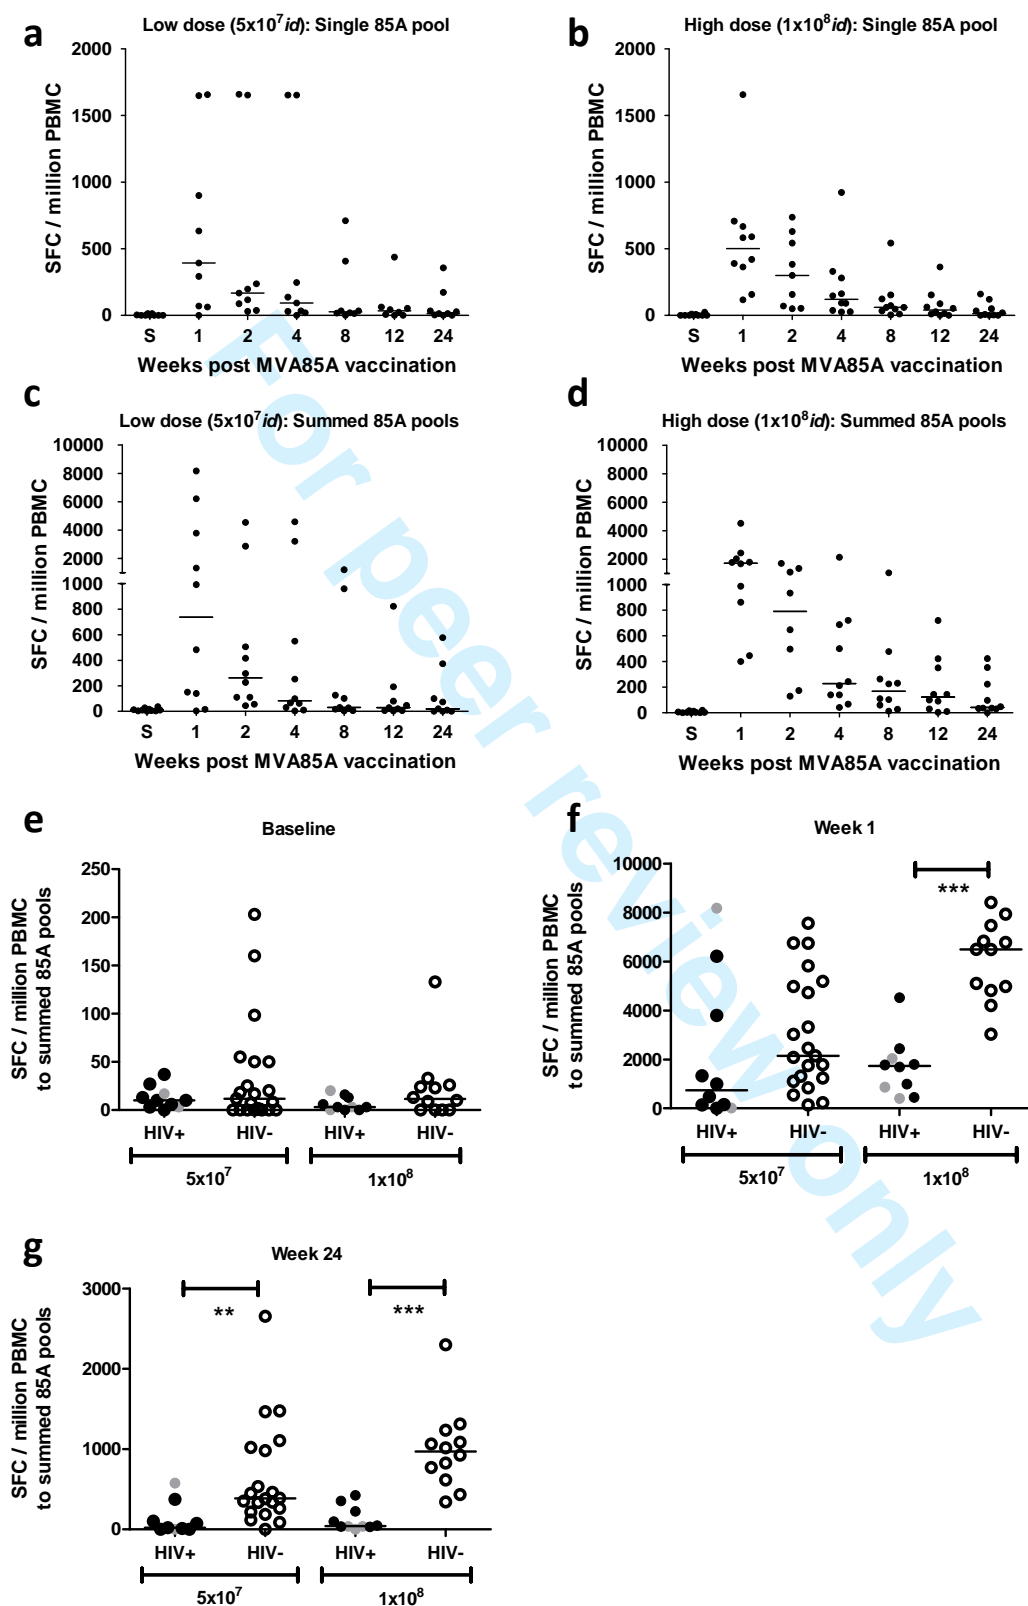

## Figure 4



Figure 5

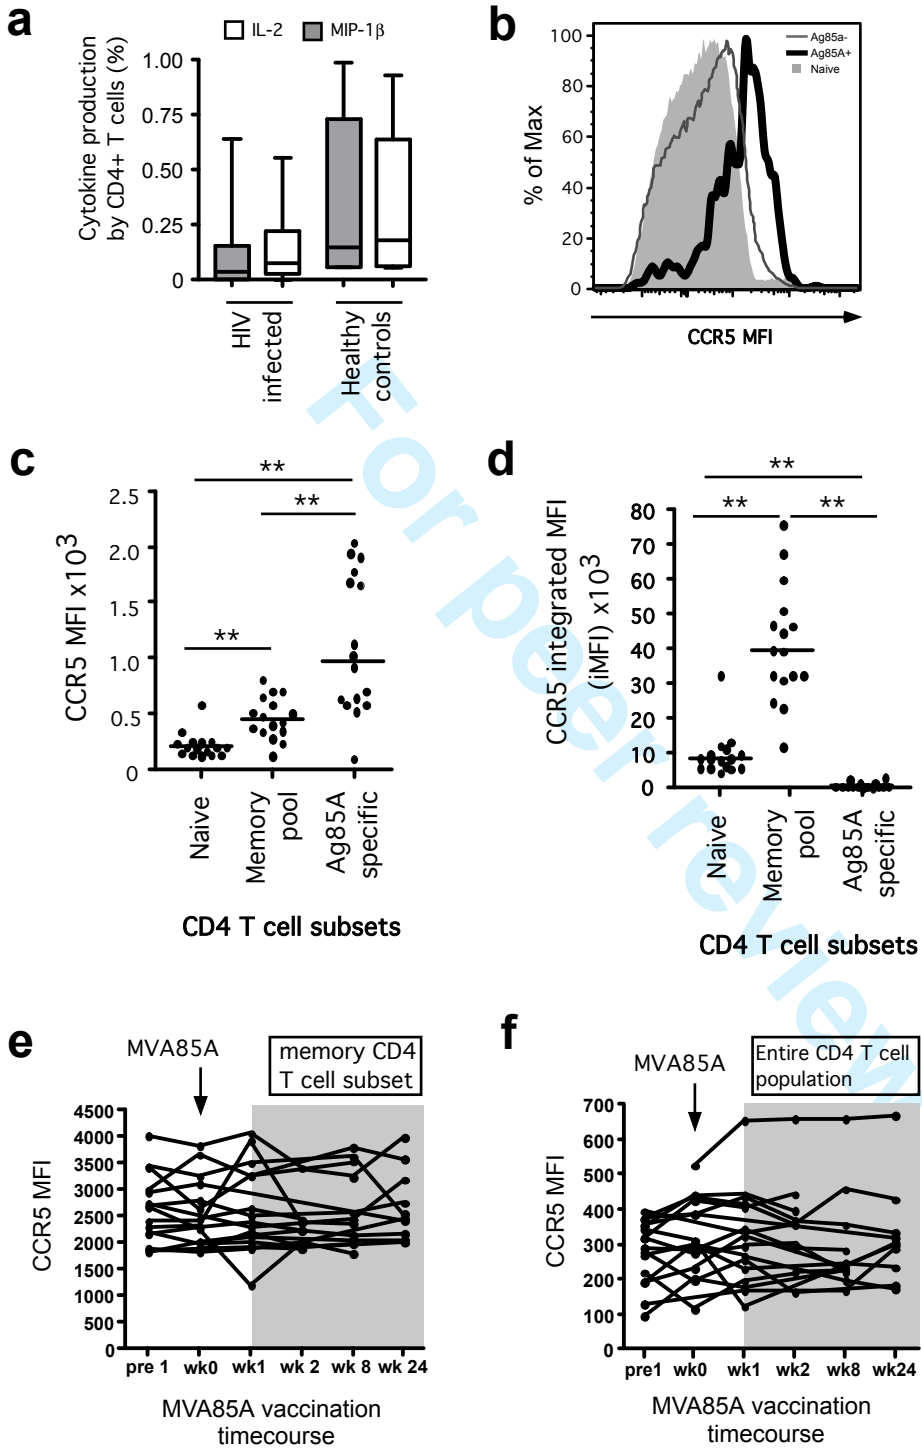

Supplement: bmjopen-2011-000223.draft_revisions.pdf [file bmjopen-2011-000223.draft_revisions.pdf]
